# Supplementary material
Source: Research Square preprint supplement (doi:10.21203/rs.3.rs-7734441/v1)
Supplement: Supplementary file 1 [file 822fa9ad2f28479875310c81.xlsx]

## Sheet: Listening Skills
Code	Zone	Woreda	School Name	Educational Level	Sex	Teaching Experience	The Special Capacity Building Training Program helped me to identify the distinctive nature of listening skills	The Special Capacity Building Training Program helped me to share teaching listening skills experiences with colleagues	The Special Capacity Building Training Program helped me to recognize stages of presenting a listening skills lesson	The Special Capacity Building Training Program helped me to identify the main components of a listening skills lesson	The Special Capacity Building Training Program helped me to conceptualize how listening skills lesson is presented	The Special Capacity Building Training Program helped me to give comment on the strong and weak sides of a listening skills lesson	The Special Capacity Building Training Program helped me to engage in professional learning to improve my teaching of listening skills	The Special Capacity Building Training Program helped me to identify the basic approaches/models to teaching listening skills	The Special Capacity Building Training Program helped me to understand how listening skills should be taught
BU-1	Burji	Soyama	S/S/S/S	Degree	Male	11-15 years	3	4	4	4	3	4	4	4	4
BU-2	Burji	Soyama	Shule	Degree	Male	6 -10 years	5	5	5	4	5	5	4	5	5
BU -3	Burji			MA	Male	16 -20 years	4	4	3	3	4	4	4	4	4
BU -4	Burji			Degree	Male	16-20 years	5	4	5	4	5	4	5	4	5
BU -5	Burji	Soyama	Akeye	Degree	Male	over 20 years	4	4	4	1	4	4	4	4	4
BU-6	Burji	Soyama	Soyama	Degree	Male	11 -15 years	4	4	4	4	4	4	3	4	4
BU -7	Burji	Soyama Town Administration	Soyama Secondary School	Degree	Male	over 20 years	4	4	4	4	4	4	4	4	4
BU -8	Burji	S/Zuria	Chuluse	Degree	Male	11 -15 years	4	5	5	4	4	4	4	4	4
BU -9	Burji	S/Zuria	Shule	Degree	Male	6 -10 years	4	4	4	5	4	5	4	5	5
BU -10	Burji	Soyama	Akia Secondary	Degree	Male	over 20 years	5	5	5	4	4	5	5	5	4
SO -1	South Omo	Hamer	D/M/S/S	Degree	Male	16 -20 years	4	4	5	4	3	5	5	4	5
SO -2	South Omo	Maale	Chaliti Secondary	Degree	Male	6 - 10 years	4	5	4	4	4	4	4	4	4
SO -3	South Omo	Aaari	Jinka High School	Degree	Male	over 20 years	4	5	5	5	5	5	4	5	5
SO -4	South Omo	Maale	Koibe	Degree	Male	11 -15 years	4	5	5	4	4	5	1	4	4
SO -5	South Omo	Dassanech	Omo Tefasess	Degree	Female	6 - 10 years	5	4	5	5	5	4	5	5	5
SO -6	South Omo	Benna Tsemay	Kako	Degree	Male	over 20 years	4	4	4	4	3	3	4	4	4
SO -7	South Omo	Benna Tsemay	Kako	Degree	Male	11 -15 years	4	4	3	4	4	3	4	4	4
SO -8	South Omo	Salamago	Gero	Degree	Male	1 - 5 years	4	5	5	5	4	4	5	5	5
SO - 9	South Omo	Hamer	Dimeka	Degree	Female	1 - 5 years	1	2	3	1	1	1	3	2	1
Gazo -1	Gamo	Birbir Town	M/A/S/S	MA	Male	over 20 years	4	4	4	5	4	4	5	5	5
Gazo -2	Gamo	Boreda	Chilashe	Degree	Male	11 - 15 years	4	4	4	4	4	4	4	4	4
Gazo -3	Gamo	Boreda	Boreda Seconday	MA	Male	11 -15 years	4	4	4	4	3	4	4	4	4
Gazo -4	Gamo	Boreda	Boreda Seconday	Degree	Male	16 -20 years	4	4	4	4	4	4	4	4	4
Gazo -5	Gamo	Birbir Town	M/A/S/S	Degree	Male	over 20 years	4	4	4	4	4	4	4	4	4
Gazo -6	Gamo	Birbir Town	M/A/S/S	Degree	Male	over 20 years	4	4	4	5	4	4	4	4	4
Gazo -7	Gamo	Boreda	Boreda Seconday	MA	Male	16 -20 years	5	5	5	4	5	4	4	5	5
Gazo -8	Gamo	Boreda	Gaga Gocho	Degree	Male	16 -20 years	4	4	5	4	4	4	5	4	4
Gazo -9	Gamo	Boreda	Boreda Seconday	MA	Female	6 -10 years	1	4	4	4	4	4	4	3	2
Gazo -10	Gamo	Mirab Abaya	M/A/S/S	Degree	Female	over 20 years	5	5	5	5	5	5	5	5	5
Gazo -11	Gamo	Birbir Town	M/A/S/S	Degree	Male	16 - 20 years	4	5	4	4	4	4	4	5	4
Gazo -12	Gamo	Boreda	Gaga Gocho	Degree	Male	11 -15 years	1	5	4	2	1	4	4	2	2
Gazo - 13	Gamo	Boreda	Boreda Seconday	Degree	Male	16 - 20 years	5	5	5	5	5	5	5	5	5
Gazo - 14	Gamo	Boreda	Boreda Seconday	Degree	Male	over 20 years	4	4	3	4	4	5	4	4	5
Gazo - 15	Gamo	Boreda	Chilashe Secondary School	Degree	Male	6 - 10 years	5	4	5	4	4	4	4	4	4
Gazo - 16	Gamo	Geressie	Bola Zame	Degree	Female	1 -5 years	5	4	5	5	4	4	5	5	5
Gazo - 17	Gamo	Mirab Abaya	Ankober	MA	Male	16 -20 years	5	5	5	4	5	5	5	4	4
Gazo - 18	Gamo	Geressie	Durbe	Degree	Male	6 - 10 years	4	5	5	5	5	5	5	5	5
Gazo - 19	Gamo	Geressie Zuria	Danbile Otora Secondary	Degree	Male	11 - 15 years	4	4	5	5	4	4	4	4	4
Gazo - 20	Gamo	Mirab Abaya	Umo Lante	Degree	Male	6 - 10 years	5	5	5	5	5	5	5	5	5
Gazo - 21	Gamo	Boreda	Menkura	Degree	Male	16 - 20 years	5	5	5	5	5	5	5	5	5
Gazo - 22	Gamo	Boreda	Zefine Hidasse S.S.	Degree	Male	1 - 5 years	5	4	5	5	5	5	4	4	5
Gazo - 23	Gamo	Gressie Zuria	Danbile Otora Secondary	Degree	Male	6 - 10 years	5	5	5	5	5	5	5	5	5
Gazo - 24	Gamo	Geressie Zuria	Garbansa Ayche Secondary School	Degree	Male	11 -15 years	5	5	5	5	5	5	5	5	5
Gazo - 25	Gamo	Gressie	G/Ayche	Degree	Male	6 - 10 years	5	4	4	5	4	4	5	5	4
Gazo - 26	Gamo	Geressie	Bola Zame	Degree	Male	over 20 years	4	4	4	4	4	4	4	4	4
Gazo - 28	Gamo	Arba Minch	Arba Minch S/S	MA	Male	over 20 years	4	4	4	4	4	5	4	4	4
Gazo - 29	Gamo	Arba Minch	Arba Minch Limat S/S	Degree	Female	11 -15 years	5	5	5	5	4	5	5	5	5
Gazo - 30	Gamo	Daramallo	Wacha Secondary	Degree	Male	over 20 years	5	5	5	5	5	5	5	5	5
Gazo - 31	Gamo	Arba Minch	Arba Minch Prison	Degree	Female	16 - 20 years	5	4	5	5	4	5	5	4	4
Gazo - 32	Gamo	Gacho Baba	Zigiti Merche	Degree	Male	11 - 15 years	5	5	5	4	4	5	4	4	4
Gazo - 33	Gamo	Arba Minch		Degree	Female	16 - 20 years	5	5	5	5	5	5	5	5	5
Gazo - 34	Gamo	Arba Minch		MA	Female	1 - 5 years	5	5	5	5	5	5	5	5	5
Gazo - 35	Gamo	Mirab Abaya	Mirab	Degree	Male	over 20 years	5	5	4	5	4	5	4	5	5
Gazo -36	Gamo	Gacho Baba	Gatse	Degree	Female	1 - 5 years	1	3	3	2	3	3	4	4	4
Gazo - 37	Gamo	Geressie	Geressie High School	Degree	Male	11 - 15 years	5	5	5	5	5	5	5	5	5
Gazo - 38	Gamo	Gacho Baba	Z/Bakole	Degree	Male	16 - 20 years	4	4	4	4	4	4	4	4	4
Gazo - 39	Gamo	Mirab Abaya	Wajifo	Degree	Male	1 - 5 years	4	4	1	1	1	1	1	1	1
Gazo - 40	Gamo	Geressie	Medium School	Degree	Male	11 - 15 years	5	5	5	5	5	5	5	5	4
Gazo - 41	Gamo	Arba Minch Zuria	Sile Sira Primary	Degree	Female	16 - 20 years	1	2	3	3	4	4	4	4	4
Gazo - 42	Gamo	Gacho Baba	Zigiti Bakole	MA	Male	16 - 20 years	5	5	5	5	5	5	5	5	5
Gazo - 43	Gamo	Geressie	Geressie S.S.	Degree	Female	16 - 20 years	5	5	5	5	4	4	5	4	4
Gazo - 44	Gamo	Kamba	Kamba	Degree	Male	16 - 20 years	4	5	4	4	5	4	4	5	5
Gazo - 46	Gamo	Arba Minch Zuria	Kola Shele	Degree	Male	11 - 15 years	4	3	3	4	3	4	2	4	3
Gazo - 47	Gamo	Arba Minch Zuria	Lante Primary	Degree	Female	6 - 10 years	4	5	5	4	4	4	4	4	4
Gazo - 48	Gamo	Mirab Abaya	Umo Lante	Degree	Female	6 - 10 years	5	4	4	4	3	2	4	5	4
Gazo - 49	Gamo	Boreda	Chillashe Allo	Degree	Female	11 - 15 years	5	4	2	3	3	2	4	5	4
Gazo - 50	Gamo	Mirab Abaya	Mirab Abaya	Degree	Male	11 - 15 years	5	5	5	5	5	5	5	5	5
Gazo - 51	Gamo	Dita	Zada	Degree	Female	16 - 20 years	4	5	5	5	5	5	5	5	5
Gazo - 52	Gamo	Kamba	Kamba Secondary	Degree	Male	over 20 years	5	5	5	5	5	5	5	5	5
Gazo - 53	Gamo	Chencha	Chencha S/S	MA	Male	16 - 20 years	4	3	5	5	5	4	4	5	4
Gazo - 54	Gamo	Gressie	Geressie High School	Degree	Male	16 - 20 years	1	1	2	1	2	1	1	1	1
Gazo - 55	Gamo	Chencha	Chencha S/S	Degree	Male	1 - 5 years	2	2	3	3	3	3	4	4	3
Gazo - 56	Gamo	Gacho Baba	Wusamo	Degree	Male	1 - 5 years	5	5	5	5	5	5	5	5	5
Gazo - 57	Gamo	Kamba	Kamba Secondary	Degree	Female	16 - 20 years	4	5	5	5	5	5	5	5	5
Gazo - 58	Gamo	Kamba	Kamba Secondary	MA	Male	16 - 20 years	5	5	5	5	5	5	5	5	5
Gazo - 59	Gamo	Kamba	Kamba Secondary	Degree	Male	16 - 20 years	5	5	5	5	5	5	4	4	5
Gazo - 60	Gamo	Kamba	Kamba Secondary	Degree	Male	6 - 10 years	3	4	4	4	4	4	4	4	3
Gazo - 61	Gamo	Dita	Zada Secondary	Degree	Female	6 - 10 years	4	5	5	4	5	4	4	4	5
Gazo - 62	Gamo	Dita	Zada Secondary	Degree	Male	6 - 10 years	3	1	1	2	1	1	1	2	4
Gazo - 63	Gamo	Arba Minch Zuria	Zeyse Elgo Secondary	Degree	Male	over 20 years	5	4	5	5	5	4	5	5	5
Gazo - 64	Gamo	Arba Minch Zuria	Kola Shele	Degree	Male	16 - 20 years	4	4	5	4	5	5	4	5	4
Gazo - 65	Gamo	Arba Minch Zuria	Lante	MA	Male	over 20 years	5	4	5	5	4	5	5	5	5
Gazo - 66	Gamo	Arba Minch Zuria	Shelle Mella Secondary	Degree	Male	over 20 years	4	4	5	5	5	5	5	5	5
Gazo - 67	Gamo	Arba Minch Zuria	Kama Zeyse	Degree	Male	over 20 years	5	5	5	5	5	5	5	5	5
Gazo - 68	Gamo	Dita	Zada Secondary	Degree	Male	16 - 20 years	5	5	5	5	5	5	5	5	5
Gazo - 69	Gamo	Arba Minch Zuria	Chamo	Degree	Male	16 - 20 years	4	3	4	2	4	4	4	3	4
Gazo - 70	Gamo	Dita	Zada	Degree	Female	6 - 10 years	3	2	2	1	2	3	3	3	5
Gazo - 71	Gamo	Dita	Zada Secondary	Degree	Female	16 - 20 years	3	4	4	4	4	4	4	4	3
Gazo - 72	Gamo	Dita	Woyza	Degree	Female	6 -10 years	4	5	5	3	3	4	4	4	4
Gazo - 73	Gamo	Arba Minch Town	Gamo Bayra	MA	Female	over 20 years	4	4	4	4	4	5	2	4	4
Gazo - 74	Gamo	Dita	Zada Secondary	Degree	Male	6 - 10 years	4	5	5	5	5	3	4	4	4
Gazo - 75	Gamo	Dita	Dita Suluse	Degree	Male	6 - 10 years	4	5	5	5	3	5	5	4	5
Gazo - 77	Gamo	Chencha	Dorze	MA	Male	over 20 years	4	5	4	5	5	5	5	5	5
Gazo - 78	Gamo	Arba Minch Town	Arba Minch Comp.	MA	Male	over 20 years	5	5	5	5	5	5	5	5	5
Gazo - 79	Gamo	Arba Minch Town	Arba Minch Highschool	MA	Female	over 20 years	5	5	5	5	5	5	5	5	5
Gazo - 80	Gamo	Chencha	Dorze	Degree	Male	16 - 20 years	4	4	4	4	4	4	4	4	4
Gazo - 81	Gamo	Kamba	Kamba Secondary	Degree	Male	16 - 20 years	3	1	4	5	4	4	4	3	5
Gazo - 82	Gamo	Geressie Zuria	Danbile Ossa	Degree	Male	11 - 15 years	5	5	5	5	5	4	5	5	5
Gazo - 83	Gamo	Boreda	Gaga Gocho	Degree	Male	16 - 20 years	4	5	4	5	4	5	5	4	5
Gazo - 84	Gamo	Mirab Abaya	Mirab Abaya	Degree	Male	16 - 20 years	5	5	5	5	5	5	5	5	5
Gazo - 85	Gamo	Boreda	Kite	Degree	Male	11 - 15 years	5	5	5	5	5	5	5	5	5
Gazo - 86	Gamo	Gressie	Bola Zame	Degree	Female	11 -15 years	4	5	4	4	4	4	4	4	4
Gazo - 87	Gamo	Boreda	Gaga Gocho	Degree	Female	6 - 10 years	4	4	4	4	4	4	4	4	4
Gazo - 88	Gamo	Boreda	Boreda Seconday	Degree	Female	6 - 10 years	4	4	4	4	4	4	4	4	4
Gazo - 89	Gamo	Mirab Abaya	Umo Lante	Degree	Male	16 - 20 years	1	4	5	4	4	4	2	4	4
Gazo - 90	Gamo	Mirab Abaya	Umo Lante	Degree	Male	11 - 15 years	4	4	5	5	4	4	4	5	5
Gazo - 91	Gamo	Boreda	Boreda Seconday	MA	Male	over 20 years	5	5	5	5	5	5	5	5	5
Gazo - 92	Gamo	Boreda	Menusha Secondary	MA	Male	6 - 10 years	4	4	5	5	5	5	3	4	4
Gazo - 93	Gamo	Boreda	Boreda Seconday	Degree	Male	16 - 20 years	5	5	5	5	5	5	5	5	5
Gazo - 94	Gamo	Boreda	Boreda Seconday	MA	Male	11 - 15 years	4	4	3	2	2	4	4	2	4
Gazo - 95	Gamo	Birbir Town	Mirab Abaya S/S	MA	Male	11 - 15 years	4	5	5	5	5	5	4	4	4
Gazo - 96	Gamo	Birbir Town	Mirab Abaya S/S	MA	Male	16 - 20 years	4	5	5	4	5	4	5	5	4
Gazo - 97	Gamo	Boreda	Boreda Seconday	Degree	Male	over 20 years	5	5	5	5	4	5	5	4	5
Gazo - 98	Gamo	Bonke	Gazeso	Degree	Female	16 - 20 years	5	5	5	5	5	4	5	4	4
Gazo - 99	Gamo	Garda Marta	Qogale	Degree	Female	1 - 5 years	5	5	5	5	5	5	4	5	5
Gazo - 100	Gamo	Chencha	Shama	Degree	Male	11 - 15 years	5	5	4	5	4	4	5	4	4
Gazo - 101	Gamo	Kogota	Ezzo Secondary	Degree	Female	6 - 10 years	5	4	3	5	5	3	4	3	4
Gazo - 102	Gamo	Bonke	Kashaso	Degree	Male	11 - 15 years	4	4	5	4	4	4	5	5	4
Gazo - 103	Gamo	Bonke	Gazeso	Degree	Male	11 - 15 years	4	5	5	5	5	5	4	5	4
Gazo - 104	Gamo	Selamber Town	Selamber	MA	Male	16 - 20 years	5	5	5	5	4	4	5	4	5
Gazo - 105	Gamo	Qucha	S/S/School	Degree	Male	16 - 20 years	4	3	3	4	3	4	3	3	3
Gazo - 106	Gamo	Selamber Town	S/S/School	Degree	Male	11 - 15 years	3	4	4	3	3	3	3	3	3
Gazo - 107	Gamo	Kucha	Dinke Highschool	Degree	Female	11 - 15 years	4	3	4	3	3	3	3	3	3
Gazo - 108	Gamo	Arba Minch Town	Arba Minch	MA	Male	11 - 15 years	4	5	5	5	4	4	4	4	5
Gazo - 109	Gamo	Boreda	Boreda Seconday	Degree	Male	16 - 20 years	4	4	3	5	4	5	3	5	4
Gazo - 110	Gamo	Arba Minch	Arba Minch S/S	Degree	Male	over 20 years	1	5	5	5	5	5	5	4	5
Gazo - 111	Gamo	Arba Minch	Arba Minch	Degree	Male	over 20 years	4	4	4	5	4	4	4	4	5
Gazo - 114	Gamo	Arba Minch Town	Arba Minch S/S	Degree	Female	16 - 20 years	5	5	5	5	5	5	5	5	5
Gazo - 115	Gamo	Arba Minch Town	Chamo Secondary	MA	Female	over 20 years	5	5	5	5	5	5	5	5	5
Gazo - 116	Gamo	Bonke	Gazeso Secondary	Degree	Male	6 - 10 years	5	5	5	5	5	5	5	5	5
Gazo - 119	Gamo	Arba Minch	Abaya	Degree	Male	over 20 years	4	5	4	4	5	5	5	5	5
Gazo - 120	Gamo	Kogota	Ezzo Secondary	MA	Male	over 20 years	5	5	5	5	5	5	5	5	5
Gazo - 122	Gamo	Kogota	Ezzo Secondary	Degree	Male	16 - 20 years	4	5	5	5	4	4	4	4	4
Gazo - 123	Gamo	Kogota	Kogota	Degree	Male	6 - 10 years	4	4	5	5	4	5	4	3	5
Gazo - 124	Gamo	Arba Minch	Abaya	Degree	Female	16 - 20 years	4	4	5	5	5	4	5	4	5
Gazo - 125	Gamo	Arba Minch	Abaya Secondary	Degree	Male	over 20 years	4	5	5	5	5	5	5	5	4
Gazo - 126	Gamo	Birbir Town	Mirab Abaya S/S	MA	Female	over 20 years	1	3	3	4	3	4	3	4	3
Gazo - 127	Gamo	Birbir Town	Birbir S/S	MA	Female	over 20 years	5	5	5	3	5	5	4	5	3
Gazo - 128	Gamo	Kogota	Ezzo Secondary	Degree	Male	11 - 15 years	5	4	4	4	4	4	5	4	4
Gazo - 129	Gamo	Bonke	Baza	Degree	Male	1 - 5 years	5	5	5	4	5	5	5	5	4
Gazo - 130	Gamo	Arba Minch Zuria	Chano Dorga	Degree	Male	16 - 20 years	3	2	2	2	4	3	2	2	3
Gazo - 131	Gamo	Arba Minch	Abaya	Degree	Male	over 20 years	4	5	5	5	5	5	5	5	5
Gazo - 132	Gamo	Arba Minch Town	Chamo Secondary	MA	Male	over 20 years	5	5	5	5	5	4	5	5	5
Gazo - 133	Gamo	Arba Minch Town	Chamo Secondary	Degree	Male	16 -20 years	4	4	5	5	5	4	4	5	5
Gazo - 134	Gamo	Arba Minch Town	Arba Minch S/S	Degree	Male	over 20 years	4	4	4	4	4	4	4	4	4
Gazo - 135	Gamo	Mirab Abaya	Mirab Abaya S/S	MA	Male	over 20 years	4	4	4	4	4	4	5	5	5
Gazo - 136	Gamo	Daramallo	Wacha Secondary	MA	Male	over 20 years	4	5	4	5	4	5	5	3	5
KO - 1	Konso	Karat Town	Konso Highschool	Degree	Female	over 20 years	4	5	4	5	4	4	5	5	4
KO - 2	Konso	Karat Town	Konso Highschool	Degree	Female	11 - 15 years	4	4	3	4	4	3	4	3	5
KO - 3	Konso	Kena	Fasha Secondary	Degree	Male	11 - 15 years	4	4	4	5	5	5	4	4	5
KO - 4	Konso	Kolme Town	Kolme	Degree	Male	6 - 10 years	4	4	4	5	4	5	4	4	4
KO - 5	Konso	Karat Town	Konso Secondary	Degree	Male	11 - 15 years	4	5	4	4	4	5	5	4	5
KO - 6	Konso	Karat Town	Konso Secondary	Degree	Male	1 - 5 years	5	5	5	5	5	4	4	4	5
KO - 7	Konso	Karat Town	K/S/P/S	MA	Female	11 - 15 years	3	5	4	5	5	4	4	3	5
KO - 8	Konso	Kena	Fasha Secondary	Degree	Male	16 - 20 years	4	4	4	4	5	4	4	4	4
KO - 9	Konso	Karat Town	Konso Highschool	Degree	Male	over 20 years	4	5	5	5	5	4	4	5	5
KO - 10	Konso	Kena	Fasha Highschool	Degree	Male	11 - 15 years	5	5	5	4	5	5	5	5	5
KO - 11	Konso	Karat Zuria	Arsayide	Degree	Male	1 - 5 years	3	3	3	3	3	3	3	3	3
KO - 12	Konso	Karat Town	K/S/P/S	MA	Male	over 20 years	5	5	5	5	5	5	5	5	5
KO -13	Konso	Kena	Doha Secondary	Degree	Male	11 - 15 years	4	5	5	5	5	5	5	5	5
KO - 14	Konso	Kena	Doha Secondary	Degree	Male	over 20 years	5	5	5	5	5	5	5	5	5
KO - 15	Konso	Kena	Fasha Secondary	Degree	Male	over 20 years	4	5	5	5	4	4	4	4	4
KO - 16	Konso	Segen Zuria	Hailato Dokatu	Degree	Male	over 20 years	4	5	5	5	5	4	5	5	4
KO - 18	Konso	Kena	Fasha Secondary	Degree	Male	11 - 15 years	5	4	4	4	4	5	4	5	5
Kore - 1	Koore		Dohonso	Degree	Female	over 20 years	4	5	4	5	4	4	5	4	4
Kore - 2	Koore	Kelle Town	Kelle Secondary	Degree	Female	11 - 15 years	4	5	4	4	4	4	4	4	4
Kore - 3	Koore	Gorka	M/K/Dano	Degree	Male	6 - 10 years	5	4	4	5	4	4	4	5	4
Kore - 4	Koore	Kelle Town	Kelle Secondary	Degree	Male	over 20 years	1	3	1	1	1	4	1	1	1
Kore - 5	Koore	Gorka	Jijola M/S/S	Degree	Male	over 20 years	4	5	5	5	4	4	4	5	5
Kore - 6	Koore	Kelle Town	Kelle Secondary	MA	Male	16 - 20 years	5	5	5	5	5	4	3	5	5
Kore - 7	Koore	Gorka	Jijola M/S/S	Degree	Male	over 20 years	4	5	4	4	4	4	5	4	5
Kore - 8	Koore	Kelle Town	Kelle Secondary	Degree	Male	over 20 years	4	4	5	5	4	5	4	3	4
Kore - 9	Koore	Amaro	Dhonso	MA	Male	11 - 15 years	2	2	2	2	2	3	2	4	2
Kore - 10	Koore	Amaro	Dhonso	MA	Male	over 20 years	2	2	2	2	2	2	2	2	2
Kore - 11	Koore	Kelle Town	Dhonso	Degree	Male	over 20 years	4	5	4	4	4	4	5	5	4
Kore - 12	Koore	Kelle Town	Kelle Secondary	MA	Male	16 -20 years	2	4	4	4	4	4	3	4	4
Kore - 13	Koore	Gorka	Etate	Degree	Male	over 20 years	5	5	5	5	5	5	4	5	4
Kore - 14	Koore	Kelle Town	Dhonso	MA	Male	16 - 20 years	3	2	3	3	3	3	2	3	3
Kore - 15	Koore	Gorka	Jijola	Degree	Male	over 20 years	4	4	4	4	4	4	4	4	4
Kore - 16	Koore	Gorka	Dano	Degree	Male	11 - 15 years	4	4	3	4	4	4	4	3	3
Kore - 17	Koore	Gorka	Jijola	Degree	Female	6 - 10 years	3	4	4	4	3	4	3	5	4
Kore - 18	Koore	Kelle Town	Kelle Secondary	Degree	Male	6 - 10 years	5	5	5	5	5	5	5	5	5
Kore - 19	Koore	Gorka	Jijola	Degree	Male	6 - 10 years	5	5	4	4	5	5	5	5	5
Kore - 20	Koore	Kelle	Dhonso	MA	Male	6 - 10 years	4	4	5	5	4	4	4	5	4
Kore - 21	Koore	Gorka	Mesay Kasa Dano S/S	Degree	Male	6 - 12 years	4	4	4	5	4	4	5	5	5
Aari - 1	Aari	South Aari	Berka	Degree	Male	1 - 5 years	3	2	4	5	4	3	4	3	3
Aari - 2	Aari			Degree	Male	over 20 years	1	4	3	1	2	3	4	4	1
Aari - 3	Aari	Jinka	Meles Zenawi Memorial S/S	MA	Male	16 - 20 years	5	5	5	5	5	5	5	5	5
Aari - 4	Aari	Jinka Town Administration	Jinka Secondary School	Degree	Female	16 - 20 years	4	5	5	4	4	4	4	4	4
Aari - 6	Aari	Jinka Town Administration	Meles Zenawi Memorial S/S	MA	Male	over 20 years	5	5	5	5	5	4	5	5	5
Aari - 7	Aari	Semen Aari	Melorasha Secondary	Degree	Male	11 - 15 years	5	5	5	5	5	4	5	5	5
Aari - 8	Aari	Semen Aari	Gelila	Degree	Male	6 - 10 years	4	5	5	5	5	5	5	5	5
Aari - 9	Aari	Semen Aari	Gelila	MA	Male	6 - 10 years	5	5	5	5	5	5	5	5	5
Aari - 10	Aari	Jinka	Jinka High School	MA	Female	over 20 years	4	4	4	5	4	5	4	5	4
Aari - 11	Aari	Jinka	Meles Zenawi Memorial S/S	MA	Male	over 20 years	5	4	5	5	5	4	5	5	5
Aari - 12	Aari	South Aari	Goh	Degree	Male	16 - 20 years	4	5	5	4	4	4	4	4	4
Aari - 13	Aari	Jinka	Jinka M/S/S	MA	Male	11 - 15 years	5	5	5	4	4	4	3	4	5
Aari - 14	Aari	Jinka	Jinka	Degree	Male	over 20 years	4	3	4	3	3	3	3	4	3
Aari - 16	Aari	South Aari	Gorker	MA	Male	over 20 years	5	5	5	5	5	4	4	5	4
Aari - 17	Aari	Jinka		Degree	Male	11 - 15 years	4	5	4	5	4	4	4	4	4
Aari - 18	Aari	South Aari	Gorker	Degree	Female	11 - 15 years	5	5	5	5	5	5	5	5	5
Aari - 19	Aari	Jinka	Jinka M/S/S	Degree	Female	11 - 15 years	5	5	5	5	5	5	5	5	5
Aari - 20	Aari	Jinka	Jinka Secondary School	Degree	Male	over 20 years	5	4	5	4	5	4	5	5	4
Aari - 21	Aari	Jinka	Jinka Secondary School	Degree	Male	over 20 years	3	4	4	4	4	4	3	3	3
Aari - 22	Aari	South Aari	Goh	Degree	Male	2024-11-15	4	4	4	4	4	4	4	4	4
Aari - 24	Aari	Jinka	Jinka High School	Degree	Female	over 20 years	5	5	5	4	5	4	5	5	5
Aari -26	Aari	Baka-Dawla	Yetnebersh	Degree	Male	16 - 20 years	3	2	3	2	3	4	4	3	4
Aari - 27	Aari	Jinka	Jinka M/S/S	MA	Female	over 20 years	4	4	4	4	4	5	2	4	4
Gard - 1	Gardula	Derashe	Bussa Killa Secondary School	Degree	Female	1 - 5 years	4	4	4	4	4	4	4	4	4
Gard - 2	Gardula	Derashe	Gidole Secondary	MA	Male	16 - 20 Years	5	4	5	5	5	4	4	5	5
Gard - 3	Gardula	Derashe	Holte	Degree	Male	16 - 20 years	5	5	5	5	5	5	5	5	5
Gard - 4	Gardula	Derashe	Arguba	Degree	Male	1 - 5 years	4	3	5	5	4	3	4	5	5
Gard - 5	Gardula	Derashe	G/S/S/S	Degree	Female	over 20 years	5	5	5	5	5	5	5	5	5
Gard - 6	Gardula	Derashe	G/S/S/S	Degree	Female	over 20 years	5	4	5	5	5	5	5	5	5
Gard - 7	Gardula	Derashe	Gidole Secondary	MA	Male	over 20 years	5	4	5	5	5	5	5	5	5
Gard - 8	Gardula	Derashe	Gidole Prison Highschool	Degree	Male	over 20 years	4	4	5	5	5	5	4	5	5
Gard - 9	Gardula	Derashe	G/S/S/S	Degree	Male	over 20 years	4	3	5	5	4	4	4	4	5
Gard - 10	Gardula	Derashe	Gidole Prison Highschool	Degree	Male	1 - 15 years	5	4	5	4	4	5	5	5	4
Gard - 11	Gardula	Derashe	Gato	Degree	Male	1 - 5 years	3	3	3	3	3	3	3	3	3
Gard - 12	Gardula	Derashe	Shilale	Degree	Male	1 - 5 years	4	4	5	4	4	4	4	4	4
Gard - 13	Gardula	Derashe	Holte	Degree	Male	16 - 20 years	4	4	4	4	4	4	4	4	4
Gard - 14	Gardula	Derashe	Haybena	Degree	Male	over 20 years	4	5	5	4	5	5	5	4	4

## Sheet: Speaking Skills
Code	Zone	Woreda	School Name	Educational Level	Sex	Teaching Experience	The Special Capacity Building Training Program helped me to practice different speaking activities designed to improve my speaking experiences	The Special Capacity Building Training Program helped me to practice speaking skills lesson	The Special Capacity Building Training Program helped me to analyze components of a speaking lesson at different levels	The Special Capacity Building Training Program helped me to share my challenges related to teaching speaking skills	The Special Capacity Building Training Program helped me to identify the key components of a speaking lesson	The Special Capacity Building Training Program helped me to give comments to my partners’ peer teaching	The Special Capacity Building Training Program helped me to identify basic strategies of teaching speaking skills	The Special Capacity Building Training Program helped me to experience instructional strategies in teaching speaking skills	The Special Capacity Building Training Program helped me to improve my classroom teaching and learning practices	The Special Capacity Building Training Program helped me to conduct model peer teaching practices in speaking skills
BU-1	Burji	Soyama	S/S/S/S	Degree	Male	11-15 years	4	4	4	4	4	5	5	5	4	4
BU-2	Burji	Soyama	Shule	Degree	Male	6 -10 years	5	4	5	4	5	5	5	4	4	4
BU -3	Burji			MA	Male	16 -20 years	5	4	4	4	3	5	4	5	4	4
BU -4	Burji			Degree	Male	16-20 years	4	5	3	5	5	5	4	4	4	5
BU -5	Burji	Soyama	Akeye	Degree	Male	over 20 years	4	4	4	4	4	4	4	4	4	3
BU-6	Burji	Soyama	Soyama	Degree	Male	11 -15 years	4	4	4	4	4	4	4	3	4	4
BU -7	Burji	Soyama Town Administration	Soyama Secondary School	Degree	Male	over 20 years	4	4	4	4	3	4	4	4	3	4
BU -8	Burji	S/Zuria	Chuluse	Degree	Male	11 -15 years	4	4	3	4	5	4	4	4	4	4
BU -9	Burji	S/Zuria	Shule	Degree	Male	6 -10 years	4	4	5	5	5	4	5	5	5	5
BU -10	Burji	Soyama	Akia Secondary	Degree	Male	over 20 years	4	5	4	5	5	5	4	5	5	4
SO -1	South Omo	Hamer	D/M/S/S	Degree	Male	16 -20 years	4	5	4	3	5	4	5	4	5	4
SO -2	South Omo	Maale	Chaliti Secondary	Degree	Male	6 - 10 years	4	5	4	4	5	5	4	4	5	4
SO -3	South Omo	Aaari	Jinka High School	Degree	Male	over 20 years	5	5	5	5	5	4	5	4	4	5
SO -4	South Omo	Maale	Koibe	Degree	Male	11 -15 years	4	4	5	4	5	4	5	5	4	5
SO -5	South Omo	Dassanech	Omo Tefasess	Degree	Female	6 - 10 years	4	5	4	5	5	5	4	5	4	5
SO -6	South Omo	Benna Tsemay	Kako	Degree	Male	over 20 years	4	4	4	3	5	4	4	4	4	4
SO -7	South Omo	Benna Tsemay	Kako	Degree	Male	11 -15 years	4	4	4	3	5	4	4	4	4	4
SO -8	South Omo	Salamago	Gero	Degree	Male	1 - 5 years	5	5	4	4	5	5	4	5	5	4
SO - 9	South Omo	Hamer	Dimeka	Degree	Female	1 - 5 years	1	2	4	3	4	4	4	3	3	4
Gazo -1	Gamo	Birbir Town	M/A/S/S	MA	Male	over 20 years	5	5	5	4	5	5	5	4	5	5
Gazo -2	Gamo	Boreda	Chilashe	Degree	Male	11 - 15 years	4	4	4	5	5	5	5	4	5	5
Gazo -3	Gamo	Boreda	Boreda Seconday	MA	Male	11 -15 years	5	5	3	4	5	4	4	4	4	4
Gazo -4	Gamo	Boreda	Boreda Seconday	Degree	Male	16 -20 years	4	4	5	4	5	5	4	4	5	5
Gazo -5	Gamo	Birbir Town	M/A/S/S	Degree	Male	over 20 years	4	4	4	4	4	4	4	4	5	5
Gazo -5	Gamo	Birbir Town	M/A/S/S	Degree	Male	over 20 years	4	4	4	4	4	4	4	4	4	4
Gazo -7	Gamo	Boreda	Boreda Seconday	MA	Male	16 -20 years	5	5	5	5	5	5	5	5	5	5
Gazo -8	Gamo	Boreda	Gaga Gocho	Degree	Male	16 -20 years	4	4	4	4	4	4	5	5	5	5
Gazo -9	Gamo	Boreda	Boreda Seconday	MA	Female	6 -10 years	2	4	3	2	1	4	4	3	4	4
Gazo -10	Gamo	Mirab Abaya	M/A/S/S	Degree	Female	over 20 years	4	5	5	4	5	5	5	5	4	4
Gazo -11	Gamo	Birbir Town	M/A/S/S	Degree	Male	16 - 20 years	4	4	4	5	5	4	4	4	4	5
Gazo -12	Gamo	Boreda	Gaga Gocho	Degree	Male	11 -15 years	5	4	4	3	4	4	4	4	1	1
Gazo - 13	Gamo	Boreda	Boreda Seconday	Degree	Male	16 - 20 years	5	5	5	5	5	5	5	5	5	5
Gazo - 14	Gamo	Boreda	Boreda Seconday	Degree	Male	over 20 years	5	4	4	5	4	4	4	4	4	3
Gazo - 15	Gamo	Boreda	Chilashe Secondary School	Degree	Male	6 - 10 years	5	5	5	5	5	5	5	5	5	5
Gazo - 16	Gamo	Geressie	Bola Zame	Degree	Female	1 -5 years	4	5	4	5	4	5	5	4	5	5
Gazo - 17	Gamo	Mirab Abaya	Ankober	MA	Male	16 -20 years	4	4	5	5	5	5	5	4	5	4
Gazo - 18	Gamo	Geressie	Durbe	Degree	Male	6 - 10 years	5	5	4	5	5	5	5	5	5	5
Gazo - 19	Gamo	Geressie Zuria	Danbile Otora Secondary	Degree	Male	11 - 15 years	4	4	5	4	5	4	4	4	4	5
Gazo - 20	Gamo	Mirab Abaya	Umo Lante	Degree	Male	6 - 10 years	5	5	5	5	5	5	5	5	5	5
Gazo - 21	Gamo	Boreda	Menkura	Degree	Male	16 - 20 years	5	4	4	4	5	5	5	4	5	5
Gazo - 22	Gamo	Boreda	Zefine Hidasse S.S.	Degree	Male	1 - 5 years	5	5	5	4	5	5	5	4	5	5
Gazo - 23	Gamo	Gressie Zuria	Danbile Otora Secondary	Degree	Male	6 - 10 years	5	5	4	5	5	4	5	5	4	4
Gazo - 24	Gamo	Geressie Zuria	Garbansa Ayche Secondary School	Degree	Male	11 -15 years	5	5	5	5	5	5	5	5	5	5
Gazo - 25	Gamo	Gressie	G/Ayche	Degree	Male	6 - 10 years	5	5	4	4	5	5	5	5	4	4
Gazo - 26	Gamo	Geressie	Bola Zame	Degree	Male	over 20 years	4	4	4	4	4	4	4	4	4	4
Gazo - 28	Gamo	Arba Minch	Arba Minch S/S	MA	Male	over 20 years	4	4	4	4	4	5	5	5	4	5
Gazo - 29	Gamo	Arba Minch	Arba Minch Limat S/S	Degree	Female	11 -15 years	5	5	4	5	5	5	5	5	5	5
Gazo - 30	Gamo	Daramallo	Wacha Secondary	Degree	Male	over 20 years	5	5	5	5	5	5	5	5	4	5
Gazo - 31	Gamo	Arba Minch	Arba Minch Prison	Degree	Female	16 - 20 years	4	4	4	4	5	4	4	4	4	3
Gazo - 32	Gamo	Gacho Baba	Zigiti Merche	Degree	Male	11 - 15 years	5	5	4	5	5	5	4	4	4	5
Gazo - 33	Gamo	Arba Minch		Degree	Female	16 - 20 years	5	5	5	5	5	4	5	5	4	4
Gazo - 34	Gamo	Arba Minch		MA	Female	1 - 5 years	5	5	5	5	5	5	5	5	4	5
Gazo - 35	Gamo	Mirab Abaya	Mirab	Degree	Male	over 20 years	4	4	4	5	4	5	4	5	5	5
Gazo -36	Gamo	Gacho Baba	Gatse	Degree	Female	1 - 5 years	3	3	4	4	3	4	3	3	4	4
Gazo - 37	Gamo	Geressie	Geressie High School	Degree	Male	11 - 15 years	5	5	4	5	5	5	4	4	5	4
Gazo - 38	Gamo	Gacho Baba	Z/Bakole	Degree	Male	16 - 20 years	4	4	4	4	4	4	4	4	4	4
Gazo - 39	Gamo	Mirab Abaya	Wajifo	Degree	Male	1 - 5 years	2	4	4	4	4	4	4	4	4	4
Gazo - 40	Gamo	Geressie	Medium School	Degree	Male	11 - 15 years	2	4	5	5	4	5	5	4	4	4
Gazo - 41	Gamo	Arba Minch Zuria	Sile Sira Primary	Degree	Female	16 - 20 years	4	3	4	4	4	4	4	3	3	3
Gazo - 42	Gamo	Gacho Baba	Zigiti Bakole	MA	Male	16 - 20 years	4	5	4	1	4	5	4	4	4	5
Gazo - 43	Gamo	Geressie	Geressie S.S.	Degree	Female	16 - 20 years	5	5	4	4	4	5	5	5	5	5
Gazo - 44	Gamo	Kamba	Kamba	Degree	Male	16 - 20 years	5	5	4	5	5	5	4	4	5	4
Gazo - 46	Gamo	Arba Minch Zuria	Kola Shele	Degree	Male	11 - 15 years	4	4	2	2	3	4	4	2	3	3
Gazo - 47	Gamo	Arba Minch Zuria	Lante Primary	Degree	Female	6 - 10 years	4	4	4	4	4	4	4	4	5	4
Gazo - 49	Gamo	Boreda	Chillashe Allo	Degree	Female	11 - 15 years	4	5	4	5	4	5	4	4	5	2
Gazo - 50	Gamo	Mirab Abaya	Mirab Abaya	Degree	Male	11 - 15 years	5	5	5	4	5	5	5	5	5	5
Gazo - 51	Gamo	Dita	Zada	Degree	Female	16 - 20 years	4	5	4	4	5	5	5	3	4	4
Gazo - 52	Gamo	Kamba	Kamba Secondary	Degree	Male	over 20 years	5	5	5	5	5	5	5	5	5	5
Gazo - 53	Gamo	Chencha	Chencha S/S	MA	Male	16 - 20 years	1	4	4	3	5	4	5	2	3	4
Gazo - 54	Gamo	Gressie	Geressie High School	Degree	Male	16 - 20 years	1	1	1	2	2	2	1	2	1	2
Gazo - 55	Gamo	Chencha	Chencha S/S	Degree	Male	1 - 5 years	3	3	3	3	2	2	3	3	3	3
Gazo - 56	Gamo	Gacho Baba	Wusamo	Degree	Male	1 - 5 years	5	5	5	5	5	5	5	5	5	5
Gazo - 57	Gamo	Kamba	Kamba Secondary	Degree	Female	16 - 20 years	5	5	5	5	5	5	5	5	5	5
Gazo - 58	Gamo	Kamba	Kamba Secondary	MA	Male	16 - 20 years	5	5	5	5	5	5	5	5	5	5
Gazo - 59	Gamo	Kamba	Kamba Secondary	Degree	Male	16 - 20 years	5	5	5	5	4	5	4	5	5	5
Gazo - 60	Gamo	Kamba	Kamba Secondary	Degree	Male	6 - 10 years	4	4	4	3	4	4	4	3	4	4
Gazo - 61	Gamo	Dita	Zada Secondary	Degree	Female	6 - 10 years	5	5	5	5	5	5	5	5	5	5
Gazo - 62	Gamo	Dita	Zada Secondary	Degree	Male	6 - 10 years	1	4	3	3	2	4	1	1	1	4
Gazo - 63	Gamo	Arba Minch Zuria	Zeyse Elgo Secondary	Degree	Male	over 20 years	5	4	5	5	5	5	5	5	5	5
Gazo - 64	Gamo	Arba Minch Zuria	Kola Shele	Degree	Male	16 - 20 years	4	5	4	4	5	5	4	4	4	5
Gazo - 65	Gamo	Arba Minch Zuria	Lante	MA	Male	over 20 years	5	5	5	5	5	5	5	5	4	4
Gazo - 66	Gamo	Arba Minch Zuria	Shelle Mella Secondary	Degree	Male	over 20 years	5	5	5	5	5	5	5	5	5	5
Gazo - 67	Gamo	Arba Minch Zuria	Kama Zeyse	Degree	Male	over 20 years	5	5	5	5	5	5	5	5	5	5
Gazo - 68	Gamo	Dita	Zada Secondary	Degree	Male	16 - 20 years	4	3	4	5	5	5	4	4	5	5
Gazo - 69	Gamo	Arba Minch Zuria	Chamo	Degree	Male	16 - 20 years	4	4	4	4	4	4	4	4	3	3
Gazo - 70	Gamo	Dita	Zada	Degree	Female	6 - 10 years	4	4	4	3	4	4	4	4	3	4
Gazo - 71	Gamo	Dita	Zada Secondary	Degree	Female	16 - 20 years	4	4	4	4	4	4	4	4	5	4
Gazo - 72	Gamo	Dita	Woyza	Degree	Female	6 -10 years	3	4	4	4	4	4	4	4	4	4
Gazo - 73	Gamo	Arba Minch Town	Gamo Bayra	MA	Female	over 20 years	4	4	4	4	4	5	4	4	3	4
Gazo - 74	Gamo	Dita	Zada Secondary	Degree	Male	6 - 10 years	4	3	4	4	4	3	4	3	3	3
Gazo - 75	Gamo	Dita	Dita Suluse	Degree	Male	6 - 10 years	5	4	4	5	5	5	4	5	5	5
Gazo - 77	Gamo	Chencha	Dorze	MA	Male	over 20 years	5	5	4	5	5	5	5	4	5	4
Gazo - 78	Gamo	Arba Minch Town	Arba Minch Comp.	MA	Male	over 20 years	4	4	4	4	4	4	5	5	5	5
Gazo - 79	Gamo	Arba Minch Town	Arba Minch Highschool	MA	Female	over 20 years	5	5	4	5	5	5	5	5	5	5
Gazo - 80	Gamo	Chencha	Dorze	Degree	Male	16 - 20 years	5	5	5	5	5	5	5	5	5	5
Gazo - 81	Gamo	Kamba	Kamba Secondary	Degree	Male	16 - 20 years	5	5	4	3	5	4	4	4	3	5
Gazo - 82	Gamo	Geressie Zuria	Danbile Ossa	Degree	Male	11 - 15 years	5	5	5	5	5	5	5	5	5	5
Gazo - 83	Gamo	Boreda	Gaga Gocho	Degree	Male	16 - 20 years	5	4	4	5	5	5	5	5	5	4
Gazo - 84	Gamo	Mirab Abaya	Mirab Abaya	Degree	Male	16 - 20 years	5	5	5	5	5	5	5	5	5	5
Gazo - 85	Gamo	Boreda	Kite	Degree	Male	11 - 15 years	5	5	5	5	5	5	5	5	5	5
Gazo - 86	Gamo	Gressie	Bola Zame	Degree	Female	11 -15 years	5	5	4	4	5	4	4	4	5	4
Gazo - 87	Gamo	Boreda	Gaga Gocho	Degree	Female	6 - 10 years	4	4	4	4	4	4	4	4	4	4
Gazo - 88	Gamo	Boreda	Boreda Seconday	Degree	Female	6 - 10 years	4	4	4	4	4	4	4	4	4	4
Gazo - 89	Gamo	Mirab Abaya	Umo Lante	Degree	Male	16 - 20 years	5	5	4	4	4	4	4	4	5	4
Gazo - 90	Gamo	Mirab Abaya	Umo Lante	Degree	Male	11 - 15 years	4	4	4	4	4	4	4	4	4	4
Gazo - 91	Gamo	Boreda	Boreda Seconday	MA	Male	over 20 years	5	5	5	5	5	5	5	5	5	5
Gazo - 92	Gamo	Boreda	Menusha Secondary	MA	Male	6 - 10 years	4	4	4	5	5	5	5	4	5	5
Gazo - 93	Gamo	Boreda	Boreda Seconday	Degree	Male	16 - 20 years	5	5	5	5	5	5	5	5	5	5
Gazo - 94	Gamo	Boreda	Boreda Seconday	MA	Male	11 - 15 years	4	4	4	4	3	4	4	4	4	4
Gazo - 95	Gamo	Birbir Town	Mirab Abaya S/S	MA	Male	11 - 15 years	2	2	4	3	4	4	4	4	4	3
Gazo - 96	Gamo	Birbir Town	Mirab Abaya S/S	MA	Male	16 - 20 years	5	4	5	4	5	4	4	5	4	5
Gazo - 97	Gamo	Boreda	Boreda Seconday	Degree	Male	over 20 years	4	4	4	5	5	5	5	5	4	4
Gazo - 98	Gamo	Bonke	Gazeso	Degree	Female	16 - 20 years	4	4	4	4	5	4	4	4	4	4
Gazo - 99	Gamo	Garda Marta	Qogale	Degree	Female	1 - 5 years	5	5	4	5	5	5	5	5	5	5
Gazo - 100	Gamo	Chencha	Shama	Degree	Male	11 - 15 years	5	5	4	5	5	4	4	5	5	5
Gazo - 101	Gamo	Kogota	Ezzo Secondary	Degree	Female	6 - 10 years	5	4	3	4	4	3	3	4	4	4
Gazo - 102	Gamo	Bonke	Kashaso	Degree	Male	11 - 15 years	5	4	4	4	5	4	4	4	4	5
Gazo - 103	Gamo	Bonke	Gazeso	Degree	Male	11 - 15 years	4	4	4	4	5	5	5	4	5	4
Gazo - 104	Gamo	Selamber Town	Selamber	MA	Male	16 - 20 years	5	5	5	5	4	5	5	4	5	5
Gazo - 105	Gamo	Qucha	S/S/School	Degree	Male	16 - 20 years	4	3	4	3	3	4	3	4	3	4
Gazo - 106	Gamo	Selamber Town	S/S/School	Degree	Male	11 - 15 years	4	3	4	4	3	5	5	4	5	4
Gazo - 107	Gamo	Kucha	Dinke Highschool	Degree	Female	11 - 15 years	3	3	4	3	4	3	3	3	3	4
Gazo - 108	Gamo	Arba Minch Town	Arba Minch	MA	Male	11 - 15 years	5	5	5	5	5	5	5	5	5	5
Gazo - 109	Gamo	Boreda	Boreda Seconday	Degree	Male	16 - 20 years	4	5	4	4	5	4	3	4	5	4
Gazo - 110	Gamo	Arba Minch	Arba Minch S/S	Degree	Male	over 20 years	5	5	2	3	5	5	4	4	4	5
Gazo - 111	Gamo	Arba Minch	Arba Minch	Degree	Male	over 20 years	4	4	4	3	4	4	4	5	4	4
Gazo - 114	Gamo	Arba Minch Town	Arba Minch S/S	Degree	Female	16 - 20 years	5	5	4	5	5	5	5	5	5	5
Gazo - 115	Gamo	Arba Minch Town	Chamo Secondary	MA	Female	over 20 years	5	5	4	5	5	5	5	5	5	5
Gazo - 116	Gamo	Bonke	Gazeso Secondary	Degree	Male	6 - 10 years	4	5	5	5	5	5	5	5	5	5
Gazo - 119	Gamo	Arba Minch	Abaya	Degree	Male	over 20 years	5	5	5	5	5	5	5	5	4	4
Gazo - 120	Gamo	Kogota	Ezzo Secondary	MA	Male	over 20 years	4	4	5	5	5	5	5	5	5	5
Gazo - 122	Gamo	Kogota	Ezzo Secondary	Degree	Male	16 - 20 years	5	5	4	4	5	5	4	5	4	5
Gazo - 123	Gamo	Kogota	Kogota	Degree	Male	6 - 10 years	4	4	4	5	5	5	4	4	4	4
Gazo - 124	Gamo	Arba Minch	Abaya	Degree	Female	16 - 20 years	5	5	5	5	4	5	5	5	5	5
Gazo - 125	Gamo	Arba Minch	Abaya Secondary	Degree	Male	over 20 years	5	5	4	4	5	5	5	4	5	4
Gazo - 126	Gamo	Birbir Town	Mirab Abaya S/S	MA	Female	over 20 years	1	3	4	3	4	4	3	3	3	4
Gazo - 127	Gamo	Birbir Town	Birbir S/S	MA	Female	over 20 years	4	5	5	5	5	5	5	5	5	5
Gazo - 128	Gamo	Kogota	Ezzo Secondary	Degree	Male	11 - 15 years	4	4	4	4	4	3	4	4	4	3
Gazo - 129	Gamo	Bonke	Baza	Degree	Male	1 - 5 years	5	5	4	5	5	5	5	4	5	5
Gazo - 130	Gamo	Arba Minch Zuria	Chano Dorga	Degree	Male	16 - 20 years	4	3	2	4	3	4	4	4	4	4
Gazo - 131	Gamo	Arba Minch	Abaya	Degree	Male	over 20 years	5	5	5	5	5	5	5	5	5	5
Gazo - 132	Gamo	Arba Minch Town	Chamo Secondary	MA	Male	over 20 years	4	4	4	5	5	5	4	4	5	5
Gazo - 133	Gamo	Arba Minch Town	Chamo Secondary	Degree	Male	16 -20 years	5	5	4	5	5	4	5	5	5	4
Gazo - 134	Gamo	Arba Minch Town	Arba Minch S/S	Degree	Male	over 20 years	5	5	5	5	5	5	5	5	5	5
Gazo - 135	Gamo	Mirab Abaya	Mirab Abaya S/S	MA	Male	over 20 years	5	5	5	5	5	5	5	5	5	5
Gazo - 136	Gamo	Daramallo	Wacha Secondary	MA	Male	over 20 years	4	5	4	5	5	4	4	3	5	4
KO - 1	Konso	Karat Town	Konso Highschool	Degree	Female	over 20 years	4	5	5	5	5	5	5	4	5	3
KO - 2	Konso	Karat Town	Konso Highschool	Degree	Female	11 - 15 years	5	5	5	5	5	5	5	5	5	5
KO - 3	Konso	Kena	Fasha Secondary	Degree	Male	11 - 15 years	4	5	4	4	4	4	4	5	4	4
KO - 4	Konso	Kolme Town	Kolme	Degree	Male	6 - 10 years	4	4	4	4	4	5	4	4	4	4
KO - 5	Konso	Karat Town	Konso Secondary	Degree	Male	11 - 15 years	4	5	5	4	5	4	5	4	5	4
KO - 6	Konso	Karat Town	Konso Secondary	Degree	Male	1 - 5 years	5	5	4	4	5	5	5	5	5	5
KO - 7	Konso	Karat Town	K/S/P/S	MA	Female	11 - 15 years	5	5	4	5	5	4	5	4	4	4
KO - 8	Konso	Kena	Fasha Secondary	Degree	Male	16 - 20 years	4	5	4	5	4	4	5	4	5	5
KO - 9	Konso	Karat Town	Konso Highschool	Degree	Male	over 20 years	4	5	4	4	4	5	4	4	4	5
KO - 10	Konso	Kena	Fasha Highschool	Degree	Male	11 - 15 years	5	5	5	5	5	5	5	5	5	5
KO - 11	Konso	Karat Zuria	Arsayide	Degree	Male	1 - 5 years	4	4	5	4	5	5	5	5	5	4
KO - 12	Konso	Karat Town	K/S/P/S	MA	Male	over 20 years	5	5	5	5	5	5	5	5	5	5
KO -13	Konso	Kena	Doha Secondary	Degree	Male	11 - 15 years	5	5	4	5	5	5	5	5	5	5
KO - 14	Konso	Kena	Doha Secondary	Degree	Male	over 20 years	5	5	5	5	5	5	5	5	5	5
KO - 15	Konso	Kena	Fasha Secondary	Degree	Male	over 20 years	4	4	3	4	4	3	4	3	4	3
KO - 16	Konso	Segen Zuria	Hailato Dokatu	Degree	Male	over 20 years	5	5	4	4	4	4	5	5	5	4
KO - 18	Konso	Kena	Fasha Secondary	Degree	Male	11 - 15 years	5	5	4	4	4	5	5	4	5	5
Kore - 1	Koore		Dohonso	Degree	Female	over 20 years	5	4	4	4	5	4	4	4	5	4
Kore - 2	Koore	Kelle Town	Kelle Secondary	Degree	Female	11 - 15 years	4	4	4	5	4	5	4	5	4	4
Kore - 3	Koore	Gorka	M/K/Dano	Degree	Male	6 - 10 years	5	5	4	4	5	5	4	4	5	5
Kore - 4	Koore	Kelle Town	Kelle Secondary	Degree	Male	over 20 years	1	1	1	1	3	4	1	1	1	1
Kore - 5	Koore	Gorka	Jijola M/S/S	Degree	Male	over 20 years	5	5	4	5	5	4	5	4	4	4
Kore - 6	Koore	Kelle Town	Kelle Secondary	MA	Male	16 - 20 years	4	5	5	5	5	5	4	4	4	5
Kore - 7	Koore	Gorka	Jijola M/S/S	Degree	Male	over 20 years	4	3	4	3	4	3	4	5	4	4
Kore - 8	Koore	Kelle Town	Kelle Secondary	Degree	Male	over 20 years	4	4	4	5	5	3	3	3	4	3
Kore - 9	Koore	Amaro	Dhonso	MA	Male	11 - 15 years	1	2	4	2	2	2	2	2	2	2
Kore - 10	Koore	Amaro	Dhonso	MA	Male	over 20 years	2	2	3	3	3	3	3	2	2	3
Kore - 11	Koore	Kelle Town	Dhonso	Degree	Male	over 20 years	5	5	4	5	5	4	4	4	5	4
Kore - 12	Koore	Kelle Town	Kelle Secondary	MA	Male	16 -20 years	4	4	4	5	4	5	4	4	4	4
Kore - 13	Koore	Gorka	Etate	Degree	Male	over 20 years	4	4	4	5	5	5	5	5	4	5
Kore - 14	Koore	Kelle Town	Dhonso	MA	Male	16 - 20 years	2	3	3	3	4	4	4	4	3	4
Kore - 15	Koore	Gorka	Jijola	Degree	Male	over 20 years	5	4	4	5	4	5	4	4	4	5
Kore - 16	Koore	Gorka	Dano	Degree	Male	11 - 15 years	4	4	4	4	3	3	4	3	4	4
Kore - 17	Koore	Gorka	Jijola	Degree	Female	6 - 10 years	4	3	4	4	3	4	4	3	3	5
Kore - 18	Koore	Kelle Town	Kelle Secondary	Degree	Male	6 - 10 years	5	5	5	5	5	5	5	5	5	5
Kore - 19	Koore	Gorka	Jijola	Degree	Male	6 - 10 years	5	5	5	5	5	5	5	5	5	5
Kore - 20	Koore	Kelle	Dhonso	MA	Male	6 - 10 years	5	5	5	4	5	5	5	5	4	4
Kore - 21	Koore	Gorka	Mesay Kasa Dano S/S	Degree	Male	6 - 12 years	5	5	5	4	5	5	5	5	5	5
Aari - 1	Aari	South Aari	Berka	Degree	Male	1 - 5 years	4	5	3	4	4	4	4	4	4	4
Aari - 2	Aari			Degree	Male	over 20 years	4	1	4	4	3	4	2	4	5	2
Aari - 3	Aari	Jinka	Meles Zenawi Memorial S/S	MA	Male	16 - 20 years	5	5	5	5	5	5	5	5	5	5
Aari - 4	Aari	Jinka Town Administration	Jinka Secondary School	Degree	Female	16 - 20 years	4	5	4	4	4	5	4	5	4	5
Aari - 6	Aari	Jinka Town Administration	Meles Zenawi Memorial S/S	MA	Male	over 20 years	5	5	5	4	5	5	5	5	5	5
Aari - 7	Aari	Semen Aari	Melorasha Secondary	Degree	Male	11 - 15 years	5	5	5	4	5	5	5	5	5	5
Aari - 8	Aari	Semen Aari	Gelila	Degree	Male	6 - 10 years	4	3	4	4	4	4	5	4	5	4
Aari - 9	Aari	Semen Aari	Gelila	MA	Male	6 - 10 years	5	5	5	5	5	5	5	5	5	5
Aari - 10	Aari	Jinka	Jinka High School	MA	Female	over 20 years	5	5	5	5	5	4	5	5	5	4
Aari - 11	Aari	Jinka	Meles Zenawi Memorial S/S	MA	Male	over 20 years	4	4	4	4	5	5	5	5	5	5
Aari - 12	Aari	South Aari	Goh	Degree	Male	16 - 20 years	3	4	4	4	4	4	4	4	4	4
Aari - 13	Aari	Jinka	Jinka M/S/S	MA	Male	11 - 15 years	5	5	5	5	4	4	5	5	5	5
Aari - 14	Aari	Jinka	Jinka	Degree	Male	over 20 years	4	3	3	4	4	3	4	3	3	3
Aari - 16	Aari	South Aari	Gorker	MA	Male	over 20 years	4	4	5	4	5	5	5	4	5	5
Aari - 17	Aari	Jinka		Degree	Male	11 - 15 years	4	4	4	4	3	5	4	4	4	4
Aari - 18	Aari	South Aari	Gorker	Degree	Female	11 - 15 years	5	5	5	5	5	4	5	5	5	5
Aari - 19	Aari	Jinka	Jinka M/S/S	Degree	Female	11 - 15 years	5	5	5	5	5	5	5	5	4	5
Aari - 20	Aari	Jinka	Jinka Secondary School	Degree	Male	over 20 years	4	4	4	5	5	5	5	4	5	4
Aari - 21	Aari	Jinka	Jinka Secondary School	Degree	Male	over 20 years	4	4	4	4	4	4	4	4	4	4
Aari - 22	Aari	South Aari	Goh	Degree	Male	2024-11-15	4	4	4	4	4	4	4	4	4	4
Aari - 24	Aari	Jinka	Jinka High School	Degree	Female	over 20 years	5	5	5	5	5	5	4	5	5	5
Aari -26	Aari	Baka-Dawla	Yetnebersh	Degree	Male	16 - 20 years	3	3	2	2	3	3	2	2	4	3
Aari - 27	Aari	Jinka	Jinka M/S/S	MA	Female	over 20 years	4	4	4	4	4	5	4	4	3	4
Gard - 1	Gardula	Derashe	Bussa Killa Secondary School	Degree	Female	1 - 5 years	4	4	4	4	4	4	4	4	4	4
Gard - 2	Gardula	Derashe	Gidole Secondary	MA	Male	16 - 20 Years	4	5	4	5	5	4	5	4	4	4
Gard - 3	Gardula	Derashe	Holte	Degree	Male	16 - 20 years	4	5	4	5	5	5	5	5	5	5
Gard - 4	Gardula	Derashe	Arguba	Degree	Male	1 - 5 years	4	5	3	5	5	4	5	5	5	4
Gard - 5	Gardula	Derashe	G/S/S/S	Degree	Female	over 20 years	5	5	5	5	5	5	5	5	5	5
Gard - 6	Gardula	Derashe	G/S/S/S	Degree	Female	over 20 years	4	5	5	5	5	5	5	5	5	5
Gard - 7	Gardula	Derashe	Gidole Secondary	MA	Male	over 20 years	5	5	5	5	5	5	5	4	5	5
Gard - 8	Gardula	Derashe	Gidole Prison Highschool	Degree	Male	over 20 years	5	5	5	5	5	5	5	5	5	5
Gard - 9	Gardula	Derashe	G/S/S/S	Degree	Male	over 20 years	5	4	4	4	5	5	4	4	4	4
Gard - 10	Gardula	Derashe	Gidole Prison Highschool	Degree	Male	1 - 15 years	5	4	3	4	4	5	4	3	4	4
Gard - 11	Gardula	Derashe	Gato	Degree	Male	1 - 5 years	4	4	4	5	5	4	5	5	4	5
Gard - 12	Gardula	Derashe	Shilale	Degree	Male	1 - 5 years	4	4	4	4	5	4	4	4	4	4
Gard - 13	Gardula	Derashe	Holte	Degree	Male	16 - 20 years	4	4	4	4	4	4	4	4	4	4
Gard - 14	Gardula	Derashe	Haybena	Degree	Male	over 20 years	5	5	4	4	5	5	5	5	4	5

## Sheet: Reading Skills
Code	Zone	Woreda	School Name	Educational Level	Sex	Teaching Experience	The Special Capacity Building Training Program helped me to identify the basic approaches to teaching reading skills	The Special Capacity Building Training Program helped me to share my reading skills experiences	The Special Capacity Building Training Program helped me to better understand the importance of reading skills for my student’s everyday life	The Special Capacity Building Training Program helped me to prepare reading skills lessons based on the new curriculum	The Special Capacity Building Training Program helped me to identify the core stages of teaching reading skills	The Special Capacity Building Training Program helped me to distinguish the main strategies used in each stage of teaching reading	The Special Capacity Building Training Program helped me to learn from my own experiences	The Special Capacity Building Training Program helped me to solve problems I usually encounter when teaching reading skills	The Special Capacity Building Training Program helped me to design better reading activities to improve students’ reading skills	The Special Capacity Building Training Program helped me to identify the key components of a reading skills lesson plan
BU-1	Burji	Soyama	S/S/S/S	Degree	Male	11-15 years	Agree	5	4	3	4	4	5	4	3	5
BU-2	Burji	Soyama	Shule	Degree	Male	6 -10 years	Strongly Agree	5	4	5	5	5	4	4	5	4
BU -3	Burji			MA	Male	16 -20 years	Agree	4	4	4	4	4	4	4	4	3
BU -4	Burji			Degree	Male	16-20 years	Agree	4	5	5	5	5	4	4	5	4
BU -5	Burji	Soyama	Akeye	Degree	Male	over 20 years	Agree	4	4	4	4	3	4	4	4	3
BU-6	Burji	Soyama	Soyama	Degree	Male	11 -15 years	Agree	4	4	4	4	3	4	4	4	4
BU -7	Burji	Soyama Town Administration	Soyama Secondary School	Degree	Male	over 20 years	Agree	4	3	4	4	4	4	3	4	4
BU -8	Burji	S/Zuria	Chuluse	Degree	Male	11 -15 years	Agree	4	3	4	4	4	4	4	4	4
BU -9	Burji	S/Zuria	Shule	Degree	Male	6 -10 years	Strongly Agree	5	5	5	5	5	5	4	5	5
BU -10	Burji	Soyama	Akia Secondary	Degree	Male	over 20 years	Strongly Agree	5	4	5	5	5	4	4	4	4
SO -1	South Omo	Hamer	D/M/S/S	Degree	Male	16 -20 years	Agree	2	4	2	5	4	4	4	5	5
SO -2	South Omo	Maale	Chaliti Secondary	Degree	Male	6 - 10 years	Strongly Agree	5	5	5	5	5	5	4	5	5
SO -3	South Omo	Aari	Jinka High School	Degree	Male	over 20 years	Strongly Agree	5	4	5	5	5	5	4	4	5
SO -4	South Omo	Maale	Koibe	Degree	Male	11 -15 years	Strongly Agree	4	1	4	5	5	1	1	4	4
SO -5	South Omo	Dassanech	Omo Tefasess	Degree	Female	6 - 10 years	Strongly Agree	5	4	5	5	5	5	4	5	4
SO -6	South Omo	Benna Tsemay	Kaho	Degree	Male	over 20 years	Agree	4	3	2	4	4	5	2	4	5
SO -7	South Omo	Benna Tsemay	Kako	Degree	Male	11 -15 years	Agree	4	3	2	4	4	5	2	4	5
SO -8	South Omo	Salamago	Gero	Degree	Male	1 - 5 years	Agree	5	5	3	4	4	5	4	4	5
SO - 9	South Omo	Hamer	Dimeka	Degree	Female	1 - 5 years	Undecided	1	1	2	4	4	4	3	4	4
Gazo -1	Gamo	Birbir Town	M/A/S/S	MA	Male	over 20 years	Strongly Agree	5	5	4	5	5	5	1	5	5
Gazo -2	Gamo	Boreda	Chilashe	Degree	Male	11 - 15 years	Agree	4	4	4	4	4	4	4	4	4
Gazo -3	Gamo	Boreda	Boreda Seconday	MA	Male	11 -15 years	4	4	4	5	4	4	4	4	4	4
Gazo -4	Gamo	Boreda	Boreda Seconday	Degree	Male	16 -20 years	5	4	5	4	4	4	4	4	5	5
Gazo -5	Gamo	Birbir Town	M/A/S/S	Degree	Male	over 20 years	4	4	4	4	4	4	5	3	4	4
Gazo -6	Gamo	Birbir Town	M/A/S/S	Degree	Male	over 20 years	4	4	4	3	3	4	4	4	4	4
Gazo -7	Gamo	Boreda	Boreda Seconday	MA	Male	16 -20 years	5	5	5	5	5	5	4	1	5	5
Gazo -8	Gamo	Boreda	Gaga Gocho	Degree	Male	16 -20 years	4	5	5	4	4	5	4	1	5	4
Gazo -9	Gamo	Boreda	Boreda Seconday	MA	Female	6 -10 years	4	4	4	1	4	4	4	1	1	4
Gazo -10	Gamo	Mirab Abaya	M/A/S/S	Degree	Female	over 20 years	5	4	4	5	5	4	4	4	5	5
Gazo -11	Gamo	Birbir Town	M/A/S/S	Degree	Male	16 -20 years	5	4	4	4	4	4	5	4	5	4
Gazo -12	Gamo	Boreda	Gaga Gocho	Degree	Male	11 -15 years	5	1	1	1	1	3	3	1	3	5
Gazo - 13	Gamo	Boreda	Boreda Seconday	Degree	Male	16 -20 years	5	5	5	5	5	5	5	5	5	5
Gazo - 14	Gamo	Boreda	Boreda Seconday	Degree	Male	over 20 years	3	4	4	4	4	4	3	4	4	3
Gazo - 15	Gamo	Boreda	Chilashe Secondary School	Degree	Male	6 - 10 years	4	4	5	5	3	4	3	3	4	3
Gazo - 16	Gamo	Geressie	Bola Zame	Degree	Female	1 -5 years	5	5	4	4	5	5	5	4	5	5
Gazo - 17	Gamo	Mirab Abaya	Ankober	MA	Male	16 -20 years	5	4	3	4	5	4	4	4	4	5
Gazo - 18	Gamo	Geressie	Durbe	Degree	Male	6 - 10 years	5	5	5	5	5	5	5	5	5	5
Gazo - 19	Gamo	Geressie Zuria	Danbile Otora Secondary	Degree	Male	11 - 15 years	4	4	4	5	5	4	4	4	4	5
Gazo - 20	Gamo	Mirab Abaya	Umo Lante	Degree	Male	6 - 10 years	5	5	5	5	5	5	5	5	5	5
Gazo - 21	Gamo	Boreda	Menkura	Degree	Male	16 - 20 years	5	5	5	5	5	5	5	4	4	5
Gazo - 22	Gamo	Boreda	Zefine Hidasse S.S.	Degree	Male	1 - 5 years	5	5	5	5	5	5	5	5	5	5
Gazo - 23	Gamo	Gressie Zuria	Danbile Otora Secondary	Degree	Male	6 - 10 years	5	5	4	5	5	4	4	4	5	5
Gazo - 24	Gamo	Geressie Zuria	Garbansa Ayche Secondary School	Degree	Male	11 -15 years	5	5	5	5	5	5	5	5	5	5
Gazo - 25	Gamo	Gressie	G/Ayche	Degree	Male	6 - 10 years	5	4	4	5	4	4	5	4	4	5
Gazo - 26	Gamo	Geressie	Bola Zame	Degree	Male	over 20 years	4	4	4	4	4	4	4	4	4	4
Gazo - 28	Gamo	Arba Minch	Arba Minch S/S	MA	Male	over 20 years	4	4	4	4	4	4	5	1	4	4
Gazo - 29	Gamo	Arba Minch	Arba Minch Limat S/S		Female	11 -15 years	5	5	5	5	5	5	5	4	4	4
Gazo - 30	Gamo	Daramallo	Wacha Secondary	Degree	Male	over 20 years	5	5	5	5	5	5	5	4	4	5
Gazo - 31	Gamo	Arba Minch	Arba Minch Prison	Degree	Female	16 - 20 years	5	5	5	5	5	5	4	4	4	4
Gazo - 32	Gamo	Gacho Baba	Zigiti Merche	Degree	Male	11 - 15 years	5	5	4	4	4	5	4	4	4	5
Gazo - 33	Gamo	Arba Minch		Degree	Female	16 - 20 years	5	5	5	5	5	5	5	5	5	5
Gazo - 34	Gamo	Arba Minch		MA	Female	1 - 5 years	5	5	5	5	5	5	5	5	5	5
Gazo - 35	Gamo	Mirab Abaya	Mirab	Degree	Male	over 20 years	4	4	4	4	4	4	4	4	4	4
Gazo -36	Gamo	Gacho Baba	Gatse	Degree	Female	1 - 5 years	4	4	4	4	3	3	5	4	2	2
Gazo - 37	Gamo	Geressie	Geressie High School	Degree	Male	11 - 15 years	5	5	5	5	5	5	4	4	4	5
Gazo - 38	Gamo	Gacho Baba	Z/Bakole	Degree	Male	16 - 20 years	4	4	4	4	4	4	4	4	4	4
Gazo - 39	Gamo	Mirab Abaya	Wajifo	Degree	Male	1 - 5 years	4	4	4	4	1	5	4	4	4	4
Gazo - 40	Gamo	Geressie	Medium School	Degree	Male	11 - 15 years	4	2	4	2	4	5	2	5	2	5
Gazo - 41	Gamo	Arba Minch Zuria	Sile Sira Primary	Degree	Female	16 - 20 years	2	4	2	2	2	3	2	2	4	4
Gazo - 42	Gamo	Gaucho Baba	Zigiti Bakole	MA	Male	16 - 20 years	5	5	5	5	5	5	5	5	2	5
Gazo - 43	Gamo	Geressie	Geressie S.S.	Degree	Female	16 - 20 years	5	5	5	5	5	5	5	4	4	4
Gazo - 44	Gamo	Kamba	Kamba	Degree	Male	16 - 20 years	5	4	4	5	5	5	5	4	4	5
Gazo - 46	Gamo	Arba Minch Zuria	Kola Shele	Degree	Male	11 - 15 years	4	3	3	2	4	4	3	2	2	3
Gazo - 47	Gamo	Arba Minch Zuria	Lante Primary	Degree	Female	6 - 10 years	5	4	4	3	4	4	4	4	3	4
Gazo - 48	Gamo	Mirab Abaya	Umo Lante	Degree	Female	6 - 10 years	3	4	4	4	2	4	2	4	4	2
Gazo - 49	Gamo	Boreda	Chillashe Allo	Degree	Female	11 - 15 years	5	4	2	4	5	5	4	5	4	4
Gazo - 50	Gamo	Mirab Abaya	Mirab Abaya	Degree	Male	11 - 15 years	5	5	5	5	5	5	5	5	5	5
Gazo - 51	Gamo	Dita	Zada	Degree	Female	16 - 20 years	5	5	4	3	4	5	4	4	4	4
Gazo - 52	Gamo	Kamba	Kamba Secondary	Degree	Male	over 20 years	5	5	5	5	5	5	5	5	5	5
Gazo - 53	Gamo	Chencha	Chencha S/S	MA	Male	16 - 20 years	5	4	3	5	5	5	4	3	5	4
Gazo - 54	Gamo	Gressie	Geressie High School	Degree	Male	16 - 20 years	1	1	2	1	1	1	1	1	1	1
Gazo - 55	Gamo	Chencha	Chencha S/S	Degree	Male	1 - 5 years	2	2	3	4	4	3	4	5	4	4
Gazo - 56	Gamo	Gacho Baba	Wusamo	Degree	Male	1 - 5 years	5	5	5	5	5	5	5	5	5	5
Gazo - 57	Gamo	Kamba	Kamba Secondary	Degree	Female	16 - 20 years	5	5	5	5	5	5	5	5	5	5
Gazo - 58	Gamo	Kamba	Kamba Secondary	MA	Male	16 - 20 years	5	5	5	5	5	5	5	5	5	5
Gazo - 59	Gamo	Kamba	Kamba Secondary	Degree	Male	16 - 20 years	5	5	5	5	5	5	5	5	5	5
Gazo - 60	Gamo	Kamba	Kamba Secondary	Degree	Male	6 - 10 years	4	4	4	4	4	3	3	3	4	4
Gazo - 61	Gamo	Dita	Zada Secondary	Degree	Female	6 - 10 years	5	5	5	5	5	5	5	5	5	5
Gazo - 62	Gamo	Dita	Zada Secondary	Degree	Male	6 - 10 years	3	3	2	2	1	4	3	3	3	2
Gazo - 63	Gamo	Arba Minch Zuria	Zeyse Elgo Secondary	Degree	Male	over 20 years	5	5	5	5	5	5	4	5	5	5
Gazo - 64	Gamo	Arba Minch Zuria	Kola Shele	Degree	Male	16 - 20 years	4	5	4	4	4	5	5	4	4	5
Gazo - 65	Gamo	Arba Minch Zuria	Lante	MA	Male	over 20 years	5	4	5	5	5	5	5	4	5	5
Gazo - 66	Gamo	Arba Minch Zuria	Shelle Mella Secondary	Degree	Male	over 20 years	5	5	5	5	5	5	5	5	5	5
Gazo - 67	Gamo	Arba Minch Zuria	Kama Zeyse	Degree	Male	over 20 years	5	5	5	5	5	5	5	5	5	5
Gazo - 68	Gamo	Dita	Zada Secondary	Degree	Male	16 - 20 years	5	5	5	5	5	5	5	5	5	5
Gazo - 69	Gamo	Arba Minch Zuria	Chamo	Degree	Male	16 - 20 years	3	4	4	4	4	4	4	4	4	3
Gazo - 70	Gamo	Dita	Zada	Degree	Female	6 - 10 years	4	4	4	4	4	4	4	4	3	4
Gazo - 71	Gamo	Dita	Zada Secondary	Degree	Female	16 - 20 years	4	4	4	5	5	5	4	3	4	5
Gazo - 72	Gamo	Dita	Woyza	Degree	Female	6 -10 years	4	4	4	4	4	4	4	4	4	5
Gazo - 73	Gamo	Arba Minch Town	Gamo Bayra	MA	Female	over 20 years	4	5	5	5	5	5	4	3	3	4
Gazo - 74	Gamo	Dita	Zada Secondary	Degree	Male	6 - 10 years	4	3	5	3	4	4	5	4	4	4
Gazo - 75	Gamo	Dita	Dita Suluse	Degree	Male	6 - 10 years	5	5	5	5	4	4	5	5	5	4
Gazo - 77	Gamo	Chencha	Dorze	MA	Male	over 20 years	5	4	4	4	4	4	5	4	4	5
Gazo - 78	Gamo	Arba Minch Town	Arba Minch Comp.	MA	Male	over 20 years	4	4	4	5	4	4	4	4	4	4
Gazo - 79	Gamo	Arba Minch Town	Arba Minch Highschool	MA	Female	over 20 years	5	5	5	5	5	5	5	4	5	3
Gazo - 80	Gamo	Chencha	Dorze	Degree	Male	16 - 20 years	4	4	4	4	4	4	4	4	4	4
Gazo - 81	Gamo	Kamba	Kamba Secondary	Degree	Male	16 - 20 years	3	4	5	4	4	4	4	4	4	4
Gazo - 82	Gamo	Geressie Zuria	Danbile Ossa	Degree	Male	11 - 15 years	5	5	4	5	5	5	5	5	5	5
Gazo - 83	Gamo	Boreda	Gaga Gocho	Degree	Male	16 - 20 years	4	5	4	4	5	5	4	4	4	4
Gazo - 84	Gamo	Mirab Abaya	Mirab Abaya	Degree	Male	16 - 20 years	5	5	5	5	5	5	5	5	5	5
Gazo - 85	Gamo	Boreda	Kite	Degree	Male	11 - 15 years	4	5	5	5	5	5	5	4	4	5
Gazo - 86	Gamo	Gressie	Bola Zame	Degree	Female	11 -15 years	4	4	5	4	4	4	4	4	4	4
Gazo - 87	Gamo	Boreda	Gaga Gocho	Degree	Female	6 - 10 years	4	4	4	4	4	4	4	4	4	3
Gazo - 88	Gamo	Boreda	Boreda Seconday	Degree	Female	6 - 10 years	4	4	4	4	4	4	4	4	4	4
Gazo - 89	Gamo	Mirab Abaya	Umo Lante	Degree	Male	16 - 20 years	4	5	5	4	4	3	3	5	4	5
Gazo - 90	Gamo	Mirab Abaya	Umo Lante	Degree	Male	11 - 15 years	5	4	4	4	5	5	4	4	5	5
Gazo - 91	Gamo	Boreda	Boreda Seconday	MA	Male	over 20 years	5	5	4	5	5	5	4	4	4	5
Gazo - 92	Gamo	Boreda	Menusha Secondary	MA	Male	6 -10 years	5	5	5	5	5	5	5	4	5	5
Gazo - 93	Gamo	Boreda	Boreda Seconday	Degree	Male	16 - 20 years	5	5	5	5	5	5	5	5	5	5
Gazo - 94	Gamo	Boreda	Boreda Seconday	MA	Male	11 - 15 years	4	4	4	4	3	3	4	2	3	3
Gazo - 95	Gamo	Birbir Town	Mirab Abaya S/S	MA	Male	11 - 15 years	4	3	3	4	4	4	4	2	2	4
Gazo - 96	Gamo	Birbir Town	Mirab Abaya S/S	MA	Male	16 - 20 years	5	5	4	5	4	4	4	5	4	5
Gazo - 97	Gamo	Boreda	Boreda Seconday	Degree	Male	over 20 years	4	5	3	4	5	4	5	4	5	4
Gazo - 98	Gamo	Bonke	Gazeso	Degree	Female	16 - 20 years	5	4	5	5	4	4	4	4	5	4
Gazo - 99	Gamo	Garda Marta	Qogale	Degree	Female	1 - 5 years	5	4	4	5	5	4	4	4	4	4
Gazo - 100	Gamo	Chencha	Shama	Degree	Male	11 - 15 years	5	4	5	5	5	5	4	3	5	5
Gazo - 101	Gamo	Kogota	Ezzo Secondary	Degree	Female	6 - 10 years	4	4	4	3	5	5	5	3	5	4
Gazo - 102	Gamo	Bonke	Kashaso	Degree	Male	11 - 15 years	4	4	4	4	4	4	4	4	4	4
Gazo - 103	Gamo	Bonke	Gazeso	Degree	Male	11 - 15 years	4	5	4	5	5	5	4	5	5	5
Gazo - 104	Gamo	Selamber Town	Selamber	MA	Male	16 - 20 years	5	5	4	5	5	5	4	4	4	4
Gazo - 105	Gamo	Qucha	S/S/School	Degree	Male	16 - 20 years	4	3	3	4	3	4	3	4	3	4
Gazo - 106	Gamo	Selamber Town	S/S/School	Degree	Male	11 - 15 years	4	5	4	4	5	5	5	4	3	3
Gazo - 107	Gamo	Kucha	Dinke Highschool	Degree	Female	11 - 15 years	4	3	4	3	4	4	4	4	4	3
Gazo - 108	Gamo	Arba Minch Town	Arba Minch	MA	Male	11 - 15 years	5	5	5	5	5	5	5	5	5	5
Gazo - 109	Gamo	Boreda	Boreda Seconday	Degree	Male	16 - 20 years	4	5	4	4	5	4	4	4	3	4
Gazo - 110	Gamo	Arba Minch	Arba Minch S/S	Degree	Male	over 20 years	5	5	4	4	2	4	4	4	5	5
Gazo - 111	Gamo	Arba Minch	Arba Minch	Degree	Male	over 20 years	4	4	3	4	4	5	3	3	4	5
Gazo - 114	Gamo	Arba Minch Town	Arba Minch S/S	Degree	Female	16 - 20 years	5	5	5	5	5	5	5	4	5	5
Gazo - 115	Gamo	Arba Minch Town	Chamo Secondary	MA	Female	over 20 years	5	5	5	5	5	5	5	4	5	5
Gazo - 116	Gamo	Bonke	Gazeso Secondary	Degree	Male	6 - 10 years	5	5	5	5	5	5	5	4	5	5
Gazo - 119	Gamo	Arba Minch	Abaya	Degree	Male	over 20 years	4	5	4	4	4	4	5	4	4	5
Gazo - 120	Gamo	Kogota	Ezzo Secondary	MA	Male	over 20 years	5	5	5	5	5	5	5	5	4	5
Gazo - 122	Gamo	Kogota	Ezzo Secondary	Degree	Male	16 - 20 years	4	5	5	5	5	5	4	4	4	5
Gazo - 123	Gamo	Kogota	Kogota	Degree	Male	6 - 10 years	4	4	4	5	4	4	4	3	4	4
Gazo - 124	Gamo	Arba Minch	Abaya	Degree	Female	16 - 20 years	5	5	4	5	5	5	4	5	5	5
Gazo - 125	Gamo	Arba Minch	Abaya Secondary	Degree	Male	over 20 years	5	5	5	5	5	5	4	4	4	5
Gazo - 126	Gamo	Birbir Town	Mirab Abaya S/S	MA	Female	over 20 years	1	3	3	4	3	3	3	3	3	3
Gazo - 127	Gamo	Birbir Town	Birbir S/S	MA	Female	over 20 years	5	4	4	4	5	4	5	4	4	5
Gazo - 128	Gamo	Kogota	Ezzo Secondary	Degree	Male	11 - 15 years	5	5	5	5	5	5	4	4	4	4
Gazo - 129	Gamo	Bonke	Baza	Degree	Male	1 - 5 years	5	5	5	4	5	5	4	4	5	5
Gazo - 130	Gamo	Arba Minch Zuria	Chano Dorga	Degree	Male	16 - 20 years	4	4	4	4	4	4	4	4	4	4
Gazo - 131	Gamo	Arba Minch	Abaya	Degree	Male	over 20 years	5	5	5	4	5	5	5	5	5	4
Gazo - 132	Gamo	Arba Minch Town	Chamo Secondary	MA	Male	over 20 years	5	5	5	5	5	5	4	54	5	5
Gazo - 133	Gamo	Arba Minch Town	Chamo Secondary	Degree	Male	16 -20 years	5	5	5	5	5	5	5	4	4	5
Gazo - 134	Gamo	Arba Minch Town	Arba Minch S/S	Degree	Male	over 20 years	5	5	5	5	5	5	5	5	5	5
Gazo - 135	Gamo	Mirab Abaya	Mirab Abaya S/S	MA	Male	over 20 years	5	5	4	5	5	5	5	4	5	5
Gazo - 136	Gamo	Daramallo	Wacha Secondary	MA	Male	over 20 years	5	5	4	5	4	3	4	3	4	5
KO - 1	Konso	Karat	Karat	Degree	Female	over 20 years	5	5	5	5	5	4	5	4	4	5
KO - 2	Konso	Karat	Konso Highschool	Degree	Female	11 - 15 years	5	5	4	5	5	5	5	5	5	5
KO - 3	Konso	Kena	Fasha Secondary	Degree	Male	11 - 15 years	5	5	5	5	4	4	4	4	4	4
KO - 4	Konso	Kolme	Kolme	Degree	Male	6 - 10 years	4	4	4	4	4	4	4	4	4	4
KO - 5	Konso	Karat Town	Konso Secondary	Degree	Male	11 - 15 years	3	5	4	5	4	5	4	5	4	5
KO -6	Konso	Karat	Konso Secondary	Degree	Male	1 - 5 years	5	5	5	5	5	5	5	5	5	5
KO - 7	Konso	Karat Town	K/S/P/S	MA	Female	11 - 15 years	5	5	5	5	4	4	5	3	4	5
KO - 8	Konso	Kena	Fasha Secondary	Degree	Male	16 - 20 years	4	5	5	4	5	4	4	4	4	4
KO - 9	Konso	Karat Town	Konso Highschool	Degree	Male	over 20 years	4	4	4	5	5	5	5	4	4	4
KO - 10	Konso	Kena	Fasha Highschool	Degree	Male	11 - 15 years	5	5	5	5	5	5	5	5	5	4
KO - 11	Konso	Karat Zuria	Arsayide	Degree	Male	1 - 5 years	5	5	5	4	5	5	5	5	5	5
KO - 12	Konso	Karat Town	K/S/P/S	MA	Male	over 20 years	5	5	5	5	5	5	5	5	5	5
KO -13	Konso	Kena	Doha Secondary	Degree	Male	11 - 15 years	5	5	5	5	5	5	5	5	5	5
KO - 14	Konso	Kena	Doha Secondary	Degree	Male	over 20 years	5	5	5	5	4	5	5	5	5	5
KO - 15	Konso	Kena	Fasha Secondary	Degree	Male	over 20 years	3	4	3	4	4	3	3	3	3	4
KO - 16	Konso	Segen Zuria	Hailato Dokatu	Degree	Male	over 20 years	4	5	5	4	4	5	5	5	5	5
KO - 18	Konso	Kena	Fasha Secondary	Degree	Male	11 - 15 years	4	4	4	5	5	4	5	5	5	5
Kore - 1	Koore		Dohonso	Degree	Female	over 20 years	4	4	4	4	4	4	5	4	4	5
Kore - 2	Koore		Kelle	Degree	Female	11 - 15 years	4	3	5	4	3	4	5	4	4	3
Kore - 3	Koore	Gorka	M/K/Dano	Degree	Male	6 - 10 years	5	4	4	4	4	5	5	4	5	5
Kore - 4	Koore	Kelle Town	Kelle Secondary	Degree	Male	over 20 years	1	1	1	1	1	11	1	1	1	1
Kore - 5	Koore	Gorka	Jojola M/S/S	Degree	Male	over 20 years	5	5	4	5	5	5	4	4	4	5
Kore - 6	Koore	Kelle Town	Kelle Secondary	MA	Male	16 - 20 years	4	5	5	5	5	4	5	5	5	5
Kore - 7	Koore	Gorka	Jojola M/S/S	Degree	Male	over 20 years	5	5	4	5	4	4	4	4	5	4
Kore - 8	Koore	Kelle Town	Kelle Secondary	Degree	Male	over 20 years	3	4	2	4	4	3	3	3	4	4
Kore - 9	Koore		Dhanso	MA	Male	11 - 15 years	2	2	3	4	2	2	2	2	3	2
Kore - 10	Koore	Amaro	Dhonse	MA	Male	over 20 years	2	2	2	3	3	3	3	3	4	4
Kore - 11	Koore	Kelle Town	Dhonso	Degree	Male	over 20 years	5	5	4	4	4	4	5	3	3	4
Kore - 12	Koore	Kelle Town	Kelle Secondary	MA	Male	16 -20 years	4	5	1	4	1	1	4	3	4	1
Kore - 13	Koore	Gorka	Etate	Degree	Male	over 20 years	5	5	5	4	5	5	5	4	5	5
Kore - 14	Koore	Kelle Town	Dhonso	MA	Male	16 - 20 years	4	4	2	1	2	2	3	3	3	3
Kore - 15	Koore	Gorka	Jijola	Degree	Male	over 20 years	4	4	5	5	5	5	5	4	5	5
Kore - 16	Koore	Gorka	Dano	Degree	Male	11 - 15 years	4	4	4	4	3	3	3	4	4	4
Kore - 17	Koore	Gorka	Jijola	Degree	Female	6 - 10 years	4	3	3	3	4	5	5	5	4	5
Kore - 18	Koore	Kelle Town	Kelle Secondary	Degree	Male	6 - 10 years	5	4	4	5	5	4	4	4	5	4
Kore - 19	Koore	Gorka	Jijola	Degree	Male	6 - 10 years	5	5	5	5	4	5	5	5	5	5
Kore - 20	Koore	Kelle	Dhonso	MA	Male	6 - 10 years	5	5	5	5	5	5	4	4	4	5
Kore - 21	Koore	Gorka	Mesay Kasa Dano S/S	Degree	Male	6 - 12 years	4	5	4	4	5	5	4	4	4	5
Aari - 1	Aari	South Aari	Berka	Degree	Male	1 - 5 years	5	4	4	5	5	5	5	5	4	4
Aari - 2	Aari			Degree	Male	over 20 years	3	3	2	4	1	3	1	1	1	2
Aari - 3	Aari	Jinka	Meles Zenawi Memorial S/S	MA	Male	16 - 20 years	5	5	5	5	5	5	5	5	5	5
Aari - 4	Aari	Jinka Town Administration	Jinka Secondary School	Degree	Female	16 - 20 years	5	4	4	4	4	4	5	4	4	5
Aari - 6	Aari	Jinka Town Administration	Meles Zenawi Memorial S/S	MA	Male	over 20 years	5	5	5	5	5	5	4	4	4	4
Aari - 7	Aari	Semen Aari	Melorasha Secondary	Degree	Male	11 - 15 years	5	4	5	5	5	5	4	4	5	5
Aari - 8	Aari	Semen Aari	Gelila	Degree	Male	6 - 10 years	5	5	4	4	5	4	5	5	5	5
Aari - 9	Aari	Semen Aari	Gelila	MA	Male	6 - 10 years	5	5	5	5	5	5	5	5	5	5
Aari - 10	Aari	Jinka	Jinka High School	MA	Female	over 20 years	5	5	5	5	5	5	5	4	5	5
Aari - 11	Aari	Jinka	Meles Zenawi Memorial S/S	MA	Male	over 20 years	5	4	4	5	5	5	5	4	5	5
Aari - 12	Aari	South Aari	Goh	Degree	Male	16 - 20 years	4	4	5	5	5	5	5	5	5	5
Aari - 13	Aari	Jinka	Jinka M/S/S	MA	Male	11 - 15 years	5	5	5	3	5	4	5	5	5	5
Aari - 14	Aari	Jinka	Jinka	Degree	Male	over 20 years	3	3	3	3	3	3	4	4	4	4
Aari - 16	Aari	South Aari	Gorker	MA	Male	over 20 years	5	4	4	5	5	4	4	5	4	5
Aari - 17	Aari	Jinka		Degree	Male	11 - 15 years	4	4	4	5	4	4	4	4	4	4
Aari - 18	Aari	South Aari	Gorker	Degree	Female	11 - 15 years	5	5	5	5	5	5	5	5	5	5
Aari - 19	Aari	Jinka	Jinka M/S/S	Degree	Female	11 - 15 years	5	5	5	5	5	5	5	4	5	5
Aari - 20	Aari	Jinka	Jinka Secondary School	Degree	Male	over 20 years	4	5	5	4	5	5	4	5	4	5
Aari - 21	Aari	Jinka	Jinka Secondary School	Degree	Male	over 20 years	4	4	4	4	4	4	4	3	4	4
Aari - 22	Aari	South Aari	Goh	Degree	Male	2024-11-15	4	4	4	4	4	4	4	4	4	4
Aari - 24	Aari	Jinka	Jinka High School	Degree	Female	over 20 years	5	5	5	5	5	5	4	4	4	5
Aari -26	Aari	Baka-Dawla	Yetnebersh	Degree	Male	16 - 20 years	3	3	4	3	4	2	4	4	4	3
Aari - 27	Aari	Jinka	Jinka M/S/S	MA	Female	over 20 years	4	5	5	5	5	5	4	4	4	4
Gard - 1	Gardula	Derashe	Bussa Killa Secondary School	Degree	Female	1 - 5 years	4	4	4	3	4	4	4	4	4	4
Gard - 2	Gardula	Derashe	Gidole Secondary	MA	Male	16 - 20 Years	5	4	5	4	5	5	4	4	4	5
Gard - 3	Gardula	Derashe	Holte	Degree	Male	16 - 20 years	4	4	5	5	5	5	5	5	5	5
Gard - 4	Gardula	Derashe	Arguba	Degree	Male	1 - 5 years	5	4	3	5	5	4	5	4	3	5
Gard - 5	Gardula	Derashe	G/S/S/S	Degree	Female	over 20 years	5	5	5	5	5	5	5	5	5	5
Gard - 6	Gardula	Derashe	G/S/S/S	Degree	Female	over 20 years	5	5	5	5	5	5	5	5	5	5
Gard - 7	Gardula	Derashe	Gidole Secondary	MA	Male	over 20 years	5	5	5	5	5	5	5	4	5	5
Gard - 8	Gardula	Derashe	Gidole Prison Highschool	Degree	Male	over 20 years	5	5	5	5	5	5	5	4	5	5
Gard - 9	Gardula	Derashe	G/S/S/S	Degree	Male	over 20 years	5	4	5	5	5	5	4	4	4	5
Gard - 10	Gardula	Derashe	Gidole Prison Highschool	Degree	Male	1 - 5 years	5	2	4	5	5	5	3	3	4	5
Gard - 11	Gardula	Derashe	Gato	Degree	Male	1 - 5 years	5	5	4	5	5	4	4	4	4	5
Gard - 12	Gardula	Derashe	Shilale	Degree	Male	1 - 5 years	4	4	4	4	5	4	4	4	4	4
Gard - 13	Gardula	Derashe	Holte	Degree	Male	16 - 20 years	4	4	4	4	4	4	4	4	4	4
Gard - 14	Gardula	Derashe	Haybena	Degree	Male	over 20 years	5	4	4	5	5	5	5	5	4	5

## Sheet: Writing Skills
Code	Zone	Woreda	School Name	Educational Level	Sex	Teaching Experience	The Special Capacity Building Training Program helped me to conceptualize the distinctive nature of writing skills	The Special Capacity Building Training Program helped me to identify the key approaches to teaching writing skills	The Special Capacity Building Training Program helped me to identify the different stages of teaching writing skills	The Special Capacity Building Training Program helped me to share my experience and understanding of teaching writing skills	The Special Capacity Building Training Program helped me to comment on the appropriateness of the reading lesson activities/tasks	The Special Capacity Building Training Program helped me to improve the teaching methods I use to teach writing skills	The Special Capacity Building Training Program helped me to experience the practical implementation of teaching a writing skills lesson	The Special Capacity Building Training Program helped me to prepare better writing skills lesson plans	The Special Capacity Building Training Program helped me to incorporate all the elements necessary in my writing skills lesson	The Special Capacity Building Training Program helped me to implement writing skills lessons effectively
BU-1	Burji	Soyama	S/S/S/S	Degree	Male	11-15 years	4	4	5	5	4	4	4	5	5	4
BU-2	Burji	Soyama	Shule	Degree	Male	6 -10 years	5	5	4	4	4	5	4	4	5	5
BU -3	Burji			MA	Male	16 -20 years	5	5	4	5	4	4	4	5	5	4
BU -4	Burji			Degree	Male	16-20 years	5	5	4	5	5	4	5	5	5	5
BU -5	Burji	Soyama	Akeye	Degree	Male	over 20 years	4	4	4	4	4	3	4	3	3	4
BU-6	Burji	Soyama	Soyama	Degree	Male	11 -15 years	3	3	4	4	2	4	4	3	3	3
BU -7	Burji	Soyama Town Administration	Soyama Secondary School	Degree	Male	over 20 years	4	4	4	3	3	4	3	3	4	3
BU -8	Burji	S/Zuria	Chuluse	Degree	Male	11 -15 years	4	4	4	4	5	4	4	4	4	4
BU -9	Burji	S/Zuria	Shule	Degree	Male	6 -10 years	4	5	5	5	5	5	5	5	5	5
BU -10	Burji	Soyama	Akia Secondary	Degree	Male	over 20 years	4	4	5	5	4	4	4	5	5	4
SO -1	South Omo	Hamer	D/M/S/S	Degree	Male	16 -20 years	4	4	5	5	4	5	4	5	5	5
SO -2	South Omo	Maale	Chaliti Secondary	Degree	Male	6 - 10 years	4	5	5	4	5	4	4	4	4	4
SO -3	South Omo	Aari	Jinka High School	Degree	Male	over 20 years	4	5	5	5	4	5	5	5	5	4
SO -4	South Omo	Maale	Koibe	Degree	Male	11 -15 years	2	5	5	5	4	4	4	4	5	4
SO -5	South Omo	Dassanech	Omo Tefasess	Degree	Female	6 - 10 years	5	5	5	4	5	4	4	5	4	5
SO -6	South Omo	Benna Tsemay	Kaho	Degree	Male	over 20 years	4	4	4	3	3	3	4	4	4	3
SO -7	South Omo	Benna Tsemay	Kako	Degree	Male	11 -15 years	4	4	4	3	3	3	4	4	4	3
SO -8	South Omo	Salamago	Gero	Degree	Male	1 - 5 years	4	4	5	5	4	5	5	5	5	4
SO - 9	South Omo	Hamer	Dimeka	Degree	Female	1 - 5 years	3	1	1	2	4	4	4	3	4	4
Gazo -1	Gamo	Birbir Town	M/A/S/S	MA	Male	over 20 years	5	5	5	5	4	5	5	4	4	5
Gazo -2	Gamo	Boreda	Chilashe	Degree	Male	11 - 15 years	4	4	5	5	5	Agree	4	4	4	4
Gazo -3	Gamo	Boreda	Boreda Seconday	MA	Male	11 -15 years	4	4	4	5	4	4	4	4	4	4
Gazo -4	Gamo	Boreda	Boreda Seconday	Degree	Male	16 -20 years	5	4	5	4	4	4	4	4	5	5
Gazo -5	Gamo	Birbir Town	M/A/S/S	Degree	Male	over 20 years	4	4	4	4	4	4	4	4	4	4
Gazo -5	Gamo	Birbir Town	M/A/S/S	Degree	Male	over 20 years	4	4	4	4	4	4	4	4	4	4
Gazo -7	Gamo	Boreda	Boreda Seconday	MA	Male	16 -20 years	5	5	5	5	5	5	5	5	5	5
Gazo -8	Gamo	Boreda	Gaga Gocho	Degree	Male	16 -20 years	4	5	5	5	5	5	4	5	5	5
Gazo -9	Gamo	Boreda	Boreda Seconday	MA	Female	6 -10 years	1	1	1	4	4	4	4	4	4	2
Gazo -10	Gamo	Mirab Abaya	M/A/S/S	Degree	Female	over 20 years	4	5	5	5	4	4	5	4	4	3
Gazo -11	Gamo	Birbir Town	M/A/S/S	Degree	Male	16 -20 years	4	4	4	4	5	5	4	5	4	5
Gazo -12	Gamo	Boreda	Gaga Gocho	Degree	Male	11 -15 years	5	4	4	4	4	5	5	4	4	4
Gazo - 13	Gamo	Boreda	Boreda Seconday	Degree	Male	16 -20 years	5	5	5	5	5	5	5	5	5	5
Gazo - 14	Gamo	Boreda	Boreda Seconday	Degree	Male	over 20 years	3	4	4	4	4	4	3	4	4	3
Gazo - 15	Gamo	Boreda	Chilashe Secondary School	Degree	Male	6 - 10 years	4	4	4	5	5	5	5	5	5	5
Gazo - 16	Gamo	Geressie	Bola Zame	Degree	Female	1 -5 years	5	5	5	5	4	4	4	4	5	4
Gazo - 17	Gamo	Mirab Abaya	Ankober	MA	Male	16 -20 years	4	4	5	4	4	4	4	5	4	5
Gazo - 18	Gamo	Geressie	Durbe	Degree	Male	6 - 10 years	4	5	5	5	5	5	5	5	5	5
Gazo - 19	Gamo	Geressie Zuria	Danbile Otora Secondary	Degree	Male	11 - 15 years	4	4	5	4	4	5	4	5	4	4
Gazo - 20	Gamo	Mirab Abaya	Umo Lante	Degree	Male	6 - 10 years	4	4	4	4	4	4	3	4	5	4
Gazo - 21	Gamo	Boreda	Menkura	Degree	Male	16 - 20 years	5	5	5	5	5	5	5	4	4	5
Gazo - 22	Gamo	Boreda	Zefine Hidasse S.S.	Degree	Male	1 - 5 years	5	5	5	5	5	5	5	5	5	5
Gazo - 23	Gamo	Gressie Zuria	Danbile Otora Secondary	Degree	Male	6 - 10 years	4	4	4	4	4	5	5	5	4	5
Gazo - 24	Gamo	Geressie Zuria	Garbansa Ayche Secondary School	Degree	Male	11 -15 years	5	5	5	5	5	5	5	5	5	5
Gazo - 25	Gamo	Gressie	G/Ayche	Degree	Male	6 - 10 years	4	5	5	5	4	4	5	5	5	4
Gazo - 26	Gamo	Geressie	Bola Zame	Degree	Male	over 20 years	4	4	4	4	4	4	4	4	4	4
Gazo - 28	Gamo	Arba Minch	Arba Minch S/S	MA	Male	over 20 years	4	4	4	4	5	4	4	4	4	4
Gazo - 29	Gamo	Arba Minch	Arba Minch Limat S/S		Female	11 -15 years	4	4	4	5	4	5	4	4	5	4
Gazo - 30	Gamo	Daramallo	Wacha Secondary	Degree	Male	over 20 years	5	5	5	5	5	5	5	5	5	5
Gazo - 31	Gamo	Arba Minch	Arba Minch Prison	Degree	Female	16 - 20 years	5	5	5	4	4	4	4	4	4	5
Gazo - 32	Gamo	Gacho Baba	Zigiti Merche	Degree	Male	11 - 15 years	4	4	4	4	4	4	4	4	4	4
Gazo - 33	Gamo	Arba Minch		Degree	Female	16 - 20 years	5	5	5	5	5	5	5	5	5	5
Gazo - 34	Gamo	Arba Minch		MA	Female	1 - 5 years	5	5	5	5	5	5	5	5	5	5
Gazo - 35	Gamo	Mirab Abaya	Mirab	Degree	Male	over 20 years	4	5	5	4	5	5	5	4	4	4
Gazo -36	Gamo	Gacho Baba	Gatse	Degree	Female	1 - 5 years	4	2	3	4	2	3	3	4	4	4
Gazo - 37	Gamo	Geressie	Geressie High School	Degree	Male	11 - 15 years	4	4	5	5	4	4	4	5	5	4
Gazo - 38	Gamo	Gacho Baba	Z/Bakole	Degree	Male	16 - 20 years	4	4	4	4	4	4	4	4	4	4
Gazo - 39	Gamo	Mirab Abaya	Wajifo	Degree	Male	1 - 5 years	2	4	4	4	4	4	4	4	4	4
Gazo - 40	Gamo	Geressie	Medium School	Degree	Male	11 - 15 years	5	5	2	5	5	4	4	4	5	4
Gazo - 41	Gamo	Arba Minch Zuria	Sile Sira Primary	Degree	Female	16 - 20 years	2	2	2	3	4	2	4	2	3	2
Gazo - 42	Gamo	Gacho Baba	Zigiti Bakole	MA	Male	16 - 20 years	4	4	5	5	5	5	5	5	5	5
Gazo - 43	Gamo	Geressie	Geressie S.S.	Degree	Female	16 - 20 years	5	5	5	5	5	5	5	5	5	5
Gazo - 44	Gamo	Kamba	Kamba	Degree	Male	16 - 20 years	5	4	4	5	4	5	5	5	4	5
Gazo - 46	Gamo	Arba Minch Zuria	Kola Shele	Degree	Male	11 - 15 years	3	2	4	2	2	3	2	4	4	3
Gazo - 47	Gamo	Arba Minch Zuria	Lante Primary	Degree	Female	6 - 10 years	3	4	4	4	3	4	4	4	4	4
Gazo - 48	Gamo	Mirab Abaya	Umo Lante	Degree	Female	6 - 10 years	5	5	2	4	5	2	1	4	4	4
Gazo - 49	Gamo	Boreda	Chillashe Allo	Degree	Female	11 - 15 years	4	5	5	4	4	5	4	4	5	4
Gazo - 50	Gamo	Mirab Abaya	Mirab Abaya	Degree	Male	11 - 15 years	5	5	5	5	5	5	5	5	5	5
Gazo - 51	Gamo	Dita	Zada	Degree	Female	16 - 20 years	5	5	5	4	4	5	5	5	5	4
Gazo - 52	Gamo	Kamba	Kamba Secondary	Degree	Male	over 20 years	5	5	5	5	5	5	5	5	5	5
Gazo - 54	Gamo	Gressie	Geressie High School	Degree	Male	16 - 20 years	5	2	2	2	1	2	1	2	2	2
Gazo - 55	Gamo	Chencha	Chencha S/S	Degree	Male	1 - 5 years	3	3	2	2	3	3	2	2	4	4
Gazo - 56	Gamo	Gacho Baba	Wusamo	Degree	Male	1 - 5 years	5	5	5	5	5	5	5	5	5	5
Gazo - 57	Gamo	Kamba	Kamba Secondary	Degree	Female	16 - 20 years	5	5	5	5	4	4	5	5	5	5
Gazo - 58	Gamo	Kamba	Kamba Secondary	MA	Male	16 - 20 years	5	5	5	5	5	5	5	5	5	5
Gazo - 59	Gamo	Kamba	Kamba Secondary	Degree	Male	16 - 20 years	4	4	5	5	4	4	4	4	5	5
Gazo - 60	Gamo	Kamba	Kamba Secondary	Degree	Male	6 - 10 years	4	4	4	4	4	4	4	4	4	3
Gazo - 61	Gamo	Dita	Zada Secondary	Degree	Female	6 - 10 years	5	5	5	5	5	5	5	5	5	5
Gazo - 62	Gamo	Dita	Zada Secondary	Degree	Male	6 - 10 years	1	2	3	2	2	2	1	1	2	2
Gazo - 63	Gamo	Arba Minch Zuria	Zeyse Elgo Secondary	Degree	Male	over 20 years	5	5	5	5	5	4	5	5	5	5
Gazo - 64	Gamo	Arba Minch Zuria	Kola Shele	Degree	Male	16 - 20 years	4	4	4	4	5	4	5	4	4	5
Gazo - 65	Gamo	Arba Minch Zuria	Lante	MA	Male	over 20 years	5	5	5	5	5	4	5	5	4	5
Gazo - 66	Gamo	Arba Minch Zuria	Shelle Mella Secondary	Degree	Male	over 20 years	5	5	5	5	5	4	5	5	5	5
Gazo - 67	Gamo	Arba Minch Zuria	Kama Zeyse	Degree	Male	over 20 years	5	5	5	5	5	4	5	5	5	5
Gazo - 68	Gamo	Dita	Zada Secondary	Degree	Male	16 - 20 years	5	5	5	5	5	5	5	5	5	5
Gazo - 69	Gamo	Arba Minch Zuria	Chamo	Degree	Male	16 - 20 years	4	4	4	4	5	4	4	4	5	4
Gazo - 70	Gamo	Dita	Zada	Degree	Female	6 - 10 years	4	4	4	4	5	4	4	4	4	4
Gazo - 71	Gamo	Dita	Zada Secondary	Degree	Female	16 - 20 years	4	5	5	5	4	5	4	5	5	4
Gazo - 72	Gamo	Dita	Woyza	Degree	Female	6 -10 years	4	4	4	4	4	4	4	4	4	4
Gazo - 73	Gamo	Arba Minch Town	Gamo Bayra	MA	Female	over 20 years	4	5	5	4	4	4	4	5	3	4
Gazo - 74	Gamo	Dita	Zada Secondary	Degree	Male	6 - 10 years	3	4	4	4	3	4	4	4	4	4
Gazo - 75	Gamo	Dita	Dita Suluse	Degree	Male	6 - 10 years	5	4	5	5	5	5	5	5	4	5
Gazo - 77	Gamo	Chencha	Dorze	MA	Male	over 20 years	4	4	5	4	4	4	4	4	4	5
Gazo - 78	Gamo	Arba Minch Town	Arba Minch Comp.	MA	Male	over 20 years	4	4	4	4	4	4	4	4	4	4
Gazo - 79	Gamo	Arba Minch Town	Arba Minch Highschool	MA	Female	over 20 years	5	5	4	5	5	5	5	5	5	5
Gazo - 80	Gamo	Chencha	Dorze	Degree	Male	16 - 20 years	5	5	4	5	5	5	5	5	5	5
Gazo - 81	Gamo	Kamba	Kamba Secondary	Degree	Male	16 - 20 years	4	4	4	3	4	3	5	5	5	4
Gazo - 82	Gamo	Geressie Zuria	Danbile Ossa	Degree	Male	11 - 15 years	5	5	5	5	5	5	5	5	5	4
Gazo - 83	Gamo	Boreda	Gaga Gocho	Degree	Male	16 - 20 years	5	4	4	4	4	5	5	5	5	4
Gazo - 84	Gamo	Mirab Abaya	Mirab Abaya	Degree	Male	16 - 20 years	5	5	5	5	5	5	5	5	5	5
Gazo - 85	Gamo	Boreda	Kite	Degree	Male	11 - 15 years	5	5	5	5	5	5	5	5	5	5
Gazo - 86	Gamo	Gressie	Bola Zame	Degree	Female	11 -15 years	3	4	4	4	4	4	4	4	4	4
Gazo - 87	Gamo	Boreda	Gaga Gocho	Degree	Female	6 - 10 years	4	4	4	4	4	4	4	4	4	4
Gazo - 88	Gamo	Boreda	Boreda Seconday	Degree	Female	6 - 10 years	4	4	4	4	4	4	4	4	4	4
Gazo - 89	Gamo	Mirab Abaya	Umo Lante	Degree	Male	16 - 20 years	4	5	4	4	5	5	4	5	4	4
Gazo - 90	Gamo	Mirab Abaya	Umo Lante	Degree	Male	11 - 15 years	4	4	4	4	4	4	4	5	5	4
Gazo - 91	Gamo	Boreda	Boreda Seconday	MA	Male	over 20 years	5	5	5	5	4	5	5	5	5	5
Gazo - 92	Gamo	Boreda	Menusha Secondary	MA	Male	6 -10 years	4	5	5	5	5	5	5	5	5	5
Gazo - 93	Gamo	Boreda	Boreda Seconday	Degree	Male	16 - 20 years	4	4	4	4	4	4	4	5	5	5
Gazo - 94	Gamo	Boreda	Boreda Seconday	MA	Male	11 - 15 years	4	4	3	4	4	4	4	4	3	4
Gazo - 95	Gamo	Birbir Town	Mirab Abaya S/S	MA	Male	11 - 15 years	4	4	4	3	4	3	4	4	4	4
Gazo - 96	Gamo	Birbir Town	Mirab Abaya S/S	MA	Male	16 - 20 years	4	5	5	4	4	4	5	4	5	4
Gazo - 97	Gamo	Boreda	Boreda Seconday	Degree	Male	over 20 years	3	4	3	5	4	3	4	4	4	5
Gazo - 98	Gamo	Bonke	Gazeso	Degree	Female	16 - 20 years	3	3	5	3	4	4	4	5	4	4
Gazo - 99	Gamo	Garda Marta	Qogale	Degree	Female	1 - 5 years	4	4	5	5	5	4	4	5	5	5
Gazo - 100	Gamo	Chencha	Shama	Degree	Male	11 - 15 years	4	5	4	4	5	5	4	4	4	4
Gazo - 101	Gamo	Kogota	Ezzo Secondary	Degree	Female	6 - 10 years	3	4	4	4	4	3	3	3	4	4
Gazo - 102	Gamo	Bonke	Kashaso	Degree	Male	11 - 15 years	4	4	5	5	4	4	4	4	4	4
Gazo - 103	Gamo	Bonke	Gazeso	Degree	Male	11 - 15 years	4	4	5	4	4	5	4	4	4	4
Gazo - 104	Gamo	Selamber Town	Selamber	MA	Male	16 - 20 years	5	5	5	4	4	4	5	4	4	4
Gazo - 105	Gamo	Qucha	S/S/School	Degree	Male	16 - 20 years	3	4	3	3	3	3	3	4	3	3
Gazo - 106	Gamo	Selamber Town	S/S/School	Degree	Male	11 - 15 years	4	4	4	3	3	3	3	4	4	4
Gazo - 107	Gamo	Kucha	Dinke Highschool	Degree	Female	11 - 15 years	4	3	3	3	3	3	4	4	3	4
Gazo - 108	Gamo	Arba Minch Town	Arba Minch	MA	Male	11 - 15 years	4	4	4	5	5	4	5	5	5	5
Gazo - 109	Gamo	Boreda	Boreda Seconday	Degree	Male	16 - 20 years	4	3	3	4	5	4	5	4	4	3
Gazo - 110	Gamo	Arba Minch	Arba Minch S/S	Degree	Male	over 20 years	3	5	5	5	4	5	5	5	4	4
Gazo - 111	Gamo	Arba Minch	Arba Minch	Degree	Male	over 20 years	4	4	5	4	4	4	4	5	4	5
Gazo - 114	Gamo	Arba Minch Town	Arba Minch S/S	Degree	Female	16 - 20 years	4	5	5	5	4	5	5	5	5	5
Gazo - 115	Gamo	Arba Minch Town	Chamo Secondary	MA	Female	over 20 years	5	5	5	5	4	4	4	5	5	5
Gazo - 116	Gamo	Bonke	Gazeso Secondary	Degree	Male	6 - 10 years	5	5	5	5	5	5	5	5	5	5
Gazo - 119	Gamo	Arba Minch	Abaya	Degree	Male	over 20 years	5	5	5	5	5	5	5	5	5	5
Gazo - 120	Gamo	Kogota	Ezzo Secondary	MA	Male	over 20 years	5	5	5	5	5	5	5	5	5	5
Gazo - 122	Gamo	Kogota	Ezzo Secondary	Degree	Male	16 - 20 years	4	5	5	5	4	4	5	5	5	5
Gazo - 123	Gamo	Kogota	Kogota	Degree	Male	6 - 10 years	5	4	3	4	3	4	4	4	4	4
Gazo - 124	Gamo	Arba Minch	Abaya	Degree	Female	16 - 20 years	5	4	5	5	5	5	4	5	5	5
Gazo - 125	Gamo	Arba Minch	Abaya Secondary	Degree	Male	over 20 years	4	5	5	5	4	5	4	5	4	5
Gazo - 126	Gamo	Birbir Town	Mirab Abaya S/S	MA	Female	over 20 years	1	4	2	3	3	3	3	3	3	3
Gazo - 127	Gamo	Birbir Town	Birbir S/S	MA	Female	over 20 years	4	4	4	4	4	4	4	5	4	4
Gazo - 128	Gamo	Kogota	Ezzo Secondary	Degree	Male	11 - 15 years	4	4	4	4	4	5	5	5	4	4
Gazo - 129	Gamo	Bonke	Baza	Degree	Male	1 - 5 years	5	5	5	5	4	4	5	5	5	4
Gazo - 130	Gamo	Arba Minch Zuria	Chano Dorga	Degree	Male	16 - 20 years	4	4	4	4	4	4	4	4	4	4
Gazo - 131	Gamo	Arba Minch	Abaya	Degree	Male	over 20 years	5	5	5	5	5	5	5	4	4	4
Gazo - 132	Gamo	Arba Minch Town	Chamo Secondary	MA	Male	over 20 years	5	5	5	4	4	4	5	4	5	4
Gazo - 133	Gamo	Arba Minch Town	Chamo Secondary	Degree	Male	16 -20 years	4	5	5	4	4	5	5	5	5	5
Gazo - 134	Gamo	Arba Minch Town	Arba Minch S/S	Degree	Male	over 20 years	5	5	5	5	5	5	5	5	5	5
Gazo - 135	Gamo	Mirab Abaya	Mirab Abaya S/S	MA	Male	over 20 years	4	5	5	5	5	4	5	5	5	5
Gazo - 136	Gamo	Daramallo	Wacha Secondary	MA	Male	over 20 years	2	4	3	4	3	5	4	5	4	5
KO - 1	Konso	Karat	Karat	Degree	Female	over 20 years	4	4	5	5	5	4	4	4	5	4
KO - 2	Konso	Karat	Konso Highschool	Degree	Female	11 - 15 years	5	5	5	5	5	5	5	5	5	5
KO - 3	Konso	Kena	Fasha Secondary	Degree	Male	11 - 15 years	4	5	5	5	5	4	4	4	4	4
KO - 4	Konso	Kolme	Kolme	Degree	Male	6 - 10 years	4	4	4	4	4	4	4	5	4	5
KO - 5	Konso	Karat Town	Konso Secondary	Degree	Male	11 - 15 years	4	5	5	4	5	4	5	5	5	5
KO -6	Konso	Karat	Konso Secondary	Degree	Male	1 - 5 years	4	4	5	5	5	5	5	5	5	5
KO - 7	Konso	Karat Town	K/S/P/S	MA	Female	11 - 15 years	5	5	5	5	4	4	5	4	4	5
KO - 8	Konso	Kena	Fasha Secondary	Degree	Male	16 - 20 years	4	5	5	4	4	5	5	4	5	4
KO - 9	Konso	Karat Town	Konso Highschool	Degree	Male	over 20 years	3	4	4	4	4	4	4	3	5	3
KO - 10	Konso	Kena	Fasha Highschool	Degree	Male	11 - 15 years	5	5	5	5	5	5	5	5	5	5
KO - 11	Konso	Karat Zuria	Arsayide	Degree	Male	1 - 5 years	5	5	5	5	5	5	5	5	5	5
KO - 12	Konso	Karat Town	K/S/P/S	MA	Male	over 20 years	5	5	5	5	5	5	5	5	5	5
KO -13	Konso	Kena	Doha Secondary	Degree	Male	11 - 15 years	5	5	5	5	5	5	5	5	5	5
KO - 14	Konso	Kena	Doha Secondary	Degree	Male	over 20 years	5	5	5	5	5	5	5	5	5	5
KO - 15	Konso	Kena	Fasha Secondary	Degree	Male	over 20 years	3	3	4	3	3	4	3	3	3	3
KO - 16	Konso	Segen Zuria	Hailato Dokatu	Degree	Male	over 20 years	5	4	5	5	5	5	4	5	4	5
KO - 18	Konso	Kena	Fasha Secondary	Degree	Male	11 - 15 years	5	5	4	5	4	5	4	5	4	5
Kore - 1	Koore		Dohonso	Degree	Female	over 20 years	4	4	5	4	4	4	4	4	5	4
Kore - 2	Koore		Kelle	Degree	Female	11 - 15 years	4	4	4	4	5	4	5	3	4	5
Kore - 3	Koore	Gorka	M/K/Dano	Degree	Male	6 - 10 years	5	5	5	5	5	5	5	5	5	5
Kore - 4	Koore	Kelle Town	Kelle Secondary	Degree	Male	over 20 years	1	1	1	1	1	1	1	1	1	1
Kore - 5	Koore	Gorka	Jojola M/S/S	Degree	Male	over 20 years	5	5	5	4	4	4	5	5	4	4
Kore - 6	Koore	Kelle Town	Kelle Secondary	MA	Male	16 - 20 years	5	5	5	5	5	4	5		4	5
Kore - 7	Koore	Gorka	Jojola M/S/S	Degree	Male	over 20 years	4	4	4	5	4	3	4	4	4	4
Kore - 8	Koore	Kelle Town	Kelle Secondary	Degree	Male	over 20 years	4	3	4	4	4	3	4	4	3	4
Kore - 9	Koore		Dhanso	MA	Male	11 - 15 years	2	2	3	2	4	2	2	2	2	2
Kore - 10	Koore	Amaro	Dhonse	MA	Male	over 20 years	2	3	3	2	2	2	2	2	2	2
Kore - 11	Koore	Kelle Town	Dhonso	Degree	Male	over 20 years	4	5	5	5	4	4	4	4	4	4
Kore - 12	Koore	Kelle Town	Kelle Secondary	MA	Male	16 -20 years	4	4	1	5	5	4	4	4	4	4
Kore - 13	Koore	Gorka	Etate	Degree	Male	over 20 years	3	4	5	5	5	5	4	5	5	4
Kore - 14	Koore	Kelle Town	Dhonso	MA	Male	16 - 20 years	3	3	3	3	3	3	3	3	3	3
Kore - 15	Koore	Gorka	Jijola	Degree	Male	over 20 years	4	4	5	4	4	4	4	4	4	4
Kore - 16	Koore	Gorka	Dano	Degree	Male	11 - 15 years	3	4	4	3	3	3	4	4	4	4
Kore - 17	Koore	Gorka	Jijola	Degree	Female	6 - 10 years	5	5	4	4	4	5	4	4	5	5
Kore - 18	Koore	Kelle Town	Kelle Secondary	Degree	Male	6 - 10 years	4	4	5	4	5	4	5	4	4	4
Kore - 19	Koore	Gorka	Jijola	Degree	Male	6 - 10 years	4	4	4	5	5	5	5	5	5	5
Kore - 20	Koore	Kelle	Dhonso	MA	Male	6 - 10 years	4	4	5	4	4	4	4	5	4	4
Kore - 21	Koore	Gorka	Mesay Kasa Dano S/S	Degree	Male	6 - 12 years	4	4	5	4	4	4	5	4	4	5
Aari - 1	Aari	South Aari	Berka	Degree	Male	1 - 5 years	3	4	4	3	3	4	3	3	4	4
Aari - 2	Aari			Degree	Male	over 20 years	3	1	3	2	1	4	2	4	2	4
Aari - 3	Aari	Jinka	Meles Zenawi Memorial S/S	MA	Male	16 - 20 years	5	5	5	5	5	5	5	5	5	5
Aari - 4	Aari	Jinka Town Administration	Jinka Secondary School	Degree	Female	16 - 20 years	4	4	4	5	4	5	5	5	5	5
Aari - 6	Aari	Jinka Town Administration	Meles Zenawi Memorial S/S	MA	Male	over 20 years	5	5	5	5	4	5	5	5	4	5
Aari - 7	Aari	Semen Aari	Melorasha Secondary	Degree	Male	11 - 15 years	5	5	4	5	5	5	5	4	4	5
Aari - 8	Aari	Semen Aari	Gelila	Degree	Male	6 - 10 years	4	4	5	5	4	5	4	5	5	5
Aari - 9	Aari	Semen Aari	Gelila	MA	Male	6 - 10 years	4	4	4	4	4	5	5	5	5	5
Aari - 10	Aari	Jinka	Jinka High School	MA	Female	over 20 years	4	5	5	5	5	4	4	5	5	5
Aari - 11	Aari	Jinka	Meles Zenawi Memorial S/S	MA	Male	over 20 years	5	5	5	4	5	4	5	4	5	5
Aari - 12	Aari	South Aari	Goh	Degree	Male	16 - 20 years	5	5	5	5	5	5	5	5	5	4
Aari - 13	Aari	Jinka	Jinka M/S/S	MA	Male	11 - 15 years	4	5	5	5	5	5	4	5	4	4
Aari - 14	Aari	Jinka	Jinka	Degree	Male	over 20 years	3	3	3	4	3	3	3	3	3	3
Aari - 16	Aari	South Aari	Gorker	MA	Male	over 20 years	4	5	4	5	5	5	5	5	4	5
Aari - 17	Aari	Jinka		Degree	Male	11 - 15 years	4	4	4	4	4	5	4	5	4	4
Aari - 18	Aari	South Aari	Gorker	Degree	Female	11 - 15 years	5	5	5	5	4	5	5	5	5	5
Aari - 19	Aari	Jinka	Jinka M/S/S	Degree	Female	11 - 15 years	5	5	5	5	4	5	5	5	5	4
Aari - 20	Aari	Jinka	Jinka Secondary School	Degree	Male	over 20 years	5	4	5	5	5	4	5	5	4	4
Aari - 21	Aari	Jinka	Jinka Secondary School	Degree	Male	over 20 years	4	4	4	4	4	4	4	4	4	3
Aari - 21	Aari	South Aari	Goh	Degree	Male	2024-11-15	4	4	4	4	4	4	4	4	4	4
Aari - 23	Aari	Jinka	Jinka High School	Degree	Female	over 20 years	4	5	5	5	4	5	5	5	4	5
Aari -26	Aari	Baka-Dawla	Yetnebersh	Degree	Male	16 - 20 years	2	2	2	3	4	3	4	4	4	4
Aari - 27	Aari	Jinka	Jinka M/S/S	MA	Female	over 20 years	4	5	5	5	4	4	4	4	3	4
Gard - 1	Gardula	Derashe	Bussa Killa Secondary School	Degree	Female	1 - 5 years	4	4	4	4	4	5	4	3	3	4
Gard - 2	Gardula	Derashe	Gidole Secondary	MA	Male	16 - 20 Years	5	4	5	4	4	4	4	4	4	4
Gard - 3	Gardula	Derashe	Holte	Degree	Male	16 - 20 years	5	5	5	5	5	5	5	5	5	5
Gard - 4	Gardula	Derashe	Arguba	Degree	Male	1 - 5 years	4	5	5	4	4	5	3	5	4	4
Gard - 5	Gardula	Derashe	G/S/S/S	Degree	Female	over 20 years	5	5	5	5	5	5	5	5	5	5
Gard - 6	Gardula	Derashe	G/S/S/S	Degree	Female	over 20 years	4	5	5	5	5	5	5	5	5	5
Gard - 7	Gardula	Derashe	Gidole Secondary	MA	Male	over 20 years	5	5	5	5	5	5	4	5	5	4
Gard - 8	Gardula	Derashe	Gidole Prison Highschool	Degree	Male	over 20 years	5	5	5	5	5	5	5	5	5	5
Gard - 9	Gardula	Derashe	G/S/S/S	Degree	Male	over 20 years	4	5	4	4	4	5	4	5	5	4
Gard - 10	Gardula	Derashe	Gidole Prison Highschool	Degree	Male	1 - 5 years	4	4	5	4	3	4	4	5	4	4
Gard - 11	Gardula	Derashe	Gato	Degree	Male	1 - 5 years	3	4	4	4	5	5	5	5	5	5
Gard - 12	Gardula	Derashe	Shilale	Degree	Male	1 - 5 years	4	4	4	4	4	4	4	4	4	4
Gard - 13	Gardula	Derashe	Holte	Degree	Male	16 - 20 years	4	4	4	4	4	4	4	4	4	4
Gard - 14	Gardula	Derashe	Haybena	Degree	Male	over 20 years	5	5	5	4	4	5	4	5	5	5

## Sheet: Grammar and Vocabulary
Code	Zone	Woreda	School Name	Educational Level	Sex	Teaching Experience	The Special Capacity Building Training Program helped me to conceptualize the characteristic nature of a grammar lesson	The Special Capacity Building Training Program helped me to identify the key concepts and approaches to teaching grammar	The Special Capacity Building Training Program helped me to solve the challenges of teaching grammar	The Special Capacity Building Training Program helped me to experience how a grammar lesson is presented	The Special Capacity Building Training Program helped me to conceptualize the practical presentation of grammar lesson	The Special Capacity Building Training Program helped me to prepare grammar lesson plans based on the new curriculum	The Special Capacity Building Training Program helped me to comment on the appropriateness of a grammar lesson	The Special Capacity Building Training Program helped me to conceptualize the role of vocabulary in language learning	The Special Capacity Building Training Program helped me to share my experiences about vocabulary learning and teaching processes	The Special Capacity Building Training Program helped me to identify the main strategies of teaching vocabulary	The Special Capacity Building Training Program helped me to conceptualize the practical presentation of a vocabulary lesson	The Special Capacity Building Training Program helped me to implement the vocabulary lesson	The Special Capacity Building Training Program helped me to comment on the appropriateness of activities in a vocabulary lesson
BU-1	Burji	Soyama	S/S/S/S	Degree	Male	11-15 years	4	3	4	5	5	4	4	1	3	3	3	4	3
BU-2	Burji	Soyama	Shule	Degree	Male	6 -10 years	5	5	4	5	5	5	5	5	5	5	5	4	4
BU -3	Burji			MA	Male	16 -20 years	5	4	5	4	4	5	4	5	5	4	4	5	4
BU -4	Burji			Degree	Male	16-20 years
BU -5	Burji	Soyama	Akeye	Degree	Male	over 20 years	4	4	3	4	4	3	4	4	4	4	3	4	4
BU-6	Burji	Soyama	Soyama	Degree	Male	11 -15 years	4	4	3	3	4	4	3	4	3	3	3	4	3
BU -7	Burji	Soyama Town Administration	Soyama Secondary School	Degree	Male	over 20 years	4	4	4	4	4	4	4	4	4	4	4	3	3
BU -8	Burji	S/Zuria	Chuluse	Degree	Male	11 -15 years	4	4	4	4	4	4	4	4	4	4	4	4	4
BU -9	Burji	S/Zuria	Shule	Degree	Male	6 -10 years	5	5	5	4	4	5	5	5	5	5	4	4	4
BU -10	Burji	Soyama	Akia Secondary	Degree	Male	over 20 years	4	4	3	4	4	4	4	4	5	5	4	4	3
SO -1	South Omo	Hamer	D/M/S/S	Degree	Male	16 -20 years	4	4	2	2	4	4	5	4	5	4	4	4	3
SO -2	South Omo	Maale	Chaliti Secondary	Degree	Male	6 - 10 years	5	5	4	4	5	5	5	5	5	5	5	5	4
SO -3	South Omo	Aari	Jinka High School	Degree	Male	over 20 years	5	5	4	5	4	4	4	4	4	5	4	4	4
SO -4	South Omo	Maale	Koibe	Degree	Male	11 -15 years	4	4	2	4	4	5	5	4	5	5	4	4	4
SO -5	South Omo	Dassanech	Omo Tefasess	Degree	Female	6 - 10 years	5	5	4	4	5	5	4	5	4	4	5	4	4
SO -6	South Omo	Benna Tsemay	Kaho	Degree	Male	over 20 years	4	3	3	3	3	4	3	4	4	4	4	4	4
SO -7	South Omo	Benna Tsemay	Kako	Degree	Male	11 -15 years	4	3	3	3	3	4	3	4	4	4	4	3	2
SO -8	South Omo	Salamago	Gero	Degree	Male	1 - 5 years	4	5	3	4	5	5	4	4	5	5	5	4	4
SO - 9	South Omo	Hamer	Dimeka	Degree	Female	1 - 5 years	4	4	3	4	4	4	4	3	4	4	3	4	4
Gazo -1	Gamo	Birbir Town	M/A/S/S	MA	Male	over 20 years	4	5	5	5	5	5	4	4	5	5	5	4	4
Gazo -2	Gamo	Boreda	Chilashe	Degree	Male	11 - 15 years	5	5	5	5	5	5	5	5	5	5	5	5	5
Gazo -3	Gamo	Boreda	Boreda Seconday	MA	Male	11 -15 years	4	5	4	5	4	5	5	5	4	5	5	5	5
Gazo -4	Gamo	Boreda	Boreda Seconday	Degree	Male	16 -20 years	4	5	4	4	4	4	4	4	4	4	4	4	4
Gazo -5	Gamo	Birbir Town	M/A/S/S	Degree	Male	over 20 years	4	5	4	4	4	4	4	4	4	4	4	4	4
Gazo -6	Gamo	Birbir Town	M/A/S/S	Degree	Male	over 20 years	4	5	4	5	5	5	4	5	5	5	5	5	5
Gazo -7	Gamo	Boreda	Boreda Seconday	MA	Male	16 -20 years	4	4	5	5	4	4	5	4	5	4	4	4	5
Gazo -8	Gamo	Boreda	Gaga Gocho	Degree	Male	16 -20 years	4	4	1	1	4	1	1	1	1	1	1	1	1
Gazo -9	Gamo	Boreda	Boreda Seconday	MA	Female	6 -10 years	4	4	3	4	4	4	3	5	4	4	4	3	4
Gazo -10	Gamo	Mirab Abaya	M/A/S/S	Degree	Female	over 20 years	4	4	4	4	4	4	4	4	4	4	4	4	4
Gazo -11	Gamo	Birbir Town	M/A/S/S	Degree	Male	16 -20 years	4	4	4	4	4	4	4	4	4	4	4	5	5
Gazo -12	Gamo	Boreda	Gaga Gocho	Degree	Male	11 -15 years	4	4	5	5	4	1	3	3	4	4	4	3	4
Gazo - 13	Gamo	Boreda	Boreda Seconday	Degree	Male	16 -20 years	5	5	5	5	5	5	5	5	5	5	5	5	5
Gazo - 14	Gamo	Boreda	Boreda Seconday	Degree	Male	over 20 years	4	4	3	4	3	3	3	5	4	4	4	3	4
Gazo - 15	Gamo	Boreda	Chilashe Secondary School	Degree	Male	6 - 10 years	4	4	4	4	4	5	5	4	5	4	5	4	5
Gazo - 16	Gamo	Geressie	Bola Zame	Degree	Female	1 -5 years	4	5	5	4	5	5	4	5	4	4	3	3	5
Gazo - 17	Gamo	Mirab Abaya	Ankober	MA	Male	16 -20 years	3	5	4	4	5	5	4	3	4	4	4	5	4
Gazo - 18	Gamo	Geressie	Durbe	Degree	Male	6 - 10 years	5	5	5	5	5	5	5	5	5	5	5	5	5
Gazo - 19	Gamo	Geressie Zuria	Danbile Otora Secondary	Degree	Male	11 - 15 years	4	4	4	4	5	5	4	4	4	5	5	5	4
Gazo - 20	Gamo	Mirab Abaya	Umo Lante	Degree	Male	6 - 10 years	4	5	2	2	4	5	5	4	4	4	4	4	4
Gazo - 21	Gamo	Boreda	Menkura	Degree	Male	16 - 20 years	5	5	5	5	5	5	5	5	5	5	5	5	5
Gazo - 22	Gamo	Boreda	Zefine Hidasse S.S.	Degree	Male	1 - 5 years	5	5	5	5	5	5	5	5	5	5	5	5	5
Gazo - 23	Gamo	Gressie Zuria	Danbile Otora Secondary	Degree	Male	6 - 10 years	5	5	5	5	5	5	4	4	4	4	4	4	4
Gazo - 24	Gamo	Geressie Zuria	Garbansa Ayche Secondary School	Degree	Male	11 -15 years	5	5	5	5	5	5	5	5	5	5	5	5	5
Gazo - 25	Gamo	Gressie	G/Ayche	Degree	Male	6 - 10 years	3	4	4	4	5	4	5	4	4	4	5	5	4
Gazo - 26	Gamo	Geressie	Bola Zame	Degree	Male	over 20 years	4	4	4	4	4	4	4	4	4	4	4	4	4
Gazo - 28	Gamo	Arba Minch	Arba Minch S/S	MA	Male	over 20 years	4	4	1	4	4	4	5	4	4	4	4	4	4
Gazo - 29	Gamo	Arba Minch	Arba Minch Limat S/S		Female	11 -15 years	4	5	5	5	5	5	5	5	5	5	4	4	4
Gazo - 30	Gamo	Daramallo	Wacha Secondary	Degree	Male	over 20 years	5	5	5	5	5	5	5	5	5	5	5	5	5
Gazo - 31	Gamo	Arba Minch	Arba Minch Prison	Degree	Female	16 - 20 years	5	5	5	5	5	5	5	5	5	5	5	5	5
Gazo - 32	Gamo	Gacho Baba	Zigiti Merche	Degree	Male	11 - 15 years	5	5	5	5	5	5	5	5	5	5	5	5	5
Gazo - 33	Gamo	Arba Minch		Degree	Female	16 - 20 years	5	5	5	5	5	5	5	5	5	5	5	5	5
Gazo - 34	Gamo	Arba Minch		MA	Female	1 - 5 years	5	5	1	4	5	5	5	5	5	5	5	5	5
Gazo - 35	Gamo	Mirab Abaya	Mirab	Degree	Male	over 20 years	5	4	4	5	4	5	5	5	4	4	4	5	5
Gazo -36	Gamo	Gacho Baba	Gatse	Degree	Female	1 - 5 years	3	4	3	4	3	4	4	3	3	4	1	1	4
Gazo - 37	Gamo	Geressie	Geressie High School	Degree	Male	11 - 15 years	4	5	4	5	5	5	5	5	5	5	5	5	5
Gazo - 38	Gamo	Gacho Baba	Z/Bakole	Degree	Male	16 - 20 years	4	5	4	5	4	4	4	4	4	5	4	4	4
Gazo - 39	Gamo	Mirab Abaya	Wajifo	Degree	Male	1 - 5 years	2	4	2	4	4	4	4	4	4	2	2	2	2
Gazo - 40	Gamo	Geressie	Medium School	Degree	Male	11 - 15 years	1	5	2	3	2	4	5	5	5	4	4	4	4
Gazo - 41	Gamo	Arba Minch Zuria	Sile Sira Primary	Degree	Female	16 - 20 years	1	2	3	2	2	2	2	2	2	4	4	2	2
Gazo - 42	Gamo	Gacho Baba	Zigiti Bakole	MA	Male	16 - 20 years	4	4	5	5	5	5	5	5	4	5	5	5	5
Gazo - 43	Gamo	Geressie	Geressie S.S.	Degree	Female	16 - 20 years	5	5	4	4	4	4	4	4	4	4	4	4	4
Gazo - 44	Gamo	Kamba	Kamba	Degree	Male	16 - 20 years	5	5	4	4	5	5	5	4	5	4	4	5	4
Gazo - 46	Gamo	Arba Minch Zuria	Kola Shele	Degree	Male	11 - 15 years	3	4	2	4	2	2	4	4	3	4	3	2	4
Gazo - 47	Gamo	Arba Minch Zuria	Lante Primary	Degree	Female	6 - 10 years	4	4	3	4	4	4	4	3	4	4	4	4	4
Gazo - 48	Gamo	Mirab Abaya	Umo Lante	Degree	Female	6 - 10 years	4	4	3	4	4	3	4	2	2	4	2	4	2
Gazo - 49	Gamo	Boreda	Chillashe Allo	Degree	Female	11 - 15 years	5	4	5	4	5	5	4	4	4	5	4	4	4
Gazo - 50	Gamo	Mirab Abaya	Mirab Abaya	Degree	Male	11 - 15 years	5	5	5	5	5	5	5	5	5	5	5	5	5
Gazo - 51	Gamo	Dita	Zada	Degree	Female	16 - 20 years	3	4	3	4	3	3	4	4	4	4	4	4	3
Gazo - 52	Gamo	Kamba	Kamba Secondary	Degree	Male	over 20 years	5	5	5	5	5	5	5	5	5	5	5	5	5
Gazo - 53	Gamo	Chencha	Chencha S/S	MA	Male	16 - 20 years	5	5	3	5	5	4	2	5	4	4	4	5	5
Gazo - 54	Gamo	Gressie	Geressie High School	Degree	Male	16 - 20 years	1	1	2	1	1	2	2	2	2	2	2	2	2
Gazo - 55	Gamo	Chencha	Chencha S/S	Degree	Male	1 - 5 years
Gazo - 56	Gamo	Gacho Baba	Wusamo	Degree	Male	1 - 5 years	5	5	5	5	5	5	5	5	5	5	5	5	5
Gazo - 57	Gamo	Kamba	Kamba Secondary	Degree	Female	16 - 20 years	5	5	5	5	5	5	5	5	5	5	5	5	5
Gazo - 58	Gamo	Kamba	Kamba Secondary	MA	Male	16 - 20 years	5	5	5	5	5	5	5	5	5	5	5	5	5
Gazo - 59	Gamo	Kamba	Kamba Secondary	Degree	Male	16 - 20 years	4	4	4	4	4	5	4	4	5	5	5	5	4
Gazo - 60	Gamo	Kamba	Kamba Secondary	Degree	Male	6 - 10 years	4	3	3	4	4	4	4	4	3	4	4	3	3
Gazo - 61	Gamo	Dita	Zada Secondary	Degree	Female	6 - 10 years	5	5	5	5	5	5	5	5	5	5	5	5	5
Gazo - 62	Gamo	Dita	Zada Secondary	Degree	Male	6 - 10 years	4	4	4	2	2	5	5	1	1	2	2	2	3
Gazo - 63	Gamo	Arba Minch Zuria	Zeyse Elgo Secondary	Degree	Male	over 20 years	5	5	5	5	5	5	5	5	4	5	5	5	5
Gazo - 64	Gamo	Arba Minch Zuria	Kola Shele	Degree	Male	16 - 20 years	4	4	4	5	4	4	5	5	4	4	4	4	4
Gazo - 65	Gamo	Arba Minch Zuria	Lante	MA	Male	over 20 years	5	5	4	5	5	5	5	5	4	4	4	4	5
Gazo - 66	Gamo	Arba Minch Zuria	Shelle Mella Secondary	Degree	Male	over 20 years	5	5	5	5	5	5	5	4	5	5	5	5	5
Gazo - 67	Gamo	Arba Minch Zuria	Kama Zeyse	Degree	Male	over 20 years	5	5	5	5	5	5	5	5	5	5	5	5	5
Gazo - 68	Gamo	Dita	Zada Secondary	Degree	Male	16 - 20 years	5	5	5	5	5	5	5	5	5	5	5	5	5
Gazo - 69	Gamo	Arba Minch Zuria	Chamo	Degree	Male	16 - 20 years	Agree	4	4	4	4	4	4	5	5	4	4	4	4
Gazo - 70	Gamo	Dita	Zada	Degree	Female	6 - 10 years	Agree	4	4	4	4	4	4	4	5	4	4	4	4
Gazo - 71	Gamo	Dita	Zada Secondary	Degree	Female	16 - 20 years	Agree	5	4	5	5	5	4	5	5	5	4	4	4
Gazo - 72	Gamo	Dita	Woyza	Degree	Female	6 -10 years	Agree	4	4	4	4	4	4	5	5	4	4	5	4
Gazo - 73	Gamo	Arba Minch Town	Gamo Bayra	MA	Female	over 20 years	Agree	4	3	4	4	4	4	4	4	4	4	4	4
Gazo - 74	Gamo	Dita	Zada Secondary	Degree	Male	6 - 10 years	Agree	5	3	5	4	5	5	4	5	5	4	5	3
Gazo - 75	Gamo	Dita	Dita Suluse	Degree	Male	6 - 10 years	Agree	4	5	5	5	4	5	5	5	5	4	4	4
Gazo - 77	Gamo	Chencha	Dorze	MA	Male	over 20 years	Agree	4	4	4	4	4	4	4	4	4	4	4	4
Gazo - 78	Gamo	Arba Minch Town	Arba Minch Comp.	MA	Male	over 20 years	Strongly Agree	5	5	5	5	5	5	5	5	5	5	5	5
Gazo - 79	Gamo	Arba Minch Town	Arba Minch Highschool	MA	Female	over 20 years	Agree	4	5	5	5	5	5	4	4	5	4	5	4
Gazo - 80	Gamo	Chencha	Dorze	Degree	Male	16 - 20 years	Agree	4	3	3	4	4	4	3	5	5	5	4	3
Gazo - 81	Gamo	Kamba	Kamba Secondary	Degree	Male	16 - 20 years	Strongly Agree	5	5	5	5	5	5	5	4	5	5	5	5
Gazo - 82	Gamo	Geressie Zuria	Danbile Ossa	Degree	Male	11 - 15 years	Agree	4	4	4	4	5	4	4	4	4	3	3	3
Gazo - 83	Gamo	Boreda	Gaga Gocho	Degree	Male	16 - 20 years	Strongly Agree	5	5	5	5	5	5	4	5	5	5	5	5
Gazo - 84	Gamo	Mirab Abaya	Mirab Abaya	Degree	Male	16 - 20 years	Strongly Agree	5	5	5	5	5	5	5	5	5	5	5	5
Gazo - 85	Gamo	Boreda	Kite	Degree	Male	11 - 15 years	Strongly Agree	5	5	5	5	5	5	5	5	5	5	5	5
Gazo - 86	Gamo	Gressie	Bola Zame	Degree	Female	11 -15 years	Agree	4	4	4	4	4	4	4	4	4	4	4	4
Gazo - 87	Gamo	Boreda	Gaga Gocho	Degree	Female	6 - 10 years	Agree	4	4	4	4	4	4	4	4	4	4	4	4
Gazo - 88	Gamo	Boreda	Boreda Seconday	Degree	Female	6 - 10 years	Agree	4	4	4	4	4	4	4	4	4	4	4	4
Gazo - 89	Gamo	Mirab Abaya	Umo Lante	Degree	Male	16 - 20 years	Agree	4	4	5	4	5	5	4	4	4	4	4	4
Gazo - 90	Gamo	Mirab Abaya	Umo Lante	Degree	Male	11 - 15 years	Strongly Agree	5	4	4	4	5	4	4	4	4	4	4	4
Gazo - 91	Gamo	Boreda	Boreda Seconday	MA	Male	over 20 years	Strongly Agree	5	4	5	5	5	5	5	4	5	5	5	5
Gazo - 92	Gamo	Boreda	Menusha Secondary	MA	Male	6 -10 years	Strongly Agree	5	5	5	5	4	4	5	5	4	5	5	5
Gazo - 93	Gamo	Boreda	Boreda Seconday	Degree	Male	16 - 20 years	Strongly Agree	5	5	5	5	5	5	5	5	5	5	5	5
Gazo - 94	Gamo	Boreda	Boreda Seconday	MA	Male	11 - 15 years	Agree	4	4	4	4	4	4	4	4	4	4	4	4
Gazo - 95	Gamo	Birbir Town	Mirab Abaya S/S	MA	Male	11 - 15 years	Agree	4	3	3	4	4	4	4	4	4	4	4	4
Gazo - 96	Gamo	Birbir Town	Mirab Abaya S/S	MA	Male	16 - 20 years	Undecided	4	3	4	4	5	4	4	4	4	4	5	3
Gazo - 97	Gamo	Boreda	Boreda Seconday	Degree	Male	over 20 years	Agree	4	4	4	5	4	5	5	5	4	4	4	4
Gazo - 98	Gamo	Bonke	Gazeso	Degree	Female	16 - 20 years	4	3	3	4	4	3	3	4	4	3	4	4	4
Gazo - 99	Gamo	Garda Marta	Qogale	Degree	Female	1 - 5 years	4	4	5	4	4	5	5	4	4	4	4	4	4
Gazo - 100	Gamo	Chencha	Shama	Degree	Male	11 - 15 years	4	5	5	4	5	5	5	5	5	5	4	5	1
Gazo - 101	Gamo	Kogota	Ezzo Secondary	Degree	Female	6 - 10 years	4	4	3	3	3	3	4	4	4	4	4	4	4
Gazo - 102	Gamo	Bonke	Kashaso	Degree	Male	11 - 15 years	4	4	4	4	4	4	4	4	4	4	4	4	4
Gazo - 103	Gamo	Bonke	Gazeso	Degree	Male	11 - 15 years	4	4	4	4	4	5	5	4	4	4	3	3	4
Gazo - 104	Gamo	Selamber Town	Selamber	MA	Male	16 - 20 years	4	5	4	4	5	5	5	4	4	4	4	2	2
Gazo - 105	Gamo	Qucha	S/S/School	Degree	Male	16 - 20 years	4	3	4	3	3	3	3	3	3	3	3	4	4
Gazo - 106	Gamo	Selamber Town	S/S/School	Degree	Male	11 - 15 years	4	5	4	5	4	5	4	5	4	5	4	4	4
Gazo - 107	Gamo	Kucha	Dinke Highschool	Degree	Female	11 - 15 years	4	3	3	4	3	3	3	3	4	3	4	3	4
Gazo - 108	Gamo	Arba Minch Town	Arba Minch	MA	Male	11 - 15 years	5	5	5	5	5	5	5	4	4	4	4	4	4
Gazo - 109	Gamo	Boreda	Boreda Seconday	Degree	Male	16 - 20 years	4	4	5	3	4	5	4	4	4	4	4	5	4
Gazo - 110	Gamo	Arba Minch	Arba Minch S/S	Degree	Male	over 20 years	4	5	5	4	5	5	5	4	5	5	5	4	4
Gazo - 111	Gamo	Arba Minch	Arba Minch	Degree	Male	over 20 years	5	5	3	4	4	5	4	4	4	5	4	5	4
Gazo - 114	Gamo	Arba Minch Town	Arba Minch S/S	Degree	Female	16 - 20 years	5	5	4	5	4	5	5	5	5	4	4	4	5
Gazo - 115	Gamo	Arba Minch Town	Chamo Secondary	MA	Female	over 20 years	5	5	5	5	5	5	4	4	5	5	5	5	5
Gazo - 116	Gamo	Bonke	Gazeso Secondary	Degree	Male	6 - 10 years	5	5	5	5	5	5	5	5	5	5	5	5	5
Gazo - 119	Gamo	Arba Minch	Abaya	Degree	Male	over 20 years	4	4	5	5	5	5	4	4	4	4	4	5	5
Gazo - 120	Gamo	Kogota	Ezzo Secondary	MA	Male	over 20 years	5	5	4	5	4	5	5	5	5	5	4	5	5
Gazo - 122	Gamo	Kogota	Ezzo Secondary	Degree	Male	16 - 20 years	4	5	4	5	5	5	5	5	5	4	4	5	5
Gazo - 123	Gamo	Kogota	Kogota	Degree	Male	6 - 10 years	5	5	4	4	4	5	5	4	4	4	4	5	4
Gazo - 124	Gamo	Arba Minch	Abaya	Degree	Female	16 - 20 years	5	5	5	5	5	5	5	5	5	5	5	5	5
Gazo - 125	Gamo	Arba Minch	Abaya Secondary	Degree	Male	over 20 years	4	4	4	4	4	5	4	4	4	4	4	5	4
Gazo - 126	Gamo	Birbir Town	Mirab Abaya S/S	MA	Female	over 20 years	1	3	3	3	2	2	2	3	3	3	3	3	3
Gazo - 127	Gamo	Birbir Town	Birbir S/S	MA	Female	over 20 years	4	5	4	5	5	4	4	4	4	4	4	4	4
Gazo - 128	Gamo	Kogota	Ezzo Secondary	Degree	Male	11 - 15 years	4	4	4	4	4	4	4	4	4	4	4	4	4
Gazo - 129	Gamo	Bonke	Baza	Degree	Male	1 - 5 years	5	5	5	5	5	5	4	5	5	5	5	4	5
Gazo - 130	Gamo	Arba Minch Zuria	Chano Dorga	Degree	Male	16 - 20 years	4	4	4	3	4	4	4	4	3	4	4	5	5
Gazo - 131	Gamo	Arba Minch	Abaya	Degree	Male	over 20 years	5	5	5	5	5	4	5	5	5	3	5	4	5
Gazo - 132	Gamo	Arba Minch Town	Chamo Secondary	MA	Male	over 20 years	5	5	4	5	5	5	5	5	5	5	5	5	5
Gazo - 133	Gamo	Arba Minch Town	Chamo Secondary	Degree	Male	16 -20 years	4	5	4	5	4	5	4	5	4	5	5	4	4
Gazo - 134	Gamo	Arba Minch Town	Arba Minch S/S	Degree	Male	over 20 years	5	5	5	5	5	5	5	5	5	5	5	5	5
Gazo - 135	Gamo	Mirab Abaya	Mirab Abaya S/S	MA	Male	over 20 years	4	4	4	4	4	4	4	4	4	4	4	4	4
Gazo - 136	Gamo	Daramallo	Wacha Secondary	MA	Male	over 20 years	3	4	3	4	4	5	4	4	4	4	3	4	3
KO - 1	Konso	Karat	Karat	Degree	Female	over 20 years	5	4	5	4	5	5	4	5	5	5	5	5	5
KO - 2	Konso	Karat	Konso Highschool	Degree	Female	11 - 15 years	5	5	5	5	5	5	5	5	54	5	5	5	5
KO - 3	Konso	Kena	Fasha Secondary	Degree	Male	11 - 15 years	4	4	4	4	4	4	4	4	5	4	4	4	4
KO - 4	Konso	Kolme	Kolme	Degree	Male	6 - 10 years	4	4	5	5	5	5	4	4	4	4	4	4	4
KO - 5	Konso	Karat Town	Konso Secondary	Degree	Male	11 - 15 years	5	5	4	5	5	5	4	5	4	5	4	4	5
KO -6	Konso	Karat	Konso Secondary	Degree	Male	1 - 5 years	5	5	5	5	5	5	5	5	4	5	4	4	4
KO - 7	Konso	Karat Town	K/S/P/S	MA	Female	11 - 15 years	5	4	4	4	4	5	5	5	5	4	4	4	4
KO - 8	Konso	Kena	Fasha Secondary	Degree	Male	16 - 20 years	4	4	4	4	4	5	5	5	5	4	4	4	4
KO - 9	Konso	Karat Town	Konso Highschool	Degree	Male	over 20 years	3	4	4	4	4	4	4	4	4	4	4	4	4
KO - 10	Konso	Kena	Fasha Highschool	Degree	Male	11 - 15 years	5	5	4	5	5	5	5	5	5	5	5	5	5
KO - 11	Konso	Karat Zuria	Arsayide	Degree	Male	1 - 5 years	5	5	5	5	5	5	5	5	5	5	5	5	5
KO - 12	Konso	Karat Town	K/S/P/S	MA	Male	over 20 years	5	5	5	5	5	5	5	5	5	5	5	5	5
KO -13	Konso	Kena	Doha Secondary	Degree	Male	11 - 15 years	5	5	5	5	5	5	5	5	5	5	5	5	5
KO - 14	Konso	Kena	Doha Secondary	Degree	Male	over 20 years	5	5	5	5	5	5	5	5	5	5	5	5	5
KO - 15	Konso	Kena	Fasha Secondary	Degree	Male	over 20 years	4	3	3	3	3	3	3	3	3	3	3	3	3
KO - 16	Konso	Segen Zuria	Hailato Dokatu	Degree	Male	over 20 years	5	5	4	5	5	4	5	4	5	5	5	5	4
KO - 18	Konso	Kena	Fasha Secondary	Degree	Male	11 - 15 years	4	5	4	4	4	4	5	4	5	4	4	4	4
Kore - 1	Koore		Dohonso	Degree	Female	over 20 years	5	4	4	5	5	4	4	4	5	5	4	4	4
Kore - 2	Koore		Kelle	Degree	Female	11 - 15 years	4	5	4	4	5	4	5	4	5	4	4	4	5
Kore - 3	Koore	Gorka	M/K/Dano	Degree	Male	6 - 10 years	5	5	5	5	5	5	5	5	5	5	5	5	5
Kore - 4	Koore	Kelle Town	Kelle Secondary	Degree	Male	over 20 years	1	1	1	1	1	1	1	1	4	1	1	1	1
Kore - 5	Koore	Gorka	Jojola M/S/S	Degree	Male	over 20 years	5	5	4	5	5	5	4	5	4	5	4	4	5
Kore - 6	Koore	Kelle Town	Kelle Secondary	MA	Male	16 - 20 years	5	5	5	5	5	5	5	5	5	4	5	5	5
Kore - 7	Koore	Gorka	Jojola M/S/S	Degree	Male	over 20 years	4	4	4	3	4	5	3	4	3	4	4	4	3
Kore - 8	Koore	Kelle Town	Kelle Secondary	Degree	Male	over 20 years	4	4	4	4	4	4	4	3	4	4	4	4	4
Kore - 9	Koore		Dhanso	MA	Male	11 - 15 years	2	2	2	4	2	4	4	4	2	3	2	3	2
Kore - 10	Koore	Amaro	Dhonse	MA	Male	over 20 years	2	2	2	2	2	3	2	3	3	3	2	2	2
Kore - 11	Koore	Kelle Town	Dhonso	Degree	Male	over 20 years	4	5	3	4	4	4	4	4	4	4	4	5	4
Kore - 12	Koore	Kelle Town	Kelle Secondary	MA	Male	16 -20 years	4	4	4	4	4	4	5	4	5	4	4	4	4
Kore - 13	Koore	Gorka	Etate	Degree	Male	over 20 years	5	5	5	5	4	5	4	4	4	5	4	5	5
Kore - 14	Koore	Kelle Town	Dhonso	MA	Male	16 - 20 years	3	4	3	3	3	4	4	4	4	4	4	3	4
Kore - 15	Koore	Gorka	Jijola	Degree	Male	over 20 years	5	5	4	5	5	5	5	5	5	5	5	4	4
Kore - 16	Koore	Gorka	Dano	Degree	Male	11 - 15 years	4	4	3	4	3	3	3	4	4	4	4	4	4
Kore - 17	Koore	Gorka	Jijola	Degree	Female	6 - 10 years	5	4	4	3	2	5	4	4	3	3	4	5	4
Kore - 18	Koore	Kelle Town	Kelle Secondary	Degree	Male	6 - 10 years	5	4	5	5	5	4	4	5	4	4	4	5	5
Kore - 19	Koore	Gorka	Jijola	Degree	Male	6 - 10 years	4	5	5	5	5	5	3	3	3	5	5	5	1
Kore - 20	Koore	Kelle	Dhonso	MA	Male	6 - 10 years	5	5	5	5	5	5	4	4	4	5	4	5	5
Kore - 21	Koore	Gorka	Mesay Kasa Dano S/S	Degree	Male	6 - 12 years	4	4	5	4	4	4	4	4	4	4	4	4	4
Aari - 1	Aari	South Aari	Berka	Degree	Male	1 - 5 years	4	5	4	5	4	5	4	5	4	5	4	5	4
Aari - 2	Aari			Degree	Male	over 20 years	1	1	4	2	1	1	4	3	4	4	4	1	4
Aari - 3	Aari	Jinka	Meles Zenawi Memorial S/S	MA	Male	16 - 20 years	5	5	5	5	5	5	5	5	5	5	5	5	5
Aari - 4	Aari	Jinka Town Administration	Jinka Secondary School	Degree	Female	16 - 20 years	5	4	4	4	5	5	5	5	5	5	5	5	5
Aari - 6	Aari	Jinka Town Administration	Meles Zenawi Memorial S/S	MA	Male	over 20 years	5	5	4	5	5	5	5	5	4	5	5	5	4
Aari - 7	Aari	Semen Aari	Melorasha Secondary	Degree	Male	11 - 15 years	5	5	5	5	5	5	5	4	4	5	4	5	5
Aari - 8	Aari	Semen Aari	Gelila	Degree	Male	6 - 10 years	4	5	5	5	5	5	5	4	4	4	4	3	3
Aari - 9	Aari	Semen Aari	Gelila	MA	Male	6 - 10 years	5	5	5	5	5	5	5	5	5	5	5	5	5
Aari - 10	Aari	Jinka	Jinka High School	MA	Female	over 20 years	4	5	4	5	5	5	5	5	5	5	5	5	5
Aari - 11	Aari	Jinka	Meles Zenawi Memorial S/S	MA	Male	over 20 years	4	5	4	5	4	5	5	5	5	5	5	5	5
Aari - 12	Aari	South Aari	Goh	Degree	Male	16 - 20 years	4	4	4	4	4	4	4	4	4	4	4	4	4
Aari - 13	Aari	Jinka	Jinka M/S/S	MA	Male	11 - 15 years	5	5	5	5	5	5	5	5	5	5	5	5	4
Aari - 14	Aari	Jinka	Jinka	Degree	Male	over 20 years	3	3	3	3	3	3	3	3	5	3	3	3	4
Aari - 16	Aari	South Aari	Gorker	MA	Male	over 20 years	4	4	5	5	5	5	4	5	5	5	4	5	5
Aari - 17	Aari	Jinka		Degree	Male	11 - 15 years	4	4	4	3	4	5	4	4	4	4	4	4	4
Aari - 18	Aari	South Aari	Gorker	Degree	Female	11 - 15 years	5	5	5	5	5	5	5	5	5	5	5	5	5
Aari - 19	Aari	Jinka	Jinka M/S/S	Degree	Female	11 - 15 years	5	5	4	5	5	5	5	5	5	5	5	5	5
Aari - 20	Aari	Jinka	Jinka Secondary School	Degree	Male	over 20 years	4	4	4	5	5	5	5	5	5	5	4	4	5
Aari - 21	Aari	Jinka	Jinka Secondary School	Degree	Male	over 20 years	4	4	4	4	4	4	4	4	4	4	4	3	4
Aari - 22	Aari	South Aari	Goh	Degree	Male	2024-11-15	3	3	3	3	3	3	3	3	3	3	3	3	3
Aari - 24	Aari	Jinka	Jinka High School	Degree	Female	over 20 years	5	5	4	5	5	5	4	5	5	5	5	5	4
Aari -26	Aari	Baka-Dawla	Yetnebersh	Degree	Male	16 - 20 years	2	3	4	3	3	3	3	4	4	3	3	3	3
Aari - 27	Aari	Jinka	Jinka M/S/S	MA	Female	over 20 years	4	4	3	4	4	4	4	4	4	4	4	4	4
Gard - 1	Gardula	Derashe	Bussa Killa Secondary School	Degree	Female	1 - 5 years	4	4	4	4	4	3	4	4	4	4	4	4	4
Gard - 2	Gardula	Derashe	Gidole Secondary	MA	Male	16 - 20 Years	5	5	4	5	4	5	4	5	4	5	4	4	4
Gard - 3	Gardula	Derashe	Holte	Degree	Male	16 - 20 years	5	5	5	5	5	5	5	5	4	5	4	5	5
Gard - 4	Gardula	Derashe	Arguba	Degree	Male	1 - 5 years	3	5	4	5	5	5	4	4	4	5	5	5	4
Gard - 5	Gardula	Derashe	G/S/S/S	Degree	Female	over 20 years	5	5	4	5	5	5	4	5	5	5	5	5	5
Gard - 6	Gardula	Derashe	G/S/S/S	Degree	Female	over 20 years	5	5	4	5	5	5	4	5	5	5	5	5	5
Gard - 7	Gardula	Derashe	Gidole Secondary	MA	Male	over 20 years	5	5	5	5	5	5	5	5	5	5	5	5	5
Gard - 8	Gardula	Derashe	Gidole Prison Highschool	Degree	Male	over 20 years	4	5	5	5	5	5	5	5	5	5	5	5	5
Gard - 9	Gardula	Derashe	G/S/S/S	Degree	Male	over 20 years	5	5	4	4	4	4	4	5	5	5	4	4	4
Gard - 10	Gardula	Derashe	Gidole Prison Highschool	Degree	Male	1 - 5 years	4	4	3	5	5	5	4	3	2	2	1	1	1
Gard - 11	Gardula	Derashe	Gato	Degree	Male	1 - 5 years	4	5	5	5	5	5	5	5	5	5	5	5	5
Gard - 12	Gardula	Derashe	Shilale	Degree	Male	1 - 5 years	4	4	4	4	4	4	4	4	4	4	4	4	4
Gard - 13	Gardula	Derashe	Holte	Degree	Male	16 - 20 years	4	4	4	4	4	4	4	4	4	4	4	4	4
Gard - 14	Gardula	Derashe	Haybena	Degree	Male	over 20 years	5	5	5	5	5	5	5	4	5	5	4	5	4

## Sheet: EdTech
Code	Zone	Woreda	School Name	Educational Level	Sex	Teaching Experience	The Special Capacity Building Training Program helped me to identify different parts of computers and their functions	The Special Capacity Building Training Program helped me to create my personal email account and start using it to improve my teaching and learning practices	The Special Capacity Building Training Program helped me to exercise using Google Educational Apps for classroom instruction	The Special Capacity Building Training Program helped me to explore the use of social media for educational purposes	The Special Capacity Building Training Program helped me to utilize social media platforms such as Telegram and Facebook to improve my teaching and learning practices	The Special Capacity Building Training Program helped me to identify different types of online educational technology tools that can be used for teaching and learning	The Special Capacity Building Training Program helped me to select appropriate online tools and platforms for different purposes and audiences	The Special Capacity Building Training Program helped me to utilize communication, assessment, and creative tools in my teaching and learning	The Special Capacity Building Training Program helped me to participate in online learning communities that foster digital skills among teachers and other stakeholders	The Special Capacity Building Training Program helped me to utilize artificial intelligence tools during the preparation of lesson plans, assessments, and instructional materials
BU-1	Burji	Soyama	S/S/S/S	Degree	Male	11-15 years	3	4	4	4	4	1	1	4	3	2
BU-2	Burji	Soyama	Shule	Degree	Male	6 -10 years	5	5	4	4	4	4	4	4	5	4
BU -3	Burji			MA	Male	16 -20 years	5	5	5	4	4	1	1	5	4	5
BU -4	Burji			Degree	Male	16-20 years
BU -5	Burji	Soyama	Akeye	Degree	Male	over 20 years	4	2	2	1	3	3	2	5	2	2
BU-6	Burji	Soyama	Soyama	Degree	Male	11 -15 years	3	4	4	4	4	3	3	4	4	3
BU -7	Burji	Soyama Town Administration	Soyama Secondary School	Degree	Male	over 20 years	3	3	3	3	3	3	3	3	3	3
BU -8	Burji	S/Zuria	Chuluse	Degree	Male	11 -15 years	3	4	3	3	4	3	2	2	2	3
BU -9	Burji	S/Zuria	Shule	Degree	Male	6 -10 years	4	5	5	1	5	1	1	5	5	5
BU -10	Burji	Soyama	Akia Secondary	Degree	Male	over 20 years	3	4	4	4	4	4	4	4	3	2
SO -1	South Omo	Hamer	D/M/S/S	Degree	Male	16 -20 years
SO -2	South Omo	Maale	Chaliti Secondary	Degree	Male	6 - 10 years	4	4	5	5	5	5	4	4	5	3
SO -3	South Omo	Aari	Jinka High School	Degree	Male	over 20 years	4	4	4	3	3	3	3	4	3	4
SO -4	South Omo	Maale	Koibe	Degree	Male	11 -15 years	2	1	2	1	4	1	1	1	1	1
SO -5	South Omo	Dassanech	Omo Tefasess	Degree	Female	6 - 10 years	4	4	4	5	4	4	4	4	4	4
SO -6	South Omo	Benna Tsemay	Kaho	Degree	Male	over 20 years	3	3	3	3	4	4	4	3	3	3
SO -7	South Omo	Benna Tsemay	Kako	Degree	Male	11 -15 years	3	3	3	3	4	4	4	3	3	3
SO -8	South Omo	Salamago	Gero	Degree	Male	1 - 5 years	3	4	3	5	5	4	1	4	4	4
SO - 9	South Omo	Hamer	Dimeka	Degree	Female	1 - 5 years	4	4	4	3	4	5	5	4	4	3
Gazo -1	Gamo	Birbir Town	M/A/S/S	MA	Male	over 20 years	4	4	4	4	4	4	5	4	4	4
Gazo -2	Gamo	Boreda	Chilashe	Degree	Male	11 - 15 years	4	5	4	5	5	5	5	4	4	4
Gazo -3	Gamo	Boreda	Boreda Seconday	MA	Male	11 -15 years	4	4	5	5	4	4	5	5	4	4
Gazo -4	Gamo	Boreda	Boreda Seconday	Degree	Male	16 -20 years	2	4	2	2	2	2	3	2	2	2
Gazo -5	Gamo	Birbir Town	M/A/S/S	Degree	Male	over 20 years	4	3	2	2	2	3	3	3	2	2
Gazo -5	Gamo	Birbir Town	M/A/S/S	Degree	Male	over 20 years	3	4	4	4	4	4	4	4	4	4
Gazo -7	Gamo	Boreda	Boreda Seconday	MA	Male	16 -20 years	3	3	4	4	4	4	3	3	3	3
Gazo -8	Gamo	Boreda	Gaga Gocho	Degree	Male	16 -20 years	3	4	4	4	4	3	2	4	3	2
Gazo -9	Gamo	Boreda	Boreda Seconday	MA	Female	6 -10 years
Gazo -10	Gamo	Mirab Abaya	M/A/S/S	Degree	Female	over 20 years	4	4	3	4	3	3	3	4	3	4
Gazo -11	Gamo	Birbir Town	M/A/S/S	Degree	Male	16 -20 years
Gazo -12	Gamo	Boreda	Gaga Gocho	Degree	Male	11 -15 years	5	5	5	5	5	4	4	4	4	3
Gazo - 13	Gamo	Boreda	Boreda Seconday	Degree	Male	16 -20 years	1	1	1	1	1	1	1	1	1	1
Gazo - 14	Gamo	Boreda	Boreda Seconday	Degree	Male	over 20 years	2	2	2	2	2	3	3	2	2	1
Gazo - 15	Gamo	Boreda	Chilashe Secondary School	Degree	Male	6 - 10 years
Gazo - 16	Gamo	Geressie	Bola Zame	Degree	Female	1 -5 years	1	2	1	1	1	1	1	5	1	1
Gazo - 17	Gamo	Mirab Abaya	Ankober	MA	Male	16 -20 years	4	5	4	4	5	5	5	4	5	4
Gazo - 18	Gamo	Geressie	Durbe	Degree	Male	6 - 10 years	5	5	5	5	5	5	5	5	5	5
Gazo - 19	Gamo	Geressie Zuria	Danbile Otora Secondary	Degree	Male	11 - 15 years	4	4	4	4	4	4	4	4	4	3
Gazo - 20	Gamo	Mirab Abaya	Umo Lante	Degree	Male	6 - 10 years	3	3	4	4	4	2	2	4	4	4
Gazo - 21	Gamo	Boreda	Menkura	Degree	Male	16 - 20 years	4	2	2	2	2	2	2	2	2	2
Gazo - 22	Gamo	Boreda	Zefine Hidasse S.S.	Degree	Male	1 - 5 years	5	5	5	5	5	5	5	5	5	5
Gazo - 23	Gamo	Gressie Zuria	Danbile Otora Secondary	Degree	Male	6 - 10 years	4	4	4	4	4	5	4	4	4	Agree
Gazo - 24	Gamo	Geressie Zuria	Garbansa Ayche Secondary School	Degree	Male	11 -15 years	1	1	1	1	1	1	1	1	1	1
Gazo - 25	Gamo	Gressie	G/Ayche	Degree	Male	6 - 10 years	3	4	4	4	4	4	3	4	4	3
Gazo - 26	Gamo	Geressie	Bola Zame	Degree	Male	over 20 years	4	4	4	4	4	4	4	4	4	4
Gazo - 28	Gamo	Arba Minch	Arba Minch S/S	MA	Male	over 20 years	2	3	3	3	3	4	2	3	3	1
Gazo - 29	Gamo	Arba Minch	Arba Minch Limat S/S		Female	11 -15 years	3	4	4	4	4	4	4	4	4	4
Gazo - 30	Gamo	Daramallo	Wacha Secondary	Degree	Male	over 20 years	2	4	4	4	4	5	5	4	4	3
Gazo - 31	Gamo	Arba Minch	Arba Minch Prison	Degree	Female	16 - 20 years	4	2	2	2	2	2	4	2	2	2
Gazo - 32	Gamo	Gacho Baba	Zigiti Merche	Degree	Male	11 - 15 years	5	3	3	4	4	4	4	4	4	3
Gazo - 33	Gamo	Arba Minch		Degree	Female	16 - 20 years	4	3	4	4	4	4	4	4	3	4
Gazo - 34	Gamo	Arba Minch		MA	Female	1 - 5 years	5	5	5	5	5	5	5	5	5	5
Gazo - 35	Gamo	Mirab Abaya	Mirab	Degree	Male	over 20 years	3	3	3	3	3	3	3	3	3	3
Gazo -36	Gamo	Gacho Baba	Gatse	Degree	Female	1 - 5 years	4	4	4	5	4	4	2	3	3	3
Gazo - 37	Gamo	Geressie	Geressie High School	Degree	Male	11 - 15 years	3	3	3	2	2	2	2	1	1	1
Gazo - 38	Gamo	Gacho Baba	Z/Bakole	Degree	Male	16 - 20 years	2	2	2	3	3	3	3	3	3	3
Gazo - 39	Gamo	Mirab Abaya	Wajifo	Degree	Male	1 - 5 years	1	1	1	1	1	4	2	2	2	1
Gazo - 40	Gamo	Geressie	Medium School	Degree	Male	11 - 15 years	3	2	5	4	4	5	4	4	4	4
Gazo - 41	Gamo	Arba Minch Zuria	Sile Sira Primary	Degree	Female	16 - 20 years	2	2	2	4	2	4	2	2	2	4
Gazo - 42	Gamo	Gacho Baba	Zigiti Bakole	MA	Male	16 - 20 years	4	4	4	5	5	5	5	5	4	5
Gazo - 43	Gamo	Geressie	Geressie S.S.	Degree	Female	16 - 20 years	5	3	3	3	2	2	2	2	2	2
Gazo - 44	Gamo	Kamba	Kamba	Degree	Male	16 - 20 years	3	4	3	3	3	3	4	4	3	4
Gazo - 46	Gamo	Arba Minch Zuria	Kola Shele	Degree	Male	11 - 15 years	4	3	3	4	3	4	2	2	4	2
Gazo - 47	Gamo	Arba Minch Zuria	Lante Primary	Degree	Female	6 - 10 years	3	4	4	4	4	4	3	3	3	3
Gazo - 48	Gamo	Mirab Abaya	Umo Lante	Degree	Female	6 - 10 years	2	2	2	2	4	2	2	2	2	2
Gazo - 49	Gamo	Boreda	Chillashe Allo	Degree	Female	11 - 15 years	4	5	4	4	2	2	2	4	3	3
Gazo - 50	Gamo	Mirab Abaya	Mirab Abaya	Degree	Male	11 - 15 years	2	3	3	3	2	2	3	3	3	3
Gazo - 51	Gamo	Dita	Zada	Degree	Female	16 - 20 years	4	3	3	3	3	3	3	3	3	3
Gazo - 52	Gamo	Kamba	Kamba Secondary	Degree	Male	over 20 years	1	3	3	1	1	1	1	1	1	1
Gazo - 53	Gamo	Chencha	Chencha S/S	MA	Male	16 - 20 years	4	4	3	4	4	4	2	4	4	4
Gazo - 54	Gamo	Gressie	Geressie High School	Degree	Male	16 - 20 years	4	4	4	2	2	2	2	2	3	3
Gazo - 55	Gamo	Chencha	Chencha S/S	Degree	Male	1 - 5 years	3	3	3	3	2	2	3	3	3	3
Gazo - 56	Gamo	Gacho Baba	Wusamo	Degree	Male	1 - 5 years	5	5	4	4	4	4	4	4	4	4
Gazo - 57	Gamo	Kamba	Kamba Secondary	Degree	Female	16 - 20 years	5	5	4	4	4	4	4	4	4	4
Gazo - 58	Gamo	Kamba	Kamba Secondary	MA	Male	16 - 20 years	1	1	1	1	1	1	1	1	1	1
Gazo - 59	Gamo	Kamba	Kamba Secondary	Degree	Male	16 - 20 years	2	2	2	2	2	2	2	2	1	1
Gazo - 60	Gamo	Kamba	Kamba Secondary	Degree	Male	6 - 10 years	2	2	2	2	2	4	2	2	2	2
Gazo - 61	Gamo	Dita	Zada Secondary	Degree	Female	6 - 10 years	5	5	5	5	5	5	5	5	5	4
Gazo - 62	Gamo	Dita	Zada Secondary	Degree	Male	6 - 10 years	1	1	1	4	4	4	4	5	5	5
Gazo - 63	Gamo	Arba Minch Zuria	Zeyse Elgo Secondary	Degree	Male	over 20 years	5	5	5	5	5	4	4	5	5	4
Gazo - 64	Gamo	Arba Minch Zuria	Kola Shele	Degree	Male	16 - 20 years	4	4	5	4	3	4	4	4	5	3
Gazo - 65	Gamo	Arba Minch Zuria	Lante	MA	Male	over 20 years	5	4	4	4	5	4	5	5	4	4
Gazo - 66	Gamo	Arba Minch Zuria	Shelle Mella Secondary	Degree	Male	over 20 years	5	4	5	5	5	5	5	5	5	5
Gazo - 67	Gamo	Arba Minch Zuria	Kama Zeyse	Degree	Male	over 20 years	4	4	4	4	4	4	4	4	4	3
Gazo - 68	Gamo	Dita	Zada Secondary	Degree	Male	16 - 20 years	5	5	5	5	5	5	5	5	4	5
Gazo - 69	Gamo	Arba Minch Zuria	Chamo	Degree	Male	16 - 20 years	4	4	4	4	4	4	4	4	4	4
Gazo - 70	Gamo	Dita	Zada	Degree	Female	6 - 10 years	4	4	4	4	4	4	4	4	4	4
Gazo - 71	Gamo	Dita	Zada Secondary	Degree	Female	16 - 20 years	4	2	2	2	3	3	3	2	2	2
Gazo - 72	Gamo	Dita	Woyza	Degree	Female	6 -10 years	4	3	3	3	3	3	3	4	3	3
Gazo - 73	Gamo	Arba Minch Town	Gamo Bayra	MA	Female	over 20 years	2	2	2	2	2	2	2	2	2	2
Gazo - 74	Gamo	Dita	Zada Secondary	Degree	Male	6 - 10 years	3	4	4	3	4	3	3	3	3	3
Gazo - 75	Gamo	Dita	Dita Suluse	Degree	Male	6 - 10 years	3	4	4	3	5	5	3	4	3	4
Gazo - 77	Gamo	Chencha	Dorze	MA	Male	over 20 years	5	5	4	4	4	4	4	4	4	5
Gazo - 78	Gamo	Arba Minch Town	Arba Minch Comp.	MA	Male	over 20 years	4	4	4	4	2	2	2	2	3	3
Gazo - 79	Gamo	Arba Minch Town	Arba Minch Highschool	MA	Female	over 20 years	4	4	4	4	4	4	4	4	4	4
Gazo - 80	Gamo	Chencha	Dorze	Degree	Male	16 - 20 years	4	4	4	4	4	4	4	4	4	4
Gazo - 81	Gamo	Kamba	Kamba Secondary	Degree	Male	16 - 20 years	4	3	3	3	4	3	3	3	3	3
Gazo - 82	Gamo	Geressie Zuria	Danbile Ossa	Degree	Male	11 - 15 years	3	3	4	3	4	4	4	4	5	5
Gazo - 83	Gamo	Boreda	Gaga Gocho	Degree	Male	16 - 20 years	4	4	4	4	4	4	4	4	4	4
Gazo - 84	Gamo	Mirab Abaya	Mirab Abaya	Degree	Male	16 - 20 years	3	3	3	4	5	5	4	5	5	5
Gazo - 85	Gamo	Boreda	Kite	Degree	Male	11 - 15 years	5	5	5	5	5	5	5	5	5	5
Gazo - 86	Gamo	Gressie	Bola Zame	Degree	Female	11 -15 years	5	5	5	5	5	5	5	5	5	4
Gazo - 87	Gamo	Boreda	Gaga Gocho	Degree	Female	6 - 10 years	4	5	4	4	4	4	4	4	4	4
Gazo - 88	Gamo	Boreda	Boreda Seconday	Degree	Female	6 - 10 years	4	4	4	4	4	4	4	4	4	4
Gazo - 89	Gamo	Mirab Abaya	Umo Lante	Degree	Male	16 - 20 years	4	4	4	3	4	5	5	4	4	5
Gazo - 90	Gamo	Mirab Abaya	Umo Lante	Degree	Male	11 - 15 years	4	3	4	4	4	4	4	3	4	4
Gazo - 91	Gamo	Boreda	Boreda Seconday	MA	Male	over 20 years	3	2	4	5	5	5	3	4	3	4
Gazo - 92	Gamo	Boreda	Menusha Secondary	MA	Male	6 -10 years	5	5	5	4	4	4	4	5	4	4
Gazo - 93	Gamo	Boreda	Boreda Seconday	Degree	Male	16 - 20 years	5	5	5	5	5	5	5	5	5	5
Gazo - 94	Gamo	Boreda	Boreda Seconday	MA	Male	11 - 15 years	3	2	3	4	4	4	3	4	4	4
Gazo - 95	Gamo	Birbir Town	Mirab Abaya S/S	MA	Male	11 - 15 years	2	3	2	4	4	4	4	3	2	2
Gazo - 96	Gamo	Birbir Town	Mirab Abaya S/S	MA	Male	16 - 20 years	3	3	3	3	3	4	4	3	3	3
Gazo - 97	Gamo	Boreda	Boreda Seconday	Degree	Male	over 20 years	4	4	4	5	5	3	4	4	4	4
Gazo - 98	Gamo	Bonke	Gazeso	Degree	Female	16 - 20 years	4	3	3	4	4	4	4	4	3	3
Gazo - 99	Gamo	Garda Marta	Qogale	Degree	Female	1 - 5 years	4	4	4	4	4	4	4	4	3	3
Gazo - 100	Gamo	Chencha	Shama	Degree	Male	11 - 15 years	5	5	5	5	5	5	4	5	5	4
Gazo - 101	Gamo	Kogota	Ezzo Secondary	Degree	Female	6 - 10 years	3	4	3	4	4	1	3	2	2	4
Gazo - 102	Gamo	Bonke	Kashaso	Degree	Male	11 - 15 years	4	4	4	4	4	4	5	4	4	4
Gazo - 103	Gamo	Bonke	Gazeso	Degree	Male	11 - 15 years	4	4	3	4	3	4	4	4	4	3
Gazo - 104	Gamo	Selamber Town	Selamber	MA	Male	16 - 20 years	2	4	4	4	4	4	4	2	2	2
Gazo - 105	Gamo	Qucha	S/S/School	Degree	Male	16 - 20 years	4	5	4	3	5	4	4	5	5	5
Gazo - 106	Gamo	Selamber Town	S/S/School	Degree	Male	11 - 15 years	3	4	4	3	4	3	4	3	3	3
Gazo - 107	Gamo	Kucha	Dinke Highschool	Degree	Female	11 - 15 years	5	4	5	4	4	4	4	5	4	5
Gazo - 108	Gamo	Arba Minch Town	Arba Minch	MA	Male	11 - 15 years	4	3	4	4	4	4	4	3	3	3
Gazo - 109	Gamo	Boreda	Boreda Seconday	Degree	Male	16 - 20 years	4	4	5	3	4	4	4	3	4	4
Gazo - 110	Gamo	Arba Minch	Arba Minch S/S	Degree	Male	over 20 years	1	3	4	4	5	3	3	4	1	1
Gazo - 111	Gamo	Arba Minch	Arba Minch	Degree	Male	over 20 years	3	3	4	3	4	3	3	4	2	1
Gazo - 114	Gamo	Arba Minch Town	Arba Minch S/S	Degree	Female	16 - 20 years	4	4	4	5	5	5	5	5	5	5
Gazo - 115	Gamo	Arba Minch Town	Chamo Secondary	MA	Female	over 20 years	4	5	5	5	5	5	4	4	5	5
Gazo - 116	Gamo	Bonke	Gazeso Secondary	Degree	Male	6 - 10 years	4	4	4	5	5	4	4	4	4	4
Gazo - 119	Gamo	Arba Minch	Abaya	Degree	Male	over 20 years	5	5	5	5	5	5	5	5	5	5
Gazo - 120	Gamo	Kogota	Ezzo Secondary	MA	Male	over 20 years	5	5	5	5	5	5	4	5	4	3
Gazo - 122	Gamo	Kogota	Ezzo Secondary	Degree	Male	16 - 20 years	4	4	3	4	4	3	3	4	4	2
Gazo - 123	Gamo	Kogota	Kogota	Degree	Male	6 - 10 years	3	4	4	5	4	3	3	3	4	4
Gazo - 124	Gamo	Arba Minch	Abaya	Degree	Female	16 - 20 years	5	5	5	5	5	5	5	5	5	5
Gazo - 125	Gamo	Arba Minch	Abaya Secondary	Degree	Male	over 20 years	2	2	2	2	2	2	2	4	4	2
Gazo - 126	Gamo	Birbir Town	Mirab Abaya S/S	MA	Female	over 20 years	4	4	4	5	5	5	4	3	2	2
Gazo - 127	Gamo	Birbir Town	Birbir S/S	MA	Female	over 20 years	4	3	3	4	4	4	4	4	3	3
Gazo - 128	Gamo	Kogota	Ezzo Secondary	Degree	Male	11 - 15 years	3	4	4	4	4	4	3	4	4	4
Gazo - 129	Gamo	Bonke	Baza	Degree	Male	1 - 5 years	3	2	3	4	3	4	3	2	2	2
Gazo - 130	Gamo	Arba Minch Zuria	Chano Dorga	Degree	Male	16 - 20 years	2	3	3	3	3	3	3	4	4	4
Gazo - 131	Gamo	Arba Minch	Abaya	Degree	Male	over 20 years	5	5	5	5	5	5	5	5	5	5
Gazo - 132	Gamo	Arba Minch Town	Chamo Secondary	MA	Male	over 20 years	4	5	3	3	4	5	5	5	4	3
Gazo - 133	Gamo	Arba Minch Town	Chamo Secondary	Degree	Male	16 -20 years	3	3	3	3	3	3	3	3	3	3
Gazo - 134	Gamo	Arba Minch Town	Arba Minch S/S	Degree	Male	over 20 years	5	5	5	5	5	5	5	5	4	5
Gazo - 135	Gamo	Mirab Abaya	Mirab Abaya S/S	MA	Male	over 20 years	3	3	3	4	4	3	3	3	3	3
Gazo - 136	Gamo	Daramallo	Wacha Secondary	MA	Male	over 20 years	2	4	2	2	4	3	3	4	3	2
KO - 1	Konso	Karat	Karat	Degree	Female	over 20 years	4	4	5	5	4	5	5	5	5	3
KO - 2	Konso	Karat	Konso Highschool	Degree	Female	11 - 15 years	5	5	5	5	5	5	5	5	5	1
KO - 3	Konso	Kena	Fasha Secondary	Degree	Male	11 - 15 years	4	2	3	2	2	2	3	4	2	2
KO - 4	Konso	Kolme	Kolme	Degree	Male	6 - 10 years	4	4	4	4	4	4	4	4	4	4
KO - 5	Konso	Karat Town	Konso Secondary	Degree	Male	11 - 15 years	3	4	4	5	4	5	5	4	2	4
KO -6	Konso	Karat	Konso Secondary	Degree	Male	1 - 5 years	4	4	4	4	4	5	5	4	4	4
KO - 7	Konso	Karat Town	K/S/P/S	MA	Female	11 - 15 years	4	4	5	5	5	5	5	5	4	4
KO - 8	Konso	Kena	Fasha Secondary	Degree	Male	16 - 20 years	2	2	3	2	2	2	2	3	3	2
KO - 9	Konso	Karat Town	Konso Highschool	Degree	Male	over 20 years	3	3	3	3	3	3	4	4	4	4
KO - 10	Konso	Kena	Fasha Highschool	Degree	Male	11 - 15 years	4	3	3	2	3	3	3	3	3	3
KO - 11	Konso	Karat Zuria	Arsayide	Degree	Male	1 - 5 years	5	5	5	5	5	5	5	5	5	5
KO - 12	Konso	Karat Town	K/S/P/S	MA	Male	over 20 years	5	5	4	4	4	5	5	4	4	2
KO -13	Konso	Kena	Doha Secondary	Degree	Male	11 - 15 years	5	4	4	5	5	5	5	4	5	4
KO - 14	Konso	Kena	Doha Secondary	Degree	Male	over 20 years	3	3	3	3	3	3	3	3	3	3
KO - 15	Konso	Kena	Fasha Secondary	Degree	Male	over 20 years	2	1	1	1	1	1	1	1	1	1
KO - 16	Konso	Segen Zuria	Hailato Dokatu	Degree	Male	over 20 years	4	4	4	5	5	4	3	4	4	4
KO - 18	Konso	Kena	Fasha Secondary	Degree	Male	11 - 15 years	4	4	4	4	5	4	5	4	4	4
Kore - 1	Koore		Dohonso	Degree	Female	over 20 years	4	4	4	4	5	4	4	5	4	4
Kore - 2	Koore		Kelle	Degree	Female	11 - 15 years	4	5	5	5	5	5	5	5	5	5
Kore - 3	Koore	Gorka	M/K/Dano	Degree	Male	6 - 10 years	4	4	4	4	4	5	5	5	4	4
Kore - 4	Koore	Kelle Town	Kelle Secondary	Degree	Male	over 20 years	2	2	2	4	3	3	3	3	3	3
Kore - 5	Koore	Gorka	Jojola M/S/S	Degree	Male	over 20 years	3	3	2	3	3	4	3	3	3	4
Kore - 6	Koore	Kelle Town	Kelle Secondary	MA	Male	16 - 20 years	3	4	2	3	3	4	4	4	3	2
Kore - 7	Koore	Gorka	Jojola M/S/S	Degree	Male	over 20 years	3	3	4	4	4	3	4	4	3	4
Kore - 8	Koore	Kelle Town	Kelle Secondary	Degree	Male	over 20 years	4	3	4	4	4	4	4	3	3	4
Kore - 9	Koore		Dhanso	MA	Male	11 - 15 years	4	2	4	4	4	4	4	4	4	4
Kore - 10	Koore	Amaro	Dhonse	MA	Male	over 20 years	4	4	4	4	4	4	4	4	4	4
Kore - 11	Koore	Kelle Town	Dhonso	Degree	Male	over 20 years	4	3	3	4	4	4	4	4	4	4
Kore - 12	Koore	Kelle Town	Kelle Secondary	MA	Male	16 -20 years	5	3	4	4	4	5	5	5	4	4
Kore - 13	Koore	Gorka	Etate	Degree	Male	over 20 years	1	4	4	4	4	4	4	4	1	4
Kore - 14	Koore	Kelle Town	Dhonso	MA	Male	16 - 20 years	4	4	4	4	4	4	4	4	4	4
Kore - 15	Koore	Gorka	Jijola	Degree	Male	over 20 years	3	3	2	4	4	2	4	3	3	3
Kore - 16	Koore	Gorka	Dano	Degree	Male	11 - 15 years	3	3	4	4	3	3	3	3	4	4
Kore - 17	Koore	Gorka	Jijola	Degree	Female	6 - 10 years	1	5	4	4	5	5	4	4	5	4
Kore - 18	Koore	Kelle Town	Kelle Secondary	Degree	Male	6 - 10 years	4	5	5	5	5	5	5	5	5	5
Kore - 19	Koore	Gorka	Jijola	Degree	Male	6 - 10 years	5	5	5	5	5	5	5	5	5	5
Kore - 20	Koore	Kelle	Dhonso	MA	Male	6 - 10 years	5	4	5	4	5	5	5	5	4	4
Kore - 21	Koore	Gorka	Mesay Kasa Dano S/S	Degree	Male	6 - 12 years	4	5	4	4	4	4	4	4	5	3
Aari - 1	Aari	South Aari	Berka	Degree	Male	1 - 5 years	4	5	4	5	4	5	4	4	5	4
Aari - 2	Aari			Degree	Male	over 20 years	4	2	3	2	4	2	3	2	1	1
Aari - 3	Aari	Jinka	Meles Zenawi Memorial S/S	MA	Male	16 - 20 years	2	2	2	3	3	3	3	3	3	3
Aari - 4	Aari	Jinka Town Administration	Jinka Secondary School	Degree	Female	16 - 20 years	3	4	4	4	3	4	4	3	4	2
Aari - 6	Aari	Jinka Town Administration	Meles Zenawi Memorial S/S	MA	Male	over 20 years	3	1	1	3	3	3	1	1	1	3
Aari - 7	Aari	Semen Aari	Melorasha Secondary	Degree	Male	11 - 15 years	4	4	3	2	2	2	2	2	2	1
Aari - 8	Aari	Semen Aari	Gelila	Degree	Male	6 - 10 years	4	4	3	3	4	3	3	3	3	3
Aari - 9	Aari	Semen Aari	Gelila	MA	Male	6 - 10 years	4	5	5	5	5	5	5	5	5	5
Aari - 10	Aari	Jinka	Jinka High School	MA	Female	over 20 years	5	4	4	5	5	5	5	5	5	4
Aari - 11	Aari	Jinka	Meles Zenawi Memorial S/S	MA	Male	over 20 years	3	3	3	3	2	1	1	1	1	2
Aari - 12	Aari	South Aari	Goh	Degree	Male	16 - 20 years	4	4	4	4	5	5	4	4	4	4
Aari - 13	Aari	Jinka	Jinka M/S/S	MA	Male	11 - 15 years	3	3	2	5	5	3	3	3	4	3
Aari - 14	Aari	Jinka	Jinka	Degree	Male	over 20 years	1	1	1	1	1	1	1	1	1	1
Aari - 16	Aari	South Aari	Gorker	MA	Male	over 20 years	5	5	5	5	5	5	4	4	4	3
Aari - 17	Aari	Jinka		Degree	Male	11 - 15 years	2	2	2	2	2	2	2	2	2	2
Aari - 18	Aari	South Aari	Gorker	Degree	Female	11 - 15 years	4	3	3	5	4	4	4	5	5	3
Aari - 19	Aari	Jinka	Jinka M/S/S	Degree	Female	11 - 15 years	4	3	4	5	5	3	3	3	3	3
Aari - 20	Aari	Jinka	Jinka Secondary School	Degree	Male	over 20 years	3	3	3	3	3	3	3	3	3	3
Aari - 21	Aari	Jinka	Jinka Secondary School	Degree	Male	over 20 years	3	1	1	1	1	1	1	1	1	1
Aari - 22	Aari	South Aari	Goh	Degree	Male	2024-11-15	3	3	3	3	3	3	3	3	3	3
Aari - 24	Aari	Jinka	Jinka High School	Degree	Female	over 20 years	4	3	3	4	4	4	3	4	4	3
Aari -26	Aari	Baka-Dawla	Yetnebersh	Degree	Male	16 - 20 years	2	3	2	2	2	2	2	2	3	4
Aari - 27	Aari	Jinka	Jinka M/S/S	MA	Female	over 20 years	3	4	4	3	4	3	3	3	3	3
Gard - 1	Gardula	Derashe	Bussa Killa Secondary School	Degree	Female	1 - 5 years	4	4	4	4	4	4	4	4	4	4
Gard - 2	Gardula	Derashe	Gidole Secondary	MA	Male	16 - 20 Years	4	4	4	4	4	4	4	5	4	4
Gard - 3	Gardula	Derashe	Holte	Degree	Male	16 - 20 years	4	3	3	5	4	3	3	4	3	4
Gard - 4	Gardula	Derashe	Arguba	Degree	Male	1 - 5 years	5	4	4	4	5	5	5	5	5	5
Gard - 5	Gardula	Derashe	G/S/S/S	Degree	Female	over 20 years	5	4	4	5	5	5	4	5	5	5
Gard - 6	Gardula	Derashe	G/S/S/S	Degree	Female	over 20 years	5	4	4	4	5	5	5	4	5	5
Gard - 7	Gardula	Derashe	Gidole Secondary	MA	Male	over 20 years	2	3	3	3	4	2	2	2	1	1
Gard - 8	Gardula	Derashe	Gidole Prison Highschool	Degree	Male	over 20 years	4	3	3	3	3	3	3	3	3	3
Gard - 9	Gardula	Derashe	G/S/S/S	Degree	Male	over 20 years	3	4	3	3	4	4	4	3	3	3
Gard - 10	Gardula	Derashe	Gidole Prison Highschool	Degree	Male	1 - 5 years	2	3	2	3	4	4	2	1	3	2
Gard - 11	Gardula	Derashe	Gato	Degree	Male	1 - 5 years	4	5	5	5	5	5	5	4	5	4
Gard - 12	Gardula	Derashe	Shilale	Degree	Male	1 - 5 years	4	4	4	4	4	4	4	4	4	4
Gard - 13	Gardula	Derashe	Holte	Degree	Male	16 - 20 years	2	2	2	2	2	2	2	2	2	2
Gard - 14	Gardula	Derashe	Haybena	Degree	Male	over 20 years	2	1	3	1	1	1	1	1	1	3

## Sheet: Professional Development
Code	Zone	Woreda	School Name	Educational Level	Sex	Teaching Experience	The Special Capacity Building Training Program helped me to practice different language teaching activities which are designed to improve my teaching experiences	The Special Capacity Building Training Program helped me to build my capacity in my teaching profession	The Special Capacity Building Training Program helped me to update my understanding of specific subject matter content knowledge and pedagogical skills	The Special Capacity Building Training Program helped me to advance my subject-oriented teaching methods and instructional strategies	The Special Capacity Building Training Program empowered me to easily facilitate my teaching profession more effectively	The Special Capacity Building Training Program helped me to improve my confidence and mastery of my subject matter	The Special Capacity Building Training Program helped me to deliver the English lessons of the new curriculum effectively and efficiently	The Special Capacity Building Training Program helped me to prepare English lesson plans based on the newly learned format	The Special Capacity Building Training Program helped me to share my English language teaching experiences	The Special Capacity Building Training Program helped me to comment on the appropriateness of English language teaching practices	The Special Capacity Building Training Program helped me to access relevant educational resources online through cloud technology	The Special Capacity Building Training Program helped me to understand educational technology related concepts, locally available digital resources, and their practical implication at the school level
BU-1	Burji	Soyama	S/S/S/S	Degree	Male	11-15 years	4	4	4	4	4	4	4	4	4	1	1	2
BU-2	Burji	Soyama	Shule	Degree	Male	6 -10 years	5	5	5	4	4	4	4	5	5	5	5	4
BU -3	Burji			MA	Male	16 -20 years	5	4	4	4	4	5	4	5	4	4	4	5
BU -4	Burji			Degree	Male	16-20 years
BU -5	Burji	Soyama	Akeye	Degree	Male	over 20 years	1	2	3	1	2	3	3	2	2	3	1	3
BU-6	Burji	Soyama	Soyama	Degree	Male	11 -15 years	4	4	3	3	3	3	2	3	3	2	3	2
BU -7	Burji	Soyama Town Administration	Soyama Secondary School	Degree	Male	over 20 years	4	4	4	4	3	4	4	4	4	4	3	3
BU -8	Burji	S/Zuria	Chuluse	Degree	Male	11 -15 years	4	4	5	4	5	4	4	5	5	4	4	4
BU -9	Burji	S/Zuria	Shule	Degree	Male	6 -10 years	5	5	5	5	4	5	5	5	5	5	5	5
BU -10	Burji	Soyama	Akia Secondary	Degree	Male	over 20 years	4	3	4	3	4	4	3	4	4	4	3	4
SO -1	South Omo	Hamer	D/M/S/S	Degree	Male	16 -20 years
SO -2	South Omo	Maale	Chaliti Secondary	Degree	Male	6 - 10 years	5	5	4	4	4	5	5	5	4	5	3	5
SO -3	South Omo	Aari	Jinka High School	Degree	Male	over 20 years	4	5	4	4	4	4	4	5	5	4	4	4
SO -4	South Omo	Maale	Koibe	Degree	Male	11 -15 years	4	4	4	2	2	4	4	4	4	4	1	1
SO -5	South Omo	Dassanech	Omo Tefasess	Degree	Female	6 - 10 years	5	4	4	5	5	4	5	5	4	4	4	4
SO -6	South Omo	Benna Tsemay	Kaho	Degree	Male	over 20 years	4	4	4	3	3	3	3	4	4	4	3	3
SO -7	South Omo	Benna Tsemay	Kako	Degree	Male	11 -15 years	4	4	4	3	3	3	3	4	4	4	3	3
SO -8	South Omo	Salamago	Gero	Degree	Male	1 - 5 years	4	5	4	5	5	5	5	4	5	4	4	5
SO - 9	South Omo	Hamer	Dimeka	Degree	Female	1 - 5 years	4	5	4	5	4	4	5	4	5	4	3	3
Gazo -1	Gamo	Birbir Town	M/A/S/S	MA	Male	over 20 years	5	5	5	5	4	5	5	5	5	5	4	4
Gazo -2	Gamo	Boreda	Chilashe	Degree	Male	11 - 15 years	4	4	4	4	4	5	4	4	4	4	4	4
Gazo -3	Gamo	Boreda	Boreda Seconday	MA	Male	11 -15 years	4	4	5	5	4	5	4	5	4	4	5	5
Gazo -4	Gamo	Boreda	Boreda Seconday	Degree	Male	16 -20 years	4	4	4	4	4	5	4	4	5	5	2	3
Gazo -5	Gamo	Birbir Town	M/A/S/S	Degree	Male	over 20 years	4	4	5	4	4	4	4	4	4	4	3	3
Gazo -6	Gamo	Birbir Town	M/A/S/S	Degree	Male	over 20 years	4	4	4	4	4	4	4	4	4	4	4	4
Gazo -7	Gamo	Boreda	Boreda Seconday	MA	Male	16 -20 years	5	5	5	5	5	5	5	5	5	5	4	4
Gazo -8	Gamo	Boreda	Gaga Gocho	Degree	Male	16 -20 years	4	4	4	4	4	4	4	4	4	4	4	5
Gazo -9	Gamo	Boreda	Boreda Seconday	MA	Female	6 -10 years	2	2	2	2	2	2	3	4	4	4	1	1
Gazo -10	Gamo	Mirab Abaya	M/A/S/S	Degree	Female	over 20 years	4	4	4	4	4	4	4	4	4	4	3	3
Gazo -11	Gamo	Birbir Town	M/A/S/S	Degree	Male	16 -20 years	4	4	5	4	5	5	4	4	4	4	4	4
Gazo -12	Gamo	Boreda	Gaga Gocho	Degree	Male	11 -15 years	5	5	5	5	5	5	5	1	4	4	5	5
Gazo - 13	Gamo	Boreda	Boreda Seconday	Degree	Male	16 -20 years	4	4	4	4	4	4	4	4	4	4	1	1
Gazo - 14	Gamo	Boreda	Boreda Seconday	Degree	Male	over 20 years	4	4	3	4	4	3	4	4	4	4	2	4
Gazo - 15	Gamo	Boreda	Chilashe Secondary School	Degree	Male	6 - 10 years	5	5	5	5	5	4	5	4	5	5	4	5
Gazo - 16	Gamo	Geressie	Bola Zame	Degree	Female	1 -5 years	5	5	4	4	5	5	4	4	5	5	1	1
Gazo - 17	Gamo	Mirab Abaya	Ankober	MA	Male	16 -20 years	5	5	5	4	4	4	5	5	5	4	4	4
Gazo - 18	Gamo	Geressie	Durbe	Degree	Male	6 - 10 years	5	5	5	5	4	4	4	5	5	5	4	4
Gazo - 19	Gamo	Geressie Zuria	Danbile Otora Secondary	Degree	Male	11 - 15 years	4	4	4	4	4	4	4	4	4	4	3	4
Gazo - 20	Gamo	Mirab Abaya	Umo Lante	Degree	Male	6 - 10 years	4	4	5	5	4	4	4	5	4	4	2	2
Gazo - 21	Gamo	Boreda	Menkura	Degree	Male	16 - 20 years	4	4	5	5	5	5	5	5	5	4	3	3
Gazo - 22	Gamo	Boreda	Zefine Hidasse S.S.	Degree	Male	1 - 5 years	5	5	5	5	5	5	5	5	5	5	5	5
Gazo - 23	Gamo	Gressie Zuria	Danbile Otora Secondary	Degree	Male	6 - 10 years	4	4	4	5	5	4	4	4	4	4	4	5
Gazo - 24	Gamo	Geressie Zuria	Garbansa Ayche Secondary School	Degree	Male	11 -15 years	4	5	5	5	5	5	5	5	4	5	1	1
Gazo - 25	Gamo	Gressie	G/Ayche	Degree	Male	6 - 10 years	3	4	3	5	4	5	5	5	4	4	3	5
Gazo - 26	Gamo	Geressie	Bola Zame	Degree	Male	over 20 years	4	4	4	4	4	4	4	4	4	4	4	4
Gazo - 28	Gamo	Arba Minch	Arba Minch S/S	MA	Male	over 20 years	3	3	3	3	3	3	3	3	4	3	3	3
Gazo - 29	Gamo	Arba Minch	Arba Minch Limat S/S		Female	11 -15 years	5	5	5	4	4	5	5	5	5	5	4	5
Gazo - 30	Gamo	Daramallo	Wacha Secondary	Degree	Male	over 20 years	5	5	5	5	5	5	5	5	5	5	4	4
Gazo - 31	Gamo	Arba Minch	Arba Minch Prison	Degree	Female	16 - 20 years	5	5	5	5	4	4	5	5	5	4	4	4
Gazo - 32	Gamo	Gacho Baba	Zigiti Merche	Degree	Male	11 - 15 years	5	4	5	5	5	5	5	5	5	5	3	4
Gazo - 33	Gamo	Arba Minch		Degree	Female	16 - 20 years	3	3	3	3	3	3	3	3	3	3	3	3
Gazo - 34	Gamo	Arba Minch		MA	Female	1 - 5 years	5	5	5	5	5	5	5	5	5	5	5	5
Gazo - 35	Gamo	Mirab Abaya	Mirab	Degree	Male	over 20 years	4	1	1	3	4	4	4	3	2	2	2	2
Gazo -36	Gamo	Gacho Baba	Gatse	Degree	Female	1 - 5 years	5	5	5	5	5	5	5	5	5	5	1	1
Gazo - 37	Gamo	Geressie	Geressie High School	Degree	Male	11 - 15 years	4	4	4	4	4	4	4	4	4	3	3	3
Gazo - 38	Gamo	Gacho Baba	Z/Bakole	Degree	Male	16 - 20 years	4	2	4	4	2	4	4	4	4	4	2	2
Gazo - 39	Gamo	Mirab Abaya	Wajifo	Degree	Male	1 - 5 years	1	1	5	3	4	5	4	4	4	4	5	3
Gazo - 40	Gamo	Geressie	Medium School	Degree	Male	11 - 15 years	2	3	4	4	4	4	4	4	4	4	2	2
Gazo - 41	Gamo	Arba Minch Zuria	Sile Sira Primary	Degree	Female	16 - 20 years	4	5	5	5	5	5	5	4	4	5	4	5
Gazo - 42	Gamo	Gacho Baba	Zigiti Bakole	MA	Male	16 - 20 years	5	5	5	5	5	5	5	5	5	5	5	5
Gazo - 43	Gamo	Geressie	Geressie S.S.	Degree	Female	16 - 20 years	4	4	5	5	4	4	4	4	5	4	4	3
Gazo - 44	Gamo	Kamba	Kamba	Degree	Male	16 - 20 years	3	4	4	3	3	4	3	4	4	4	2	3
Gazo - 46	Gamo	Arba Minch Zuria	Kola Shele	Degree	Male	11 - 15 years	3	4	4	3	3	4	3	4	4	4	2	3
Gazo - 47	Gamo	Arba Minch Zuria	Lante Primary	Degree	Female	6 - 10 years	4	4	4	4	4	4	4	4	4	4	3	3
Gazo - 48	Gamo	Mirab Abaya	Umo Lante	Degree	Female	6 - 10 years	4	4	4	2	3	2	2	4	4	4	2	2
Gazo - 49	Gamo	Boreda	Chillashe Allo	Degree	Female	11 - 15 years	4	2	4	5	4	5	4	5	4	5	4	5
Gazo - 50	Gamo	Mirab Abaya	Mirab Abaya	Degree	Male	11 - 15 years	4	4	4	4	4	5	5	5	5	5	5	5
Gazo - 51	Gamo	Dita	Zada	Degree	Female	16 - 20 years	5	5	5	5	5	5	4	4	4	4	3	4
Gazo - 52	Gamo	Kamba	Kamba Secondary	Degree	Male	over 20 years	5	4	4	4	4	4	5	5	5	5	4	4
Gazo - 53	Gamo	Chencha	Chencha S/S	MA	Male	16 - 20 years	5	4	4	4	5	5	4	5	5	5	5	5
Gazo - 54	Gamo	Gressie	Geressie High School	Degree	Male	16 - 20 years	2	3	2	3	1	2	1	1	2	2	3	4
Gazo - 55	Gamo	Chencha	Chencha S/S	Degree	Male	1 - 5 years	2	2	2	4	4	4	3	3	3	4	4	4
Gazo - 56	Gamo	Gacho Baba	Wusamo	Degree	Male	1 - 5 years	5	5	5	5	5	5	5	5	5	5	5	5
Gazo - 57	Gamo	Kamba	Kamba Secondary	Degree	Female	16 - 20 years	4	4	5	5	5	4	5	5	5	5	5	5
Gazo - 58	Gamo	Kamba	Kamba Secondary	MA	Male	16 - 20 years	5	5	5	5	5	5	5	5	5	5	4	4
Gazo - 59	Gamo	Kamba	Kamba Secondary	Degree	Male	16 - 20 years	5	5	5	4	4	4	5	5	5	4	2	2
Gazo - 60	Gamo	Kamba	Kamba Secondary	Degree	Male	6 - 10 years	4	3	3	4	3	3	3	3	3	3	3	2
Gazo - 61	Gamo	Dita	Zada Secondary	Degree	Female	6 - 10 years	5	5	5	4	5	5	5	5	5	5	5	5
Gazo - 62	Gamo	Dita	Zada Secondary	Degree	Male	6 - 10 years	1	3	2	1	1	2	2	1	1	1	3	3
Gazo - 63	Gamo	Arba Minch Zuria	Zeyse Elgo Secondary	Degree	Male	over 20 years	5	5	5	5	5	5	5	5	5	5	5	5
Gazo - 64	Gamo	Arba Minch Zuria	Kola Shele	Degree	Male	16 - 20 years	4	4	5	4	4	4	4	5	4	4	4	4
Gazo - 65	Gamo	Arba Minch Zuria	Lante	MA	Male	over 20 years	5	5	5	5	4	5	5	5	4	5	4	5
Gazo - 66	Gamo	Arba Minch Zuria	Shelle Mella Secondary	Degree	Male	over 20 years	5	5	5	5	5	5	5	5	5	5	5	5
Gazo - 67	Gamo	Arba Minch Zuria	Kama Zeyse	Degree	Male	over 20 years	5	5	5	5	5	5	5	5	5	5	4	5
Gazo - 68	Gamo	Dita	Zada Secondary	Degree	Male	16 - 20 years	5	5	5	5	5	5	5	5	5	5	5	5
Gazo - 69	Gamo	Arba Minch Zuria	Chamo	Degree	Male	16 - 20 years	3	4	4	3	4	4	4	4	4	4	4	4
Gazo - 70	Gamo	Dita	Zada	Degree	Female	6 - 10 years	4	4	5	4	4	4	4	4	4	4	3	4
Gazo - 71	Gamo	Dita	Zada Secondary	Degree	Female	16 - 20 years	5	4	5	4	4	4	4	4	4	4	4	3
Gazo - 72	Gamo	Dita	Woyza	Degree	Female	6 -10 years	4	4	4	4	4	4	4	4	4	4	4	4
Gazo - 73	Gamo	Arba Minch Town	Gamo Bayra	MA	Female	over 20 years	4	4	4	4	3	3	4	4	4	4	3	3
Gazo - 74	Gamo	Dita	Zada Secondary	Degree	Male	6 - 10 years	3	3	3	3	3	3	3	3	3	3	3	3
Gazo - 75	Gamo	Dita	Dita Suluse	Degree	Male	6 - 10 years	5	4	5	5	4	5	5	5	5	3	5	5
Gazo - 77	Gamo	Chencha	Dorze	MA	Male	over 20 years	4	4	4	4	4	4	4	4	4	5	3	3
Gazo - 78	Gamo	Arba Minch Town	Arba Minch Comp.	MA	Male	over 20 years	4	4	4	4	4	4	4	4	4	4	4	4
Gazo - 79	Gamo	Arba Minch Town	Arba Minch Highschool	MA	Female	over 20 years	4	4	4	4	4	4	4	4	4	4	4	4
Gazo - 80	Gamo	Chencha	Dorze	Degree	Male	16 - 20 years	4	4	4	4	4	4	5	5	5	5	4	4
Gazo - 81	Gamo	Kamba	Kamba Secondary	Degree	Male	16 - 20 years	5	3	5	4	4	4	5	5	5	3	3	3
Gazo - 82	Gamo	Geressie Zuria	Danbile Ossa	Degree	Male	11 - 15 years	5	5	5	5	5	5	5	5	5	5	3	3
Gazo - 83	Gamo	Boreda	Gaga Gocho	Degree	Male	16 - 20 years	3	3	4	3	4	4	4	4	5	4	4	4
Gazo - 84	Gamo	Mirab Abaya	Mirab Abaya	Degree	Male	16 - 20 years	5	5	5	5	5	5	5	5	5	5	5	5
Gazo - 85	Gamo	Boreda	Kite	Degree	Male	11 - 15 years	5	5	5	5	5	5	5	5	5	5	5	5
Gazo - 86	Gamo	Gressie	Bola Zame	Degree	Female	11 -15 years	4	5	4	4	4	5	5	4	4	4	4	4
Gazo - 87	Gamo	Boreda	Gaga Gocho	Degree	Female	6 - 10 years	4	4	4	4	4	4	4	4	4	4	4	4
Gazo - 88	Gamo	Boreda	Boreda Seconday	Degree	Female	6 - 10 years	4	4	4	4	4	4	4	4	4	4	4	4
Gazo - 89	Gamo	Mirab Abaya	Umo Lante	Degree	Male	16 - 20 years	5	4	5	5	4	5	4	4	3	4	3	5
Gazo - 90	Gamo	Mirab Abaya	Umo Lante	Degree	Male	11 - 15 years	5	4	4	4	4	4	4	5	5	4	4	4
Gazo - 91	Gamo	Boreda	Boreda Seconday	MA	Male	over 20 years	5	5	5	5	5	5	5	5	5	4	4	5
Gazo - 92	Gamo	Boreda	Menusha Secondary	MA	Male	6 -10 years	5	5	5	5	5	5	4	5	5	5	4	5
Gazo - 93	Gamo	Boreda	Boreda Seconday	Degree	Male	16 - 20 years	4	4	4	4	4	4	4	4	4	4	5	5
Gazo - 94	Gamo	Boreda	Boreda Seconday	MA	Male	11 - 15 years	4	4	4	4	4	4	4	4	4	3	4	4
Gazo - 95	Gamo	Birbir Town	Mirab Abaya S/S	MA	Male	11 - 15 years	4	4	4	4	4	4	4	4	4	4	3	3
Gazo - 96	Gamo	Birbir Town	Mirab Abaya S/S	MA	Male	16 - 20 years	4	4	4	5	4	5	5	5	5	4	4	4
Gazo - 97	Gamo	Boreda	Boreda Seconday	Degree	Male	over 20 years	4	4	5	5	4	4	4	5	4	4	4	4
Gazo - 98	Gamo	Bonke	Gazeso	Degree	Female	16 - 20 years	4	5	4	4	4	4	4	4	4	4	5	4
Gazo - 99	Gamo	Garda Marta	Qogale	Degree	Female	1 - 5 years	5	5	5	5	5	5	5	5	5	5	5	5
Gazo - 100	Gamo	Chencha	Shama	Degree	Male	11 - 15 years	4	5	5	5	4	5	5	5	5	4	4	5
Gazo - 101	Gamo	Kogota	Ezzo Secondary	Degree	Female	6 - 10 years	3	3	4	4	3	4	4	4	4	4	4	4
Gazo - 102	Gamo	Bonke	Kashaso	Degree	Male	11 - 15 years	4	4	4	5	4	4	4	4	4	4	4	4
Gazo - 103	Gamo	Bonke	Gazeso	Degree	Male	11 - 15 years	4	4	4	5	5	5	5	5	5	5	3	4
Gazo - 104	Gamo	Selamber Town	Selamber	MA	Male	16 - 20 years	4	4	5	4	4	5	5	4	5	4	4	4
Gazo - 105	Gamo	Qucha	S/S/School	Degree	Male	16 - 20 years	3	3	3	3	3	3	3	3	3	3	3	3
Gazo - 106	Gamo	Selamber Town	S/S/School	Degree	Male	11 - 15 years	4	4	3	3	4	3	4	3	3	4	3	4
Gazo - 107	Gamo	Kucha	Dinke Highschool	Degree	Female	11 - 15 years	4	5	4	5	4	5	4	5	4	5	4	5
Gazo - 108	Gamo	Arba Minch Town	Arba Minch	MA	Male	11 - 15 years	4	4	4	4	4	4	4	4	4	4	4	4
Gazo - 109	Gamo	Boreda	Boreda Seconday	Degree	Male	16 - 20 years	4	4	4	4	5	4	5	4	5	4	4	4
Gazo - 110	Gamo	Arba Minch	Arba Minch S/S	Degree	Male	over 20 years	5	5	5	4	4	5	5	5	4	4	1	1
Gazo - 111	Gamo	Arba Minch	Arba Minch	Degree	Male	over 20 years	4	4	4	4	4	4	4	5	4	4	2	2
Gazo - 114	Gamo	Arba Minch Town	Arba Minch S/S	Degree	Female	16 - 20 years	5	5	5	5	5	5	5	5	5	5	4	3
Gazo - 115	Gamo	Arba Minch Town	Chamo Secondary	MA	Female	over 20 years	4	5	5	5	5	5	4	5	5	5	5	5
Gazo - 116	Gamo	Bonke	Gazeso Secondary	Degree	Male	6 - 10 years	5	5	5	5	5	5	5	5	5	5	4	4
Gazo - 119	Gamo	Arba Minch	Abaya	Degree	Male	over 20 years	5	5	5	5	5	5	5	4	4	5	5	5
Gazo - 120	Gamo	Kogota	Ezzo Secondary	MA	Male	over 20 years	5	4	4	4	4	5	5	5	5	5	3	3
Gazo - 122	Gamo	Kogota	Ezzo Secondary	Degree	Male	16 - 20 years	3	3	3	3	3	3	3	3	3	3	3	3
Gazo - 123	Gamo	Kogota	Kogota	Degree	Male	6 - 10 years	5	5	5	4	4	4	4	4	5	4	3	4
Gazo - 124	Gamo	Arba Minch	Abaya	Degree	Female	16 - 20 years	5	5	5	5	5	5	5	5	4	5	5	5
Gazo - 125	Gamo	Arba Minch	Abaya Secondary	Degree	Male	over 20 years	4	4	4	4	4	4	4	4	4	4	2	4
Gazo - 126	Gamo	Birbir Town	Mirab Abaya S/S	MA	Female	over 20 years	2	1	1	2	3	3	3	2	2	3	3	2
Gazo - 127	Gamo	Birbir Town	Birbir S/S	MA	Female	over 20 years	4	4	4	4	4	4	3	4	5	5	3	3
Gazo - 128	Gamo	Kogota	Ezzo Secondary	Degree	Male	11 - 15 years	4	4	4	4	4	4	4	4	4	4	4	4
Gazo - 129	Gamo	Bonke	Baza	Degree	Male	1 - 5 years	4	5	5	4	4	5	5	5	5	4	1	2
Gazo - 130	Gamo	Arba Minch Zuria	Chano Dorga	Degree	Male	16 - 20 years	4	4	5	4	4	4	4	5	5	5	4	4
Gazo - 131	Gamo	Arba Minch	Abaya	Degree	Male	over 20 years	5	4	5	4	4	5	4	4	5	5	5	5
Gazo - 132	Gamo	Arba Minch Town	Chamo Secondary	MA	Male	over 20 years	5	5	5	5	5	5	5	4	5	5	2	5
Gazo - 133	Gamo	Arba Minch Town	Chamo Secondary	Degree	Male	16 -20 years	3	3	3	3	3	3	3	3	3	3	3	3
Gazo - 134	Gamo	Arba Minch Town	Arba Minch S/S	Degree	Male	over 20 years	5	5	5	5	5	5	5	5	5	5	5	5
Gazo - 135	Gamo	Mirab Abaya	Mirab Abaya S/S	MA	Male	over 20 years	4	4	4	4	4	4	4	4	4	4	3	5
Gazo - 136	Gamo	Daramallo	Wacha Secondary	MA	Male	over 20 years	5	4	4	4	4	5	4	5	5	5	3	3
KO - 1	Konso	Karat	Karat	Degree	Female	over 20 years	5	5	5	4	5	5	5	5	5	5	4	4
KO - 2	Konso	Karat	Konso Highschool	Degree	Female	11 - 15 years	5	5	5	5	5	5	5	5	5	5	5	5
KO - 3	Konso	Kena	Fasha Secondary	Degree	Male	11 - 15 years	4	4	4	4	4	4	3	4	4	4	2	4
KO - 4	Konso	Kolme	Kolme	Degree	Male	6 - 10 years	4	4	4	4	4	5	5	4	4	4	4	4
KO - 5	Konso	Karat Town	Konso Secondary	Degree	Male	11 - 15 years	3	3	3	3	3	3	3	3	3	3	3	3
KO -6	Konso	Karat	Konso Secondary	Degree	Male	1 - 5 years	5	5	5	5	5	5	4	5	4	4	4	4
KO - 7	Konso	Karat Town	K/S/P/S	MA	Female	11 - 15 years	4	4	5	4	4	5	5	5	5	4	5	5
KO - 8	Konso	Kena	Fasha Secondary	Degree	Male	16 - 20 years	4	4	4	4	4	5	4	4	4	4	4	4
KO - 9	Konso	Karat Town	Konso Highschool	Degree	Male	over 20 years	3	4	3	4	4	4	4	4	4	3	3	4
KO - 10	Konso	Kena	Fasha Highschool	Degree	Male	11 - 15 years	5	5	5	5	5	5	4	4	4	4	5	5
KO - 11	Konso	Karat Zuria	Arsayide	Degree	Male	1 - 5 years	5	5	5	5	5	5	5	5	5	5	5	5
KO - 12	Konso	Karat Town	K/S/P/S	MA	Male	over 20 years	5	5	5	5	5	5	5	5	5	5	5	5
KO -13	Konso	Kena	Doha Secondary	Degree	Male	11 - 15 years	5	5	5	5	5	5	5	5	5	5	5	5
KO - 14	Konso	Kena	Doha Secondary	Degree	Male	over 20 years	3	3	3	3	3	3	3	3	3	3	3	3
KO - 15	Konso	Kena	Fasha Secondary	Degree	Male	over 20 years	3	3	3	3	3	2	3	3	3	3	3	3
KO - 16	Konso	Segen Zuria	Hailato Dokatu	Degree	Male	over 20 years	5	5	4	5	4	5	5	5	5	4	5	5
KO - 18	Konso	Kena	Fasha Secondary	Degree	Male	11 - 15 years	4	4	4	5	4	4	4	5	5	4	5	4
Kore - 1	Koore		Dohonso	Degree	Female	over 20 years	5	5	5	5	4	5	5	5	4	4	4	4
Kore - 2	Koore		Kelle	Degree	Female	11 - 15 years	4	5	5	5	5	4	5	5	5	5	5	5
Kore - 3	Koore	Gorka	M/K/Dano	Degree	Male	6 - 10 years	5	5	5	5	5	4	4	4	4	4	4	4
Kore - 4	Koore	Kelle Town	Kelle Secondary	Degree	Male	over 20 years	2	2	2	2	2	1	3	3	2	3	3	3
Kore - 5	Koore	Gorka	Jojola M/S/S	Degree	Male	over 20 years	4	4	5	4	4	4	4	5	5	4	3	4
Kore - 6	Koore	Kelle Town	Kelle Secondary	MA	Male	16 - 20 years	4	4	4	4	4	5	5	5	5	5	1	5
Kore - 7	Koore	Gorka	Jojola M/S/S	Degree	Male	over 20 years	4	4	4	4	3	4	4	4	4	4	3	3
Kore - 8	Koore	Kelle Town	Kelle Secondary	Degree	Male	over 20 years	4	4	4	4	3	3	4	4	4	5	5	5
Kore - 9	Koore		Dhanso	MA	Male	11 - 15 years	2	2	2	2	2	2	4	4	2	2	4	4
Kore - 10	Koore	Amaro	Dhonse	MA	Male	over 20 years	1	1	1	2	2	1	2	2	2	2	4	4
Kore - 11	Koore	Kelle Town	Dhonso	Degree	Male	over 20 years	4	4	4	4	3	4	3	3	3	4	5	5
Kore - 12	Koore	Kelle Town	Kelle Secondary	MA	Male	16 -20 years	4	3	3	4	4	3	4	4	4	4	5	5
Kore - 13	Koore	Gorka	Etate	Degree	Male	over 20 years	5	5	5	5	5	5	4	5	5	5	4	4
Kore - 14	Koore	Kelle Town	Dhonso	MA	Male	16 - 20 years	4	3	4	3	3	4	4	4	3	4	4	4
Kore - 15	Koore	Gorka	Jijola	Degree	Male	over 20 years	4	4	4	4	4	4	4	5	5	4	4	4
Kore - 16	Koore	Gorka	Dano	Degree	Male	11 - 15 years	5	4	4	4	4	3	4	4	3	3	4	4
Kore - 17	Koore	Gorka	Jijola	Degree	Female	6 - 10 years	4	5	4	5	4	4	5	5	4	3	4	4
Kore - 18	Koore	Kelle Town	Kelle Secondary	Degree	Male	6 - 10 years	5	5	5	5	5	5	5	5	5	5	5	5
Kore - 19	Koore	Gorka	Jijola	Degree	Male	6 - 10 years	5	5	5	5	5	5	5	5	5		4	5
Kore - 20	Koore	Kelle	Dhonso	MA	Male	6 - 10 years	5	5	5	5	5	5	4	5	3	5	4	4
Kore - 21	Koore	Gorka	Mesay Kasa Dano S/S	Degree	Male	6 - 12 years	4	5	4	5	4	4	4	5	5	5	4	4
Aari - 1	Aari	South Aari	Berka	Degree	Male	1 - 5 years	4	5	5	4	5	3	4	4	5	4	5	4
Aari - 2	Aari			Degree	Male	over 20 years	2	3	2	3	2	3	3	3	1	1	1	1
Aari - 3	Aari	Jinka	Meles Zenawi Memorial S/S	MA	Male	16 - 20 years	4	4	4	4	4	4	4	4	4	4	1	2
Aari - 4	Aari	Jinka Town Administration	Jinka Secondary School	Degree	Female	16 - 20 years	3	3	3	3	3	3	3	3	3	3	3	3
Aari - 6	Aari	Jinka Town Administration	Meles Zenawi Memorial S/S	MA	Male	over 20 years	5	5	4	5	5	5	5	5	5	4	1	1
Aari - 7	Aari	Semen Aari	Melorasha Secondary	Degree	Male	11 - 15 years	5	5	5	5	5	5	5	5	5	4	4	2
Aari - 8	Aari	Semen Aari	Gelila	Degree	Male	6 - 10 years	5	5	5	4	3	4	4	4	4	5	3	4
Aari - 9	Aari	Semen Aari	Gelila	MA	Male	6 - 10 years	5	5	5	5	5	5	5	5	5	5	5	5
Aari - 10	Aari	Jinka	Jinka High School	MA	Female	over 20 years	5	5	5	5	5	5	5	5	5	5	5	5
Aari - 11	Aari	Jinka	Meles Zenawi Memorial S/S	MA	Male	over 20 years	5	5	5	5	5	5	5	4	5	4	3	3
Aari - 12	Aari	South Aari	Goh	Degree	Male	16 - 20 years	4	4	4	4	4	5	5	5	5	5	5	5
Aari - 13	Aari	Jinka	Jinka M/S/S	MA	Male	11 - 15 years	5	5	5	5	5	5	4	4	5	4	3	3
Aari - 14	Aari	Jinka	Jinka	Degree	Male	over 20 years	3	2	3	3	3	3	3	3	5	3	1	1
Aari - 16	Aari	South Aari	Gorker	MA	Male	over 20 years	5	5	5	5	5	5	5	4	5	4	4	5
Aari - 17	Aari	Jinka		Degree	Male	11 - 15 years	4	4	4	4	4	4	4	5	5	5	4	4
Aari - 18	Aari	South Aari	Gorker	Degree	Female	11 - 15 years	5	5	5	5	5	5	5	5	5	5	5	5
Aari - 19	Aari	Jinka	Jinka M/S/S	Degree	Female	11 - 15 years	5	5	5	5	4	5	5	5	5	5	2	4
Aari - 20	Aari	Jinka	Jinka Secondary School	Degree	Male	over 20 years	5	5	5	5	4	5	5	5	5	5	1	1
Aari - 21	Aari	Jinka	Jinka Secondary School	Degree	Male	over 20 years	4	4	3	3	3	3	4	4	4	4	3	2
Aari - 22	Aari	South Aari	Goh	Degree	Male	2024-11-15	3	3	3	3	3	3	3	3	3	3	3	3
Aari - 24	Aari	Jinka	Jinka High School	Degree	Female	over 20 years	5	5	5	5	5	5	5	5	5	5	4	5
Aari -26	Aari	Baka-Dawla	Yetnebersh	Degree	Male	16 - 20 years	4	4	3	4	4	3	3	3	4	4	3	3
Aari - 27	Aari	Jinka	Jinka M/S/S	MA	Female	over 20 years	4	4	4	4	3	3	4	4	4	4	3	3
Gard - 1	Gardula	Derashe	Bussa Killa Secondary School	Degree	Female	1 - 5 years	4	4	4	4	4	4	4	4	4	4	4	4
Gard - 2	Gardula	Derashe	Gidole Secondary	MA	Male	16 - 20 Years	4	4	4	5	4	4	4	5	5	5	5	5
Gard - 3	Gardula	Derashe	Holte	Degree	Male	16 - 20 years	5	5	5	5	5	5	5	5	5	5	4	4
Gard - 4	Gardula	Derashe	Arguba	Degree	Male	1 - 5 years	5	5	5	3	4	4	3	5	5	3	5	5
Gard - 5	Gardula	Derashe	G/S/S/S	Degree	Female	over 20 years	5	5	5	5	5	5	5	5	5	5	4	5
Gard - 6	Gardula	Derashe	G/S/S/S	Degree	Female	over 20 years	5	5	5	5	5	5	5	5	5	5	4	5
Gard - 7	Gardula	Derashe	Gidole Secondary	MA	Male	over 20 years	4	5	5	5	4	5	5	5	5	5	4	4
Gard - 8	Gardula	Derashe	Gidole Prison Highschool	Degree	Male	over 20 years	4	4	4	4	4	5	5	5	5	5	3	3
Gard - 9	Gardula	Derashe	G/S/S/S	Degree	Male	over 20 years	4	4	4	4	3	4	4	5	4	4	3	3
Gard - 10	Gardula	Derashe	Gidole Prison Highschool	Degree	Male	1 - 5 years	5	4	4	4	4	4	5	5	4	5	2	4
Gard - 11	Gardula	Derashe	Gato	Degree	Male	1 - 5 years	5	5	5	5	5	5	5	5	5	5	5	5
Gard - 12	Gardula	Derashe	Shilale	Degree	Male	1 - 5 years	4	4	4	4	4	4	4	4	4	4	4	4
Gard - 13	Gardula	Derashe	Holte	Degree	Male	16 - 20 years	2	4	4	4	4	4	4	4	4	4	4	4
Gard - 14	Gardula	Derashe	Haybena	Degree	Male	over 20 years	4	5	4	3	4	4	5	5	4	4	2	2
